# Supplementary material
Source: ML conference proceedings conference paper supplement (https://www.ecva.net/papers/eccv_2020/papers_ECCV/html/123700188_ECCV_2020_paper.php)
Supplement: Supplementary file 1 [file 123700188-supp.zip]

Archive with 2 entries (2 files):
- RealBlur_additional_example.pdf
- RealBlur_supp.pdf
