# Supplementary material
Source: ML conference proceedings conference paper supplement (https://www.ecva.net/papers/eccv_2020/papers_ECCV/html/123700188_ECCV_2020_paper.php)
Supplement: Supplementary file 1 [file 123700188-supp.zip › RealBlur_additional_example.pdf]

# **Real-World Blur Dataset for Learning and Benchmarking Deblurring Algorithms**

## **Supplementary Material II Additional Examples**

Jaesung Rim<sup>1</sup>, Haeyun Lee<sup>1</sup>, Jucheol Won<sup>2</sup>, Sunghyun Cho<sup>2</sup>

<sup>1</sup> DGIST, Daegu, Korea

{jsrim,haeyun}@dgist.ac.kr

<sup>2</sup> POSTECH, Pohang, Korea

{jcwon,s.cho}@postech.ac.kr

# Postprocessing for RealBlur-R (1)

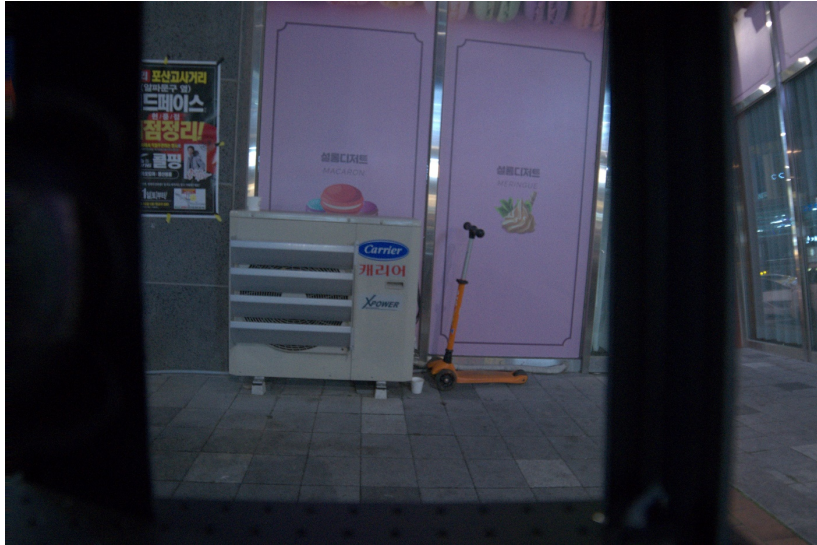

(a) Original sharp image

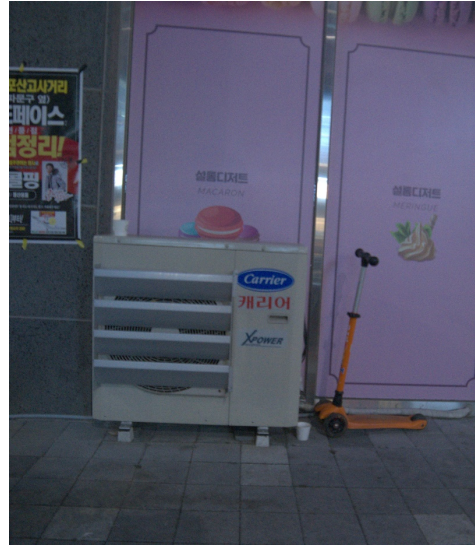

(b) Sharp image after cropping

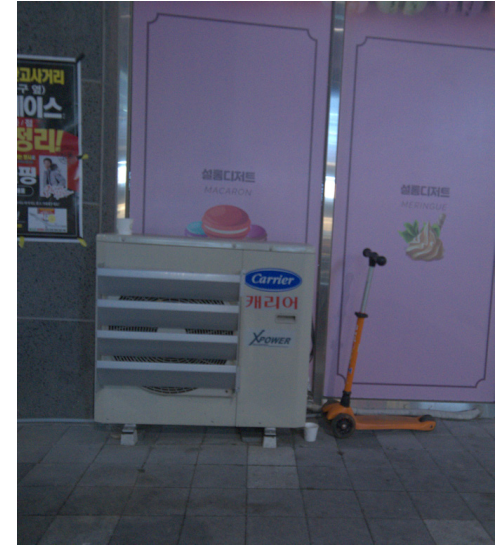

(c) Sharp image after distortion correction and down-sampling

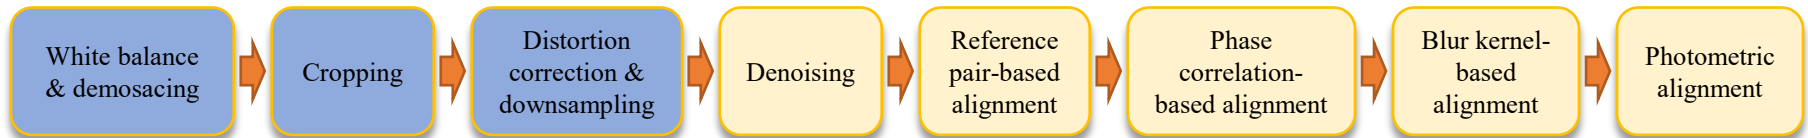

# Postprocessing for RealBlur-R (2)

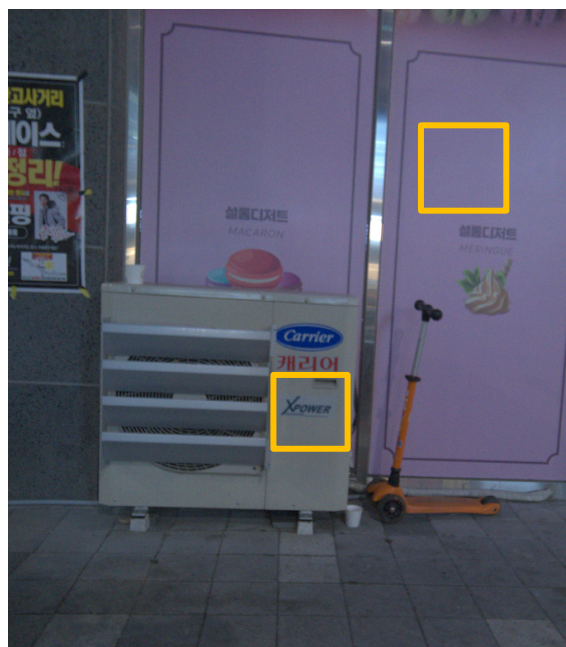

(a) Sharp image before denoising

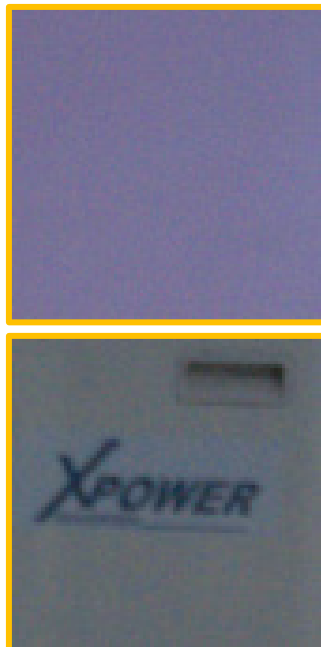

(b) Magnified views of (a)

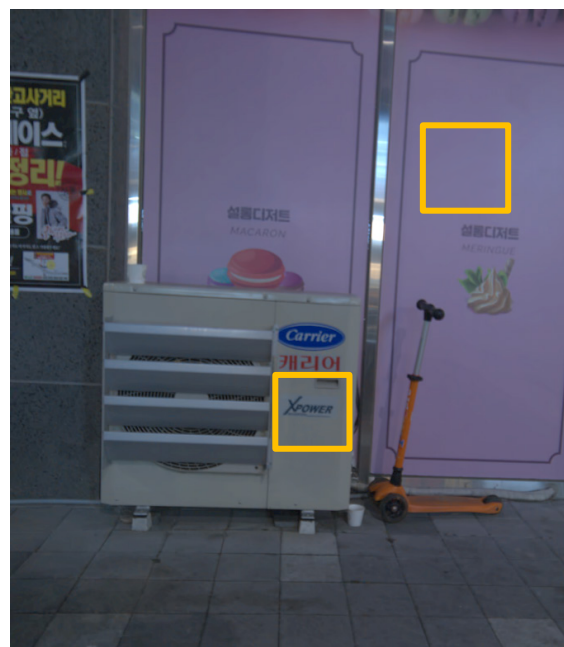

(c) Sharp image after denoising

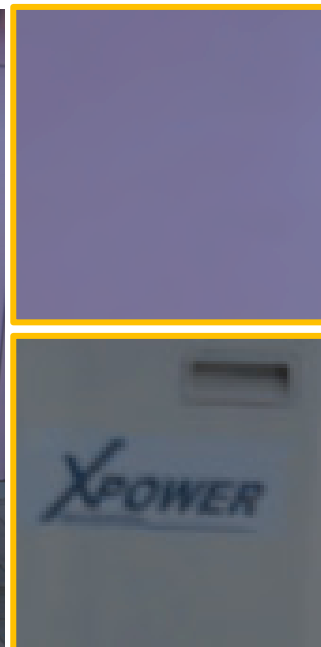

(d) Magnified views of (c)

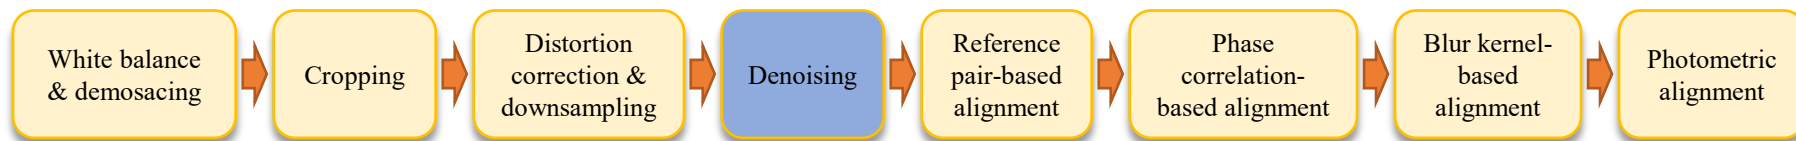

# Postprocessing for RealBlur-R (3)

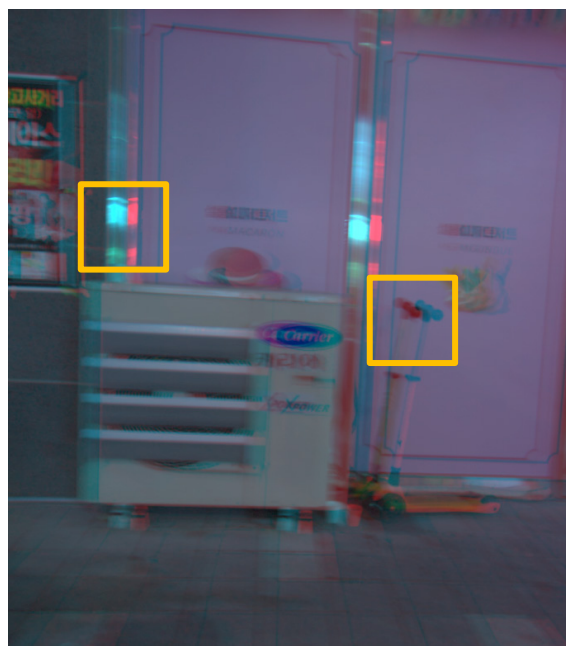

(a) Blurred and sharp image pair before geometric alignment (visualized as a stereo-anaglyph image. Red: sharp image. Cyan: blurred image)

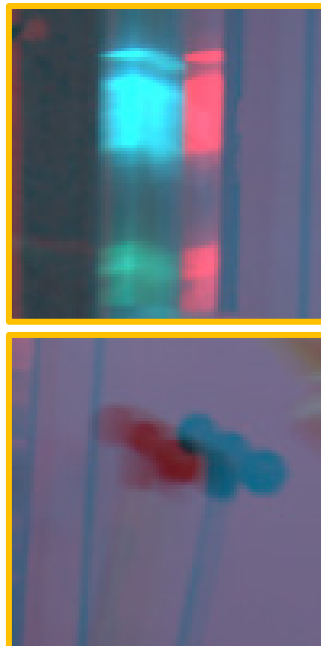

(b) Magnified views of (a)

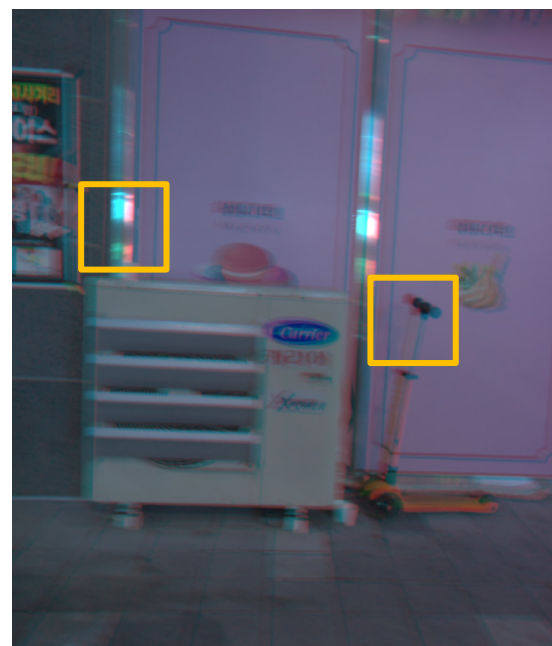

(c) Blurred and sharp image pair after reference pair-based alignment

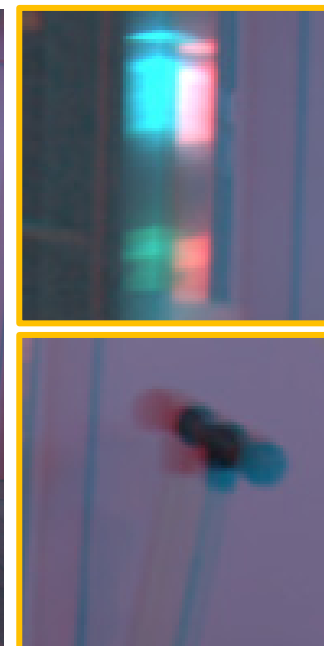

(d) Magnified views of (c)

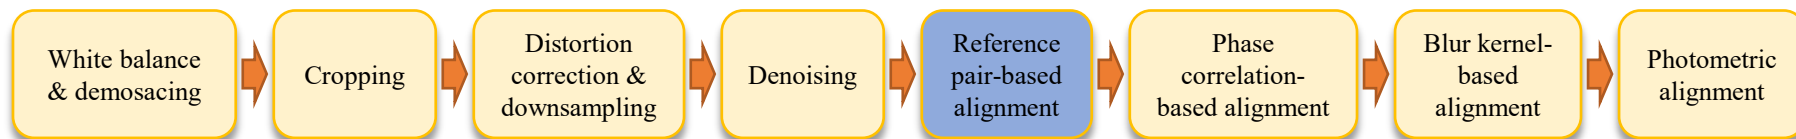

# Postprocessing for RealBlur-R (4)

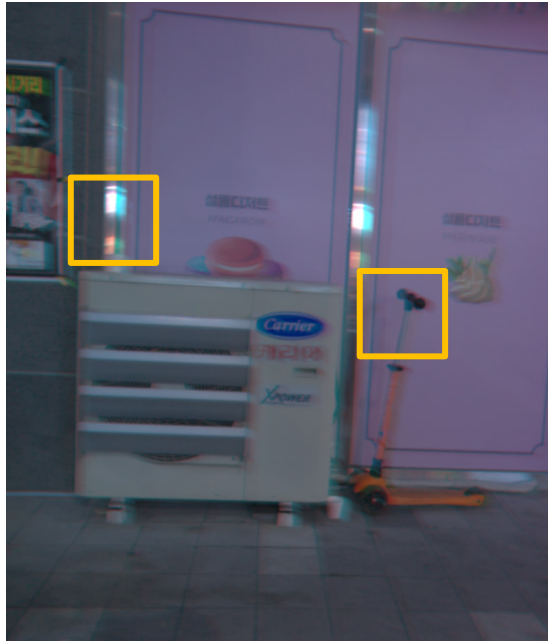

(a) Blurred and sharp image pair after phase correlation-based alignment

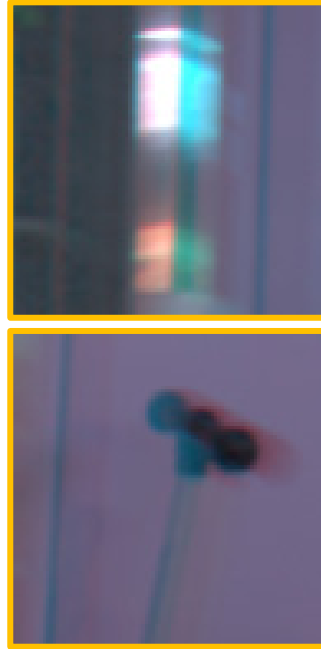

(b) Magnified view of (a)

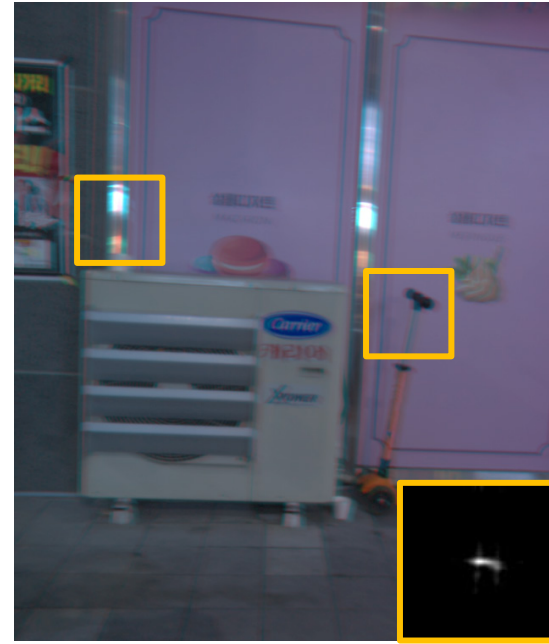

(c) Blurred and sharp image pair after blur kernel based alignment

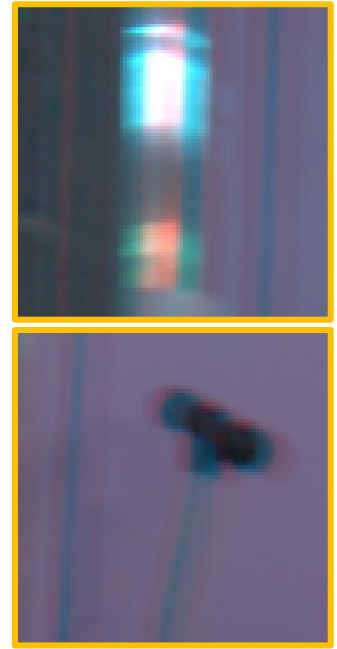

(d) Magnified views of (c)

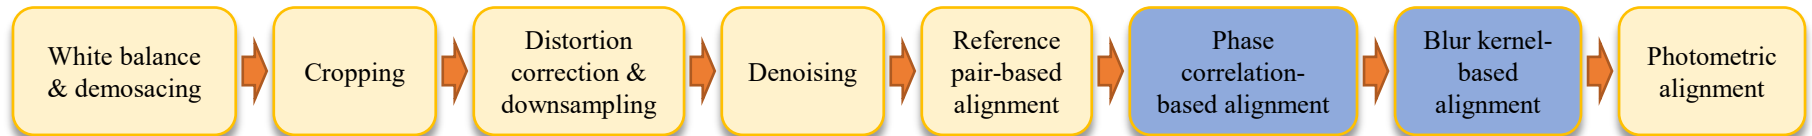

# Postprocessing for RealBlur-R (5)

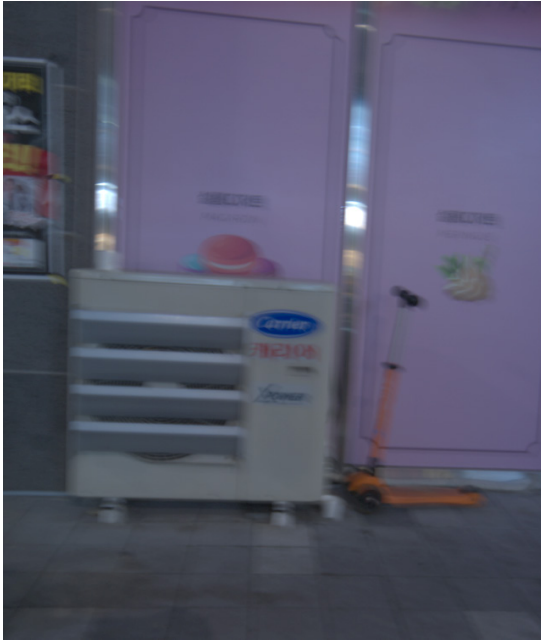

(a) Blurred image

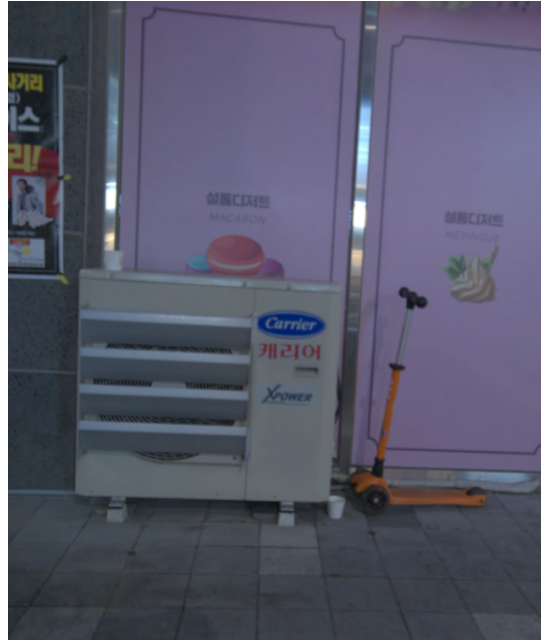

(b) Sharp image

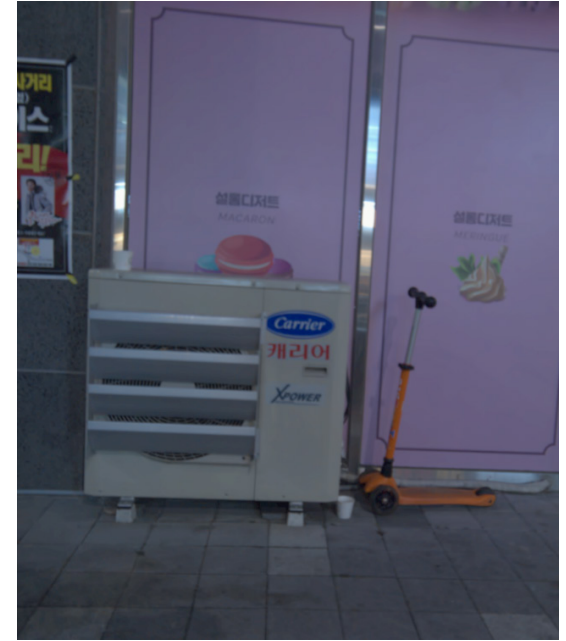

(c) Sharp image after photometric alignment

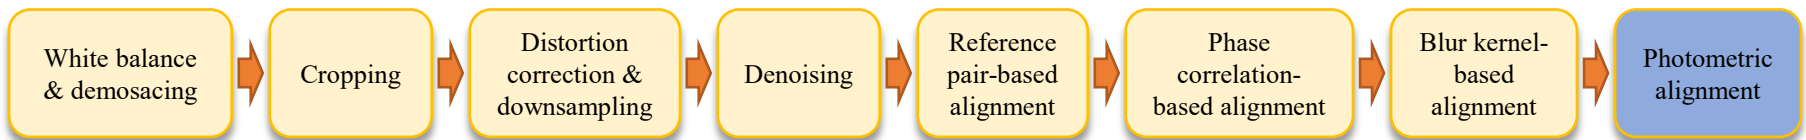

# Additional examples of RealBlur-J (1)

Purple: optimization-based methods. Black: deep learning-based methods. Blue\*: deep learning-based methods trained with our dataset.

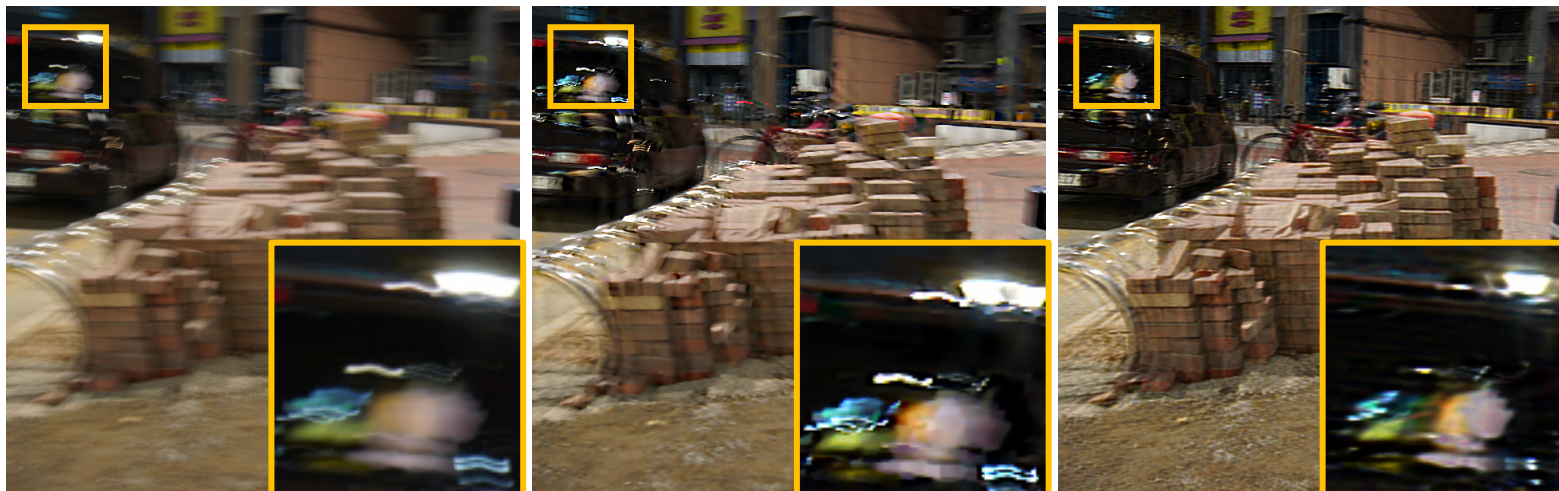

(a) Blurred image  
PSNR/SSIM

(b) Xu et al. [1]  
22.78/0.7102

(c) Pan et al. [2]  
24.56/0.7244

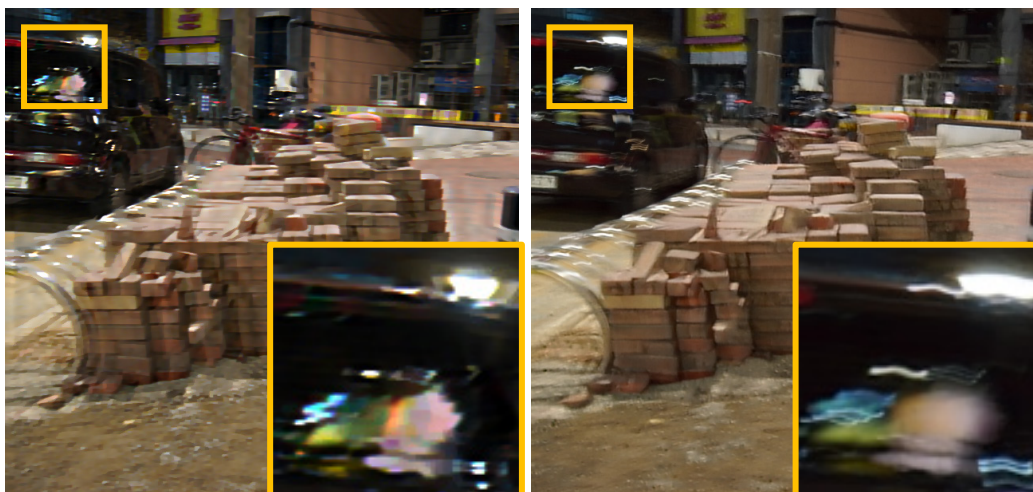

(d) Hu et al. [3]  
25.24/0.7670

(e) Nah et al. [4]  
24.36/0.7258

# Additional examples of RealBlur-J (1)

Purple: optimization-based methods. Black: deep learning-based methods. Blue\*: deep learning-based methods trained with our dataset.

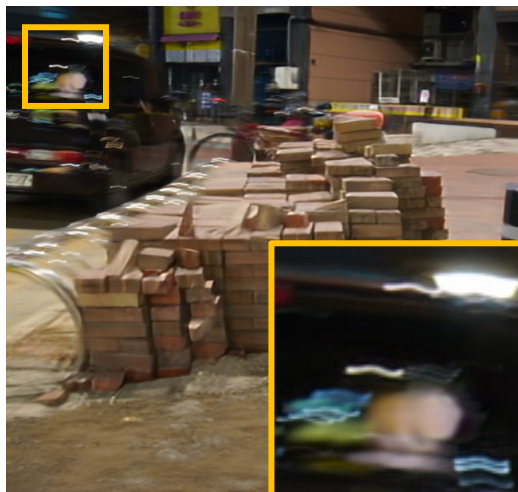

(f) Zhang et al. [5]  
24.62/0.7541

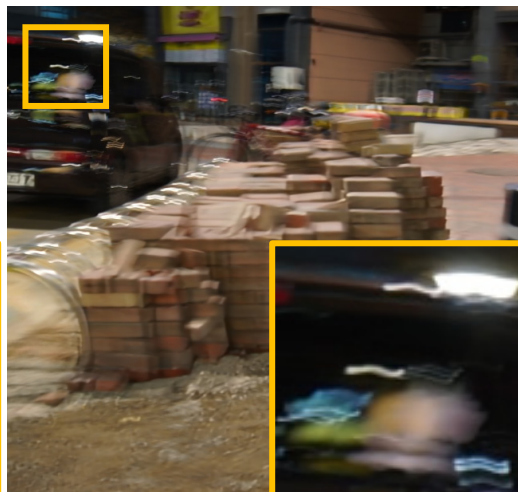

(g) Zhang et al. [6]  
23.49/0.7007

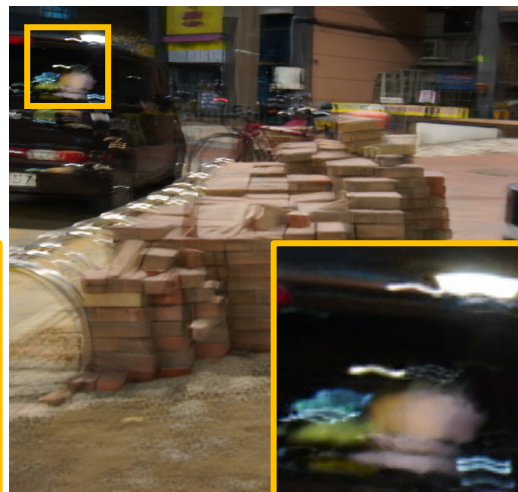

(h) DeblurGAN [7]  
23.61/0.6931

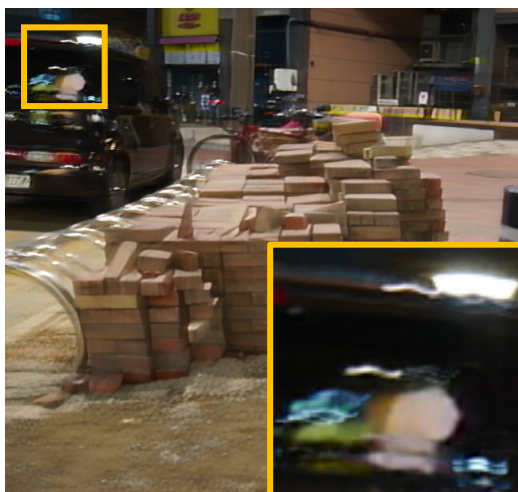

(i) DeblurGAN-v2 [8]  
25.28/0.7721

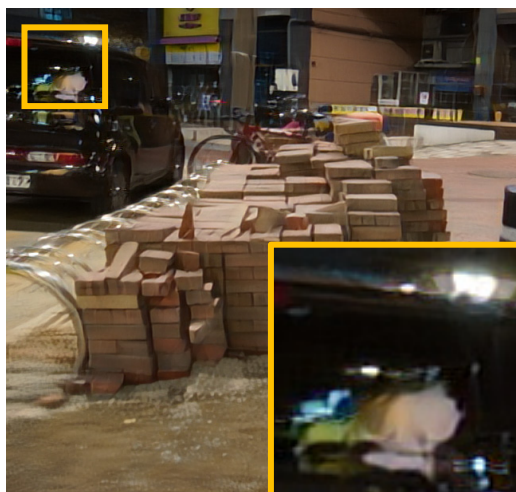

(j) DeblurGAN-v2\* [8]  
25.66/0.7646

# Additional examples of RealBlur-J (1)

Purple: optimization-based methods. Black: deep learning-based methods. Blue\*: deep learning-based methods trained with our dataset.

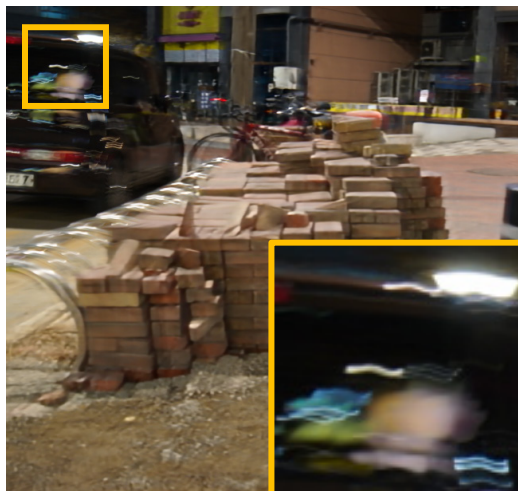

(k) SRN-DeblurNet [9]  
25.03/0.7853

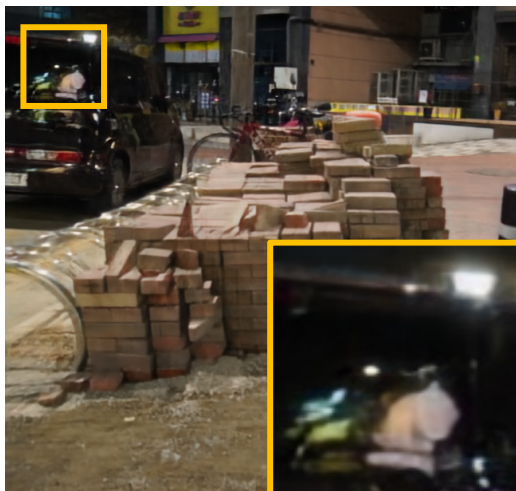

(l) SRN-DeblurNet\* [9]  
27.26/0.8239

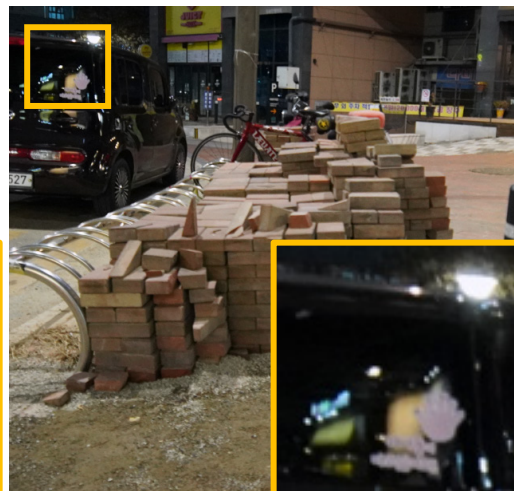

(m) Ground truth

# Additional examples of RealBlur-J (2)

Purple: optimization-based methods. Black: deep learning-based methods. Blue\*: deep learning-based methods trained with our dataset.

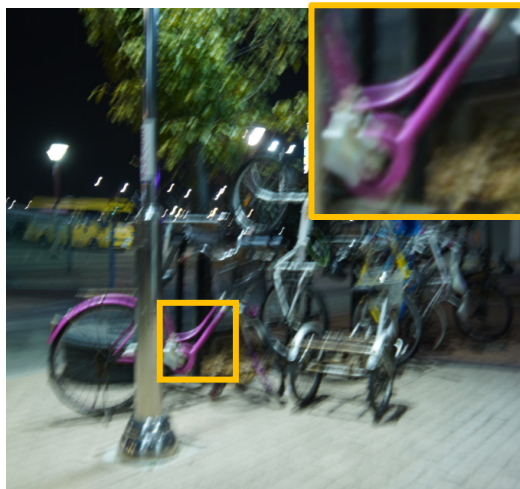

(a) Blurred image  
PSNR/SSIM

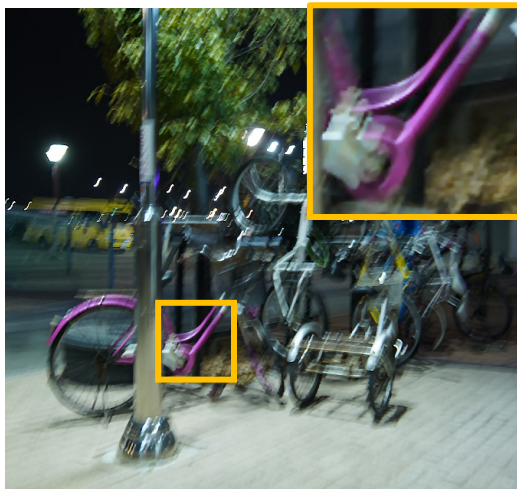

(b) Xu et al. [1]  
20.59/0.6451

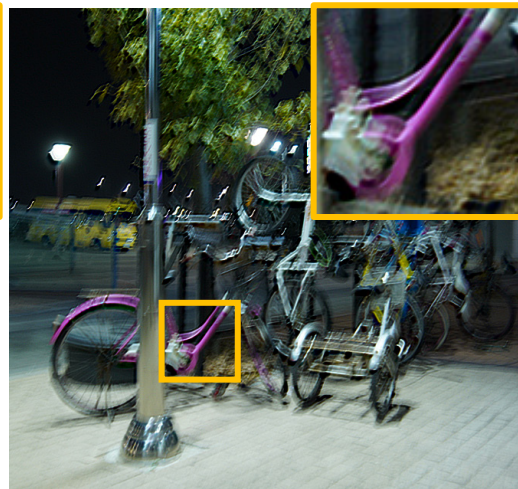

(c) Pan et al. [2]  
19.77/0.5497

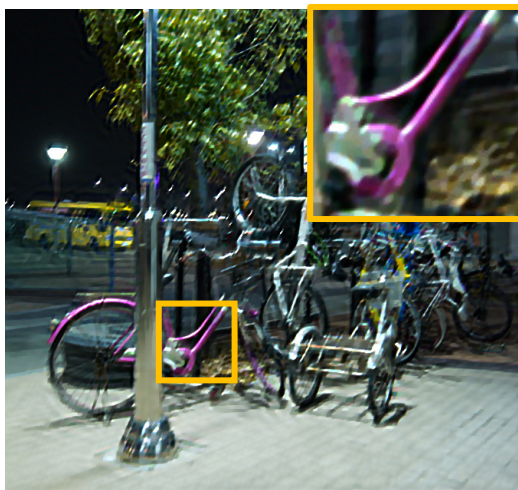

(d) Hu et al. [3]  
21.65/0.7055

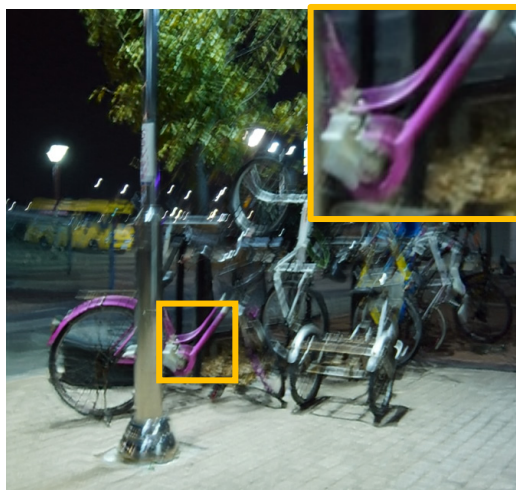

(e) Nah et al. [4]  
21.10/0.6619

# Additional examples of RealBlur-J (2)

Purple: optimization-based methods. Black: deep learning-based methods. Blue\*: deep learning-based methods trained with our dataset.

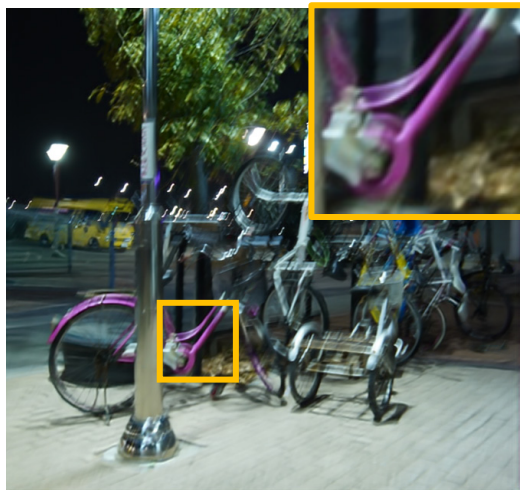

(f) Zhang et al. [5]  
21.50/0.6997

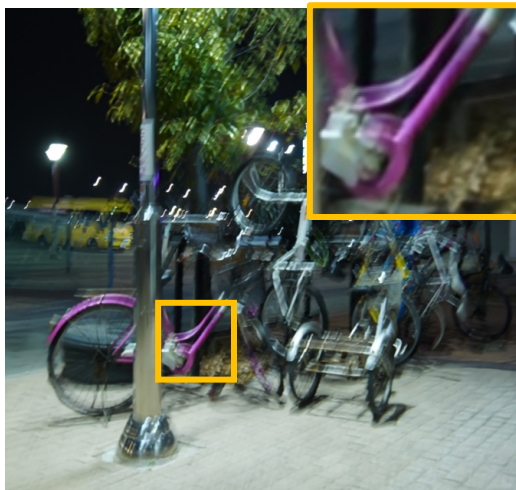

(g) Zhang et al. [6]  
21.09/0.6755

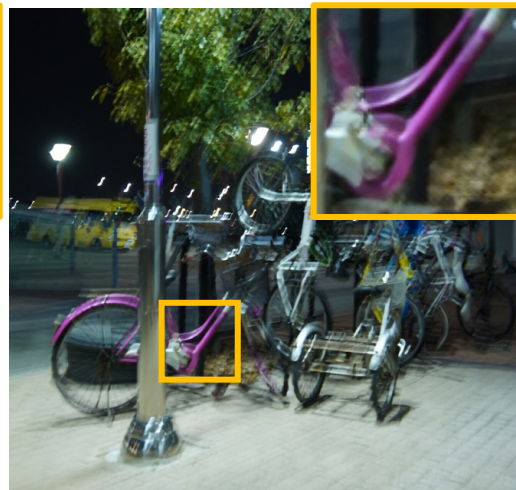

(h) DeblurGAN [7]  
21.01/0.6621

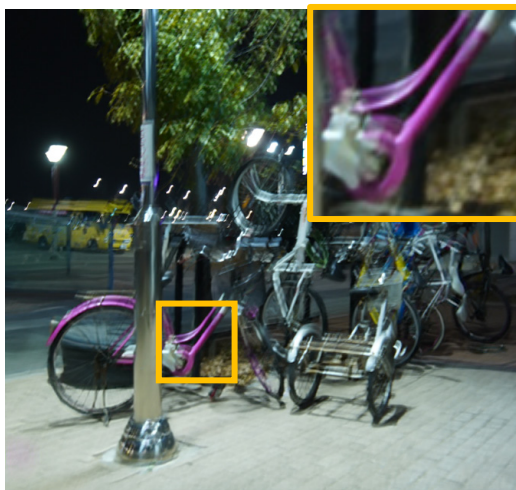

(i) DeblurGAN-v2 [8]  
21.82/0.7214

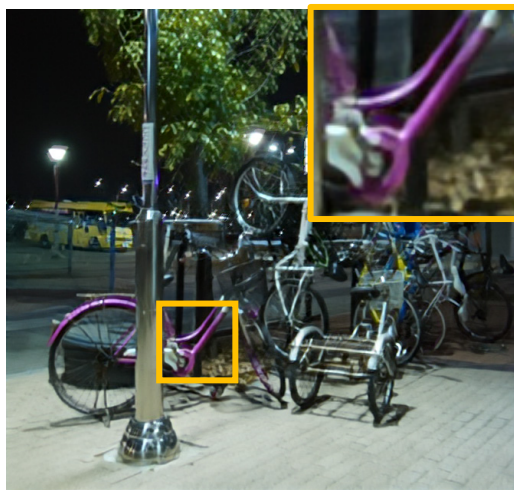

(j) DeblurGAN-v2\* [8]  
24.46/0.7913

# Additional examples of RealBlur-J (2)

Purple: optimization-based methods. Black: deep learning-based methods. Blue\*: deep learning-based methods trained with our dataset.

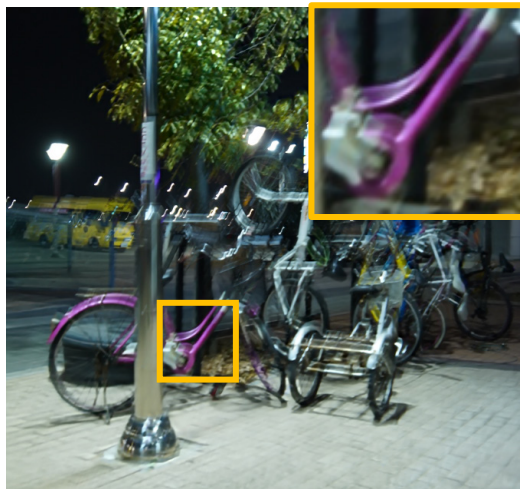

(k) SRN-DeblurNet [9]  
22.12/0.7463

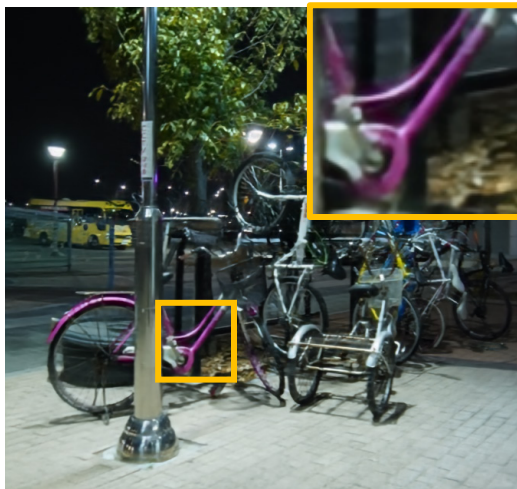

(l) SRN-DeblurNet\* [9]  
26.63/0.8635

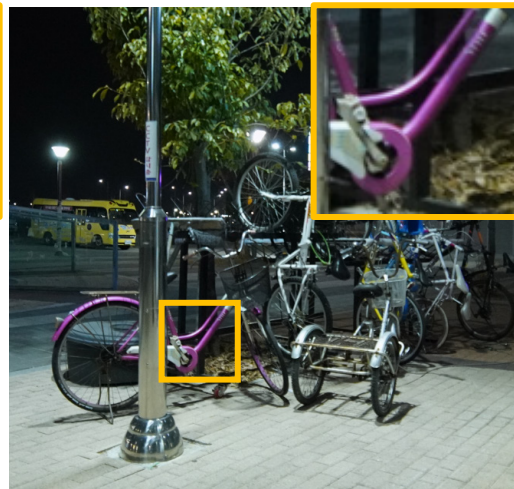

(m) Ground truth

# Additional examples of RealBlur-J (3)

Purple: optimization-based methods. Black: deep learning-based methods. Blue\*: deep learning-based methods trained with our dataset.

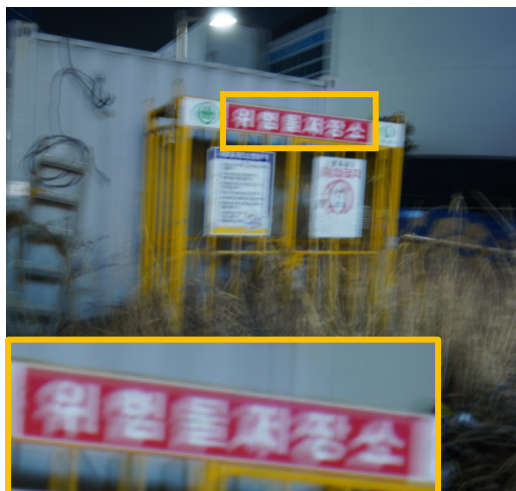

(a) Blurred image  
PSNR/SSIM

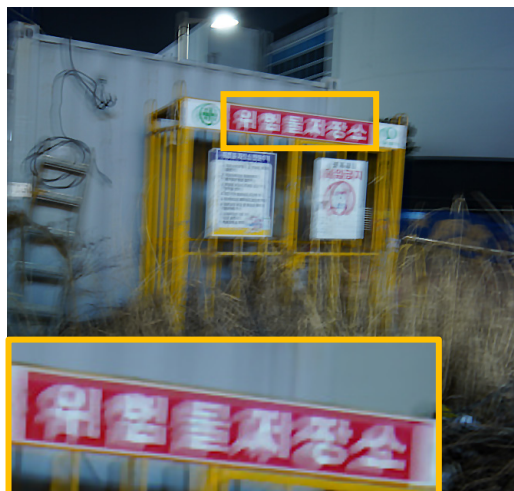

(b) Xu et al. [1]  
23.52/0.6538

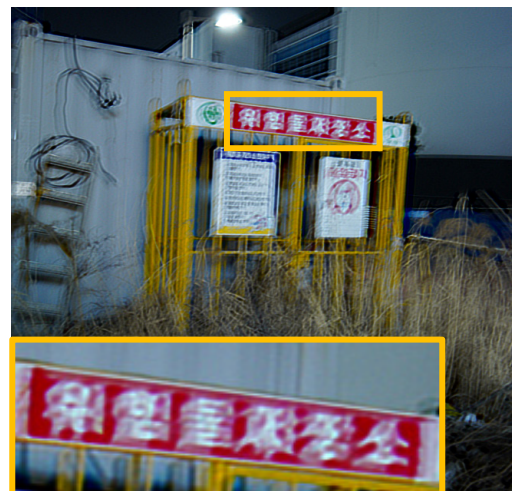

(c) Pan et al. [2]  
22.51/0.5746

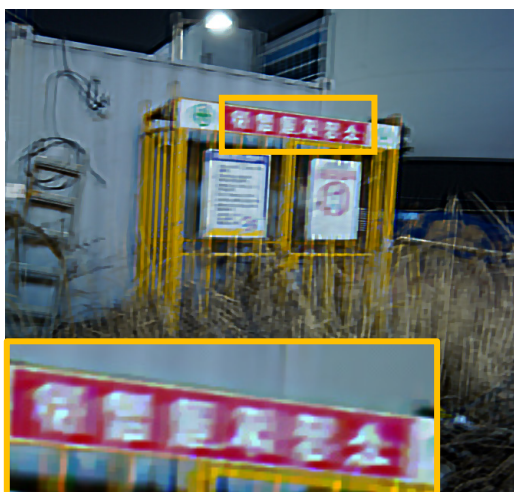

(d) Hu et al. [3]  
23.49/0.6854

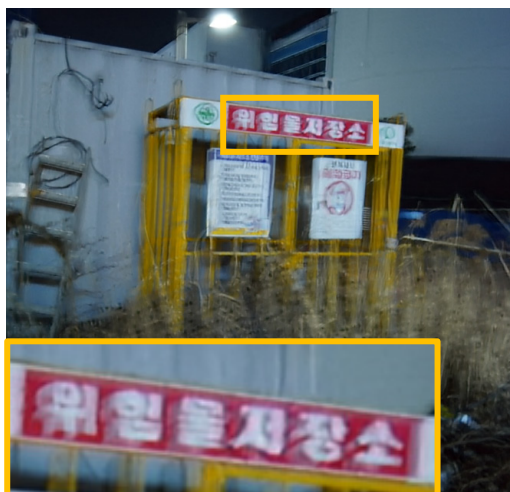

(e) Nah et al. [4]  
24.29/0.6985

# Additional examples of RealBlur-J (3)

Purple: optimization-based methods. Black: deep learning-based methods. Blue\*: deep learning-based methods trained with our dataset.

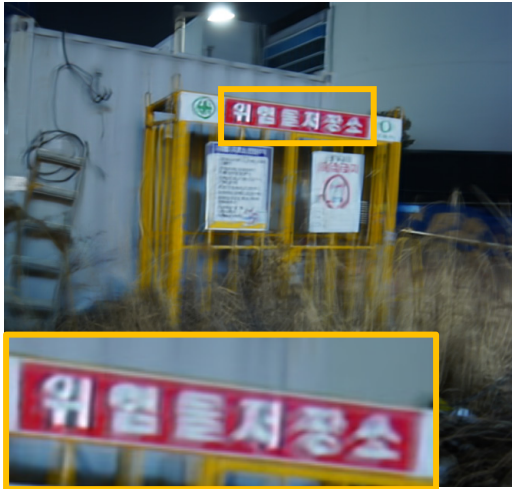

(f) Zhang et al. [5]  
24.42/0.6872

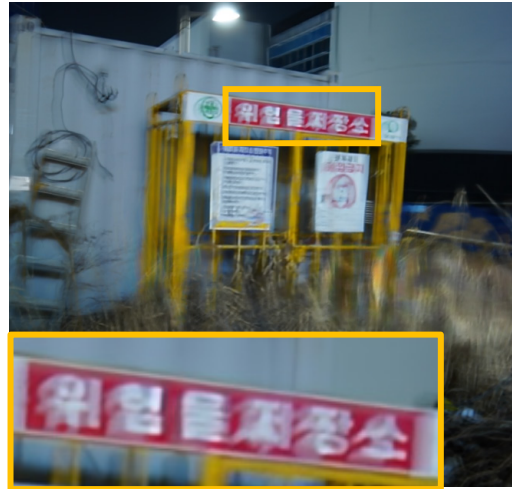

(g) Zhang et al. [6]  
23.77/0.6844

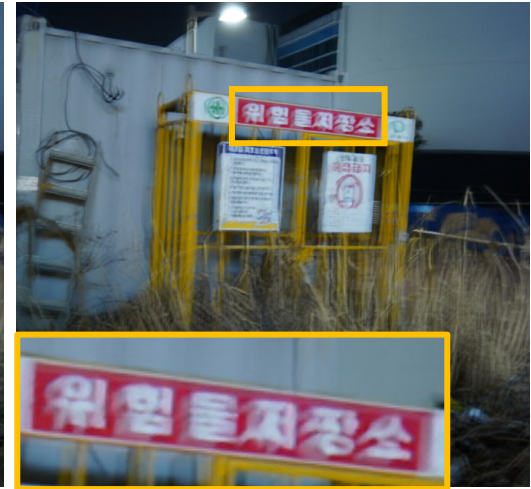

(h) DeblurGAN [7]  
24.60/0.7144

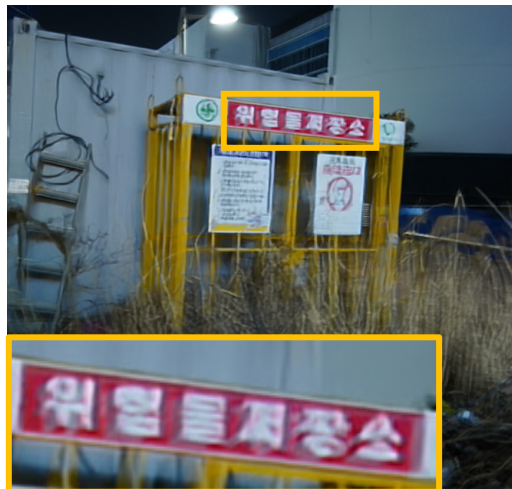

(i) DeblurGAN-v2 [8]  
25.80/0.7741

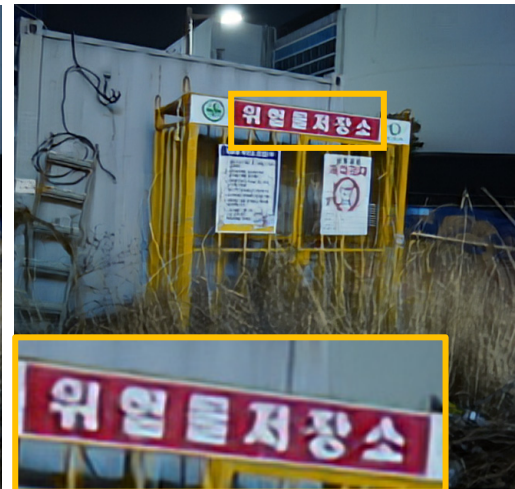

(j) DeblurGAN-v2\* [8]  
26.99/0.8038

# Additional examples of RealBlur-J (3)

Purple: optimization-based methods. Black: deep learning-based methods. Blue\*: deep learning-based methods trained with our dataset.

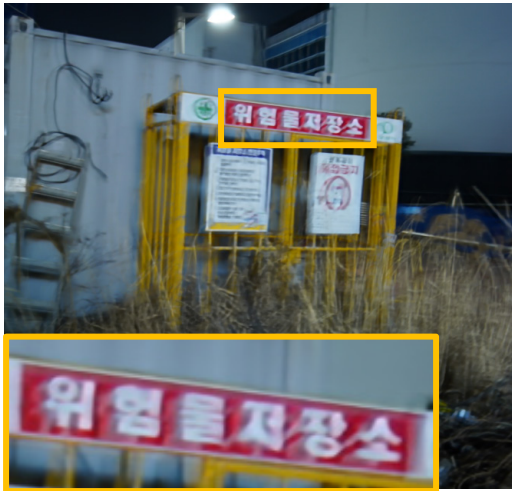

(k) SRN-DeblurNet [9]  
25.19/0.7428

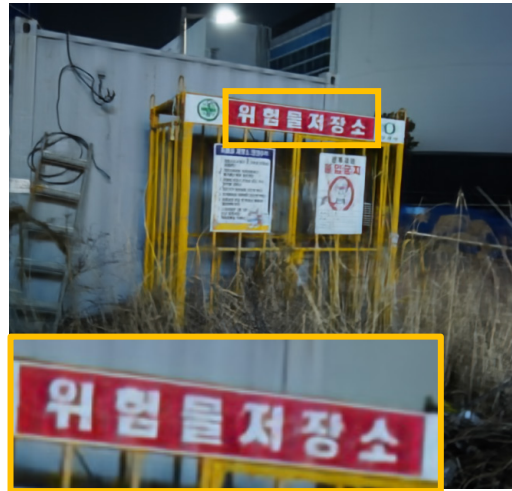

(l) SRN-DeblurNet\* [9]  
29.22/0.8593

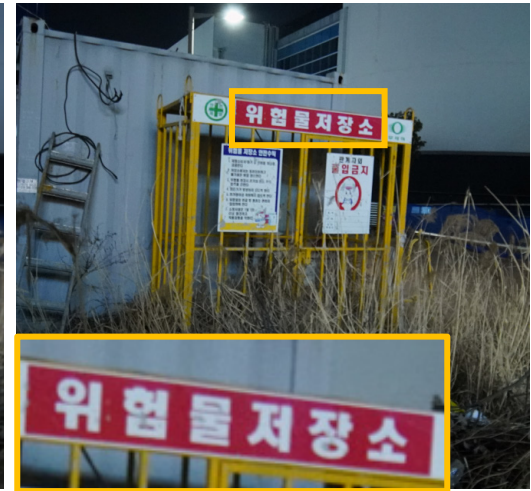

(m) Ground truth

# Additional examples of RealBlur-R (1)

Purple: optimization-based methods. Black: deep learning-based methods. Blue\*: deep learning-based methods trained with our dataset.

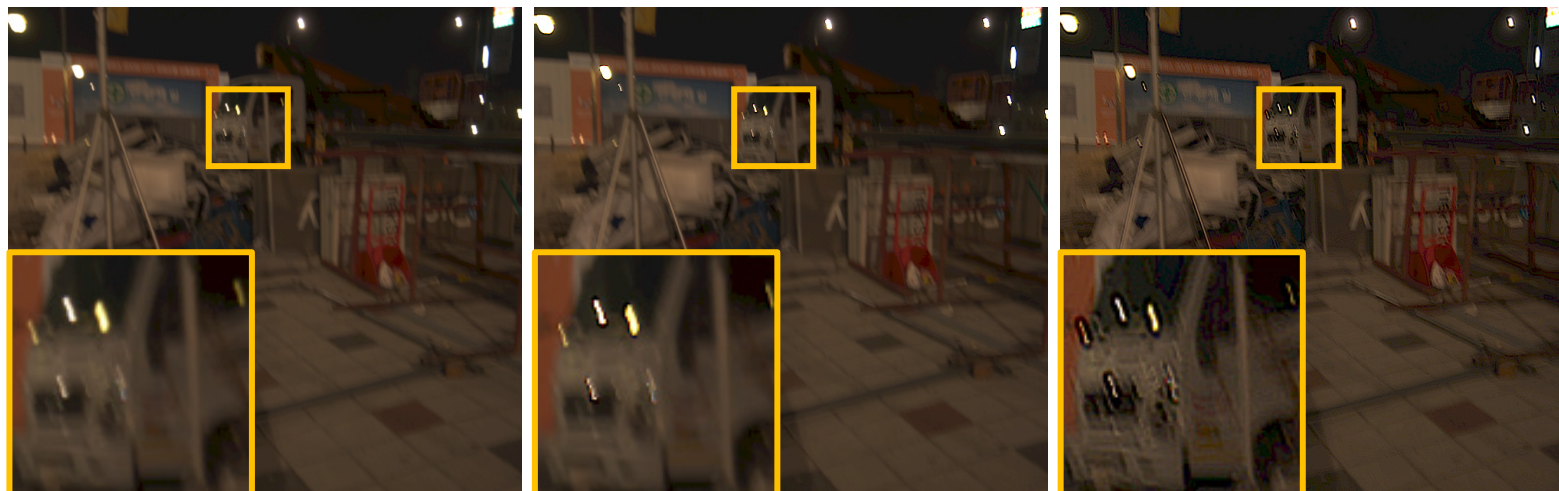

(a) Blurred image  
PSNR/SSIM

(b) Xu et al. [1]  
30.87/0.9223

(c) Pan et al. [2]  
31.63/0.9271

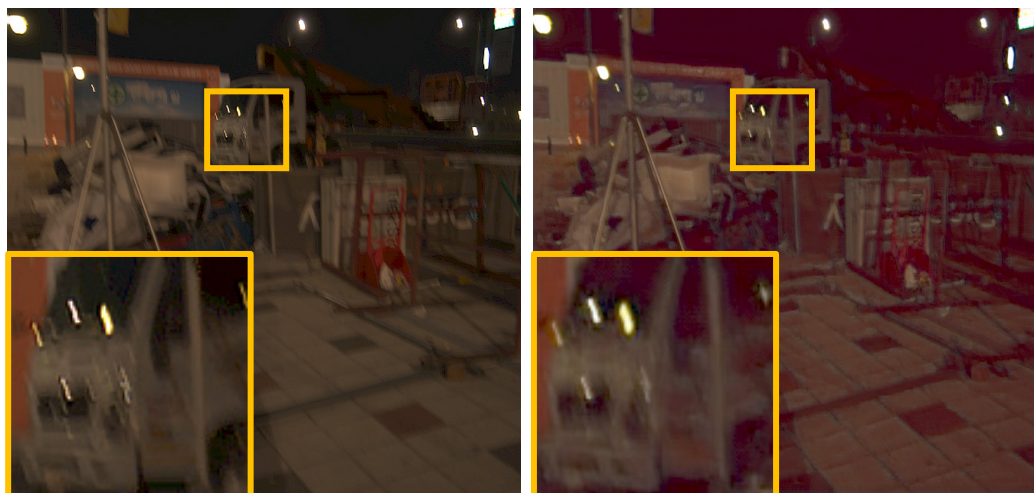

(d) Hu et al. [3]  
31.22/0.9250

(e) Nah et al. [4]  
30.74/0.8284

# Additional examples of RealBlur-R (1)

Purple: optimization-based methods. Black: deep learning-based methods. Blue\*: deep learning-based methods trained with our dataset.

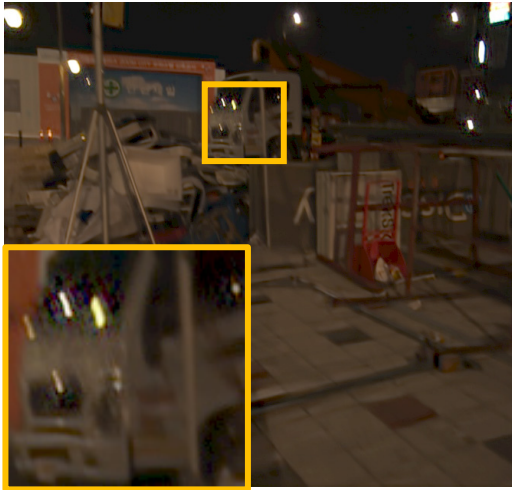

(f) Zhang et al. [5]  
31.49/0.9343

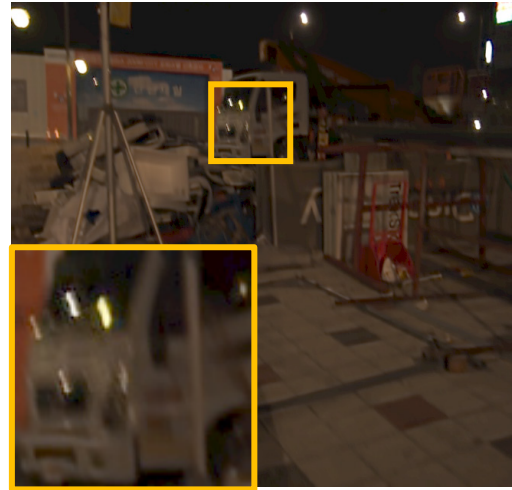

(g) Zhang et al. [6]  
31.44/0.9390

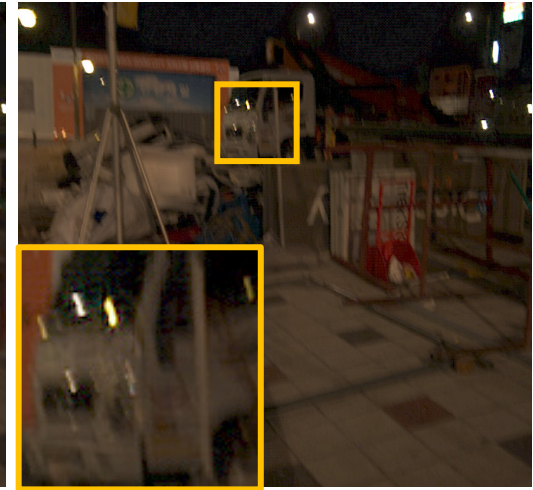

(h) DeblurGAN [7]  
31.02/0.9047

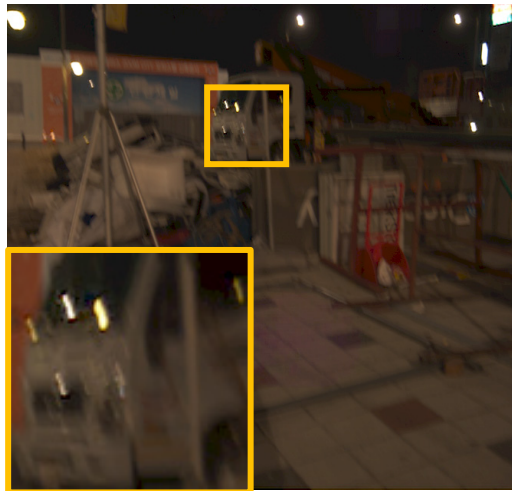

(i) DeblurGAN-v2 [8]  
31.22/0.9286

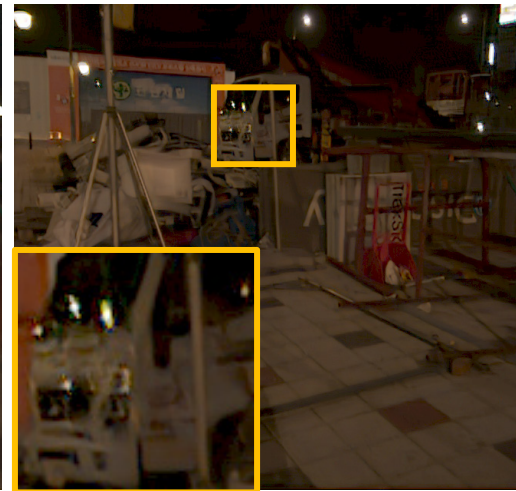

(j) DeblurGAN-v2\* [8]  
34.69/0.9281

# Additional examples of RealBlur-R (1)

Purple: optimization-based methods. Black: deep learning-based methods. Blue\*: deep learning-based methods trained with our dataset.

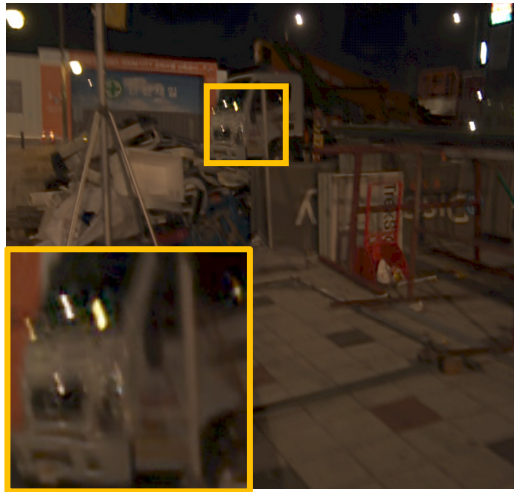

(k) SRN-DeblurNet [9]  
31.39/0.9371

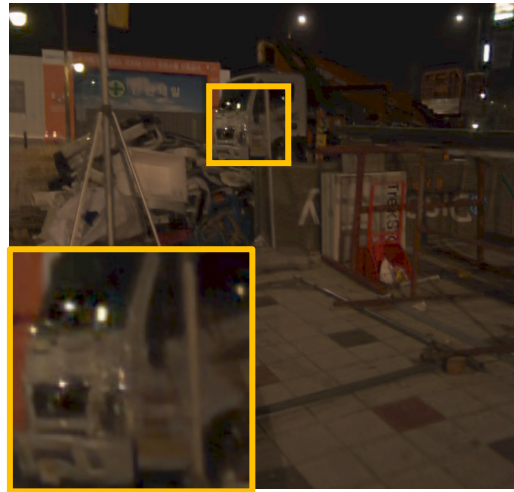

(l) SRN-DeblurNet\* [9]  
37.04/0.9625

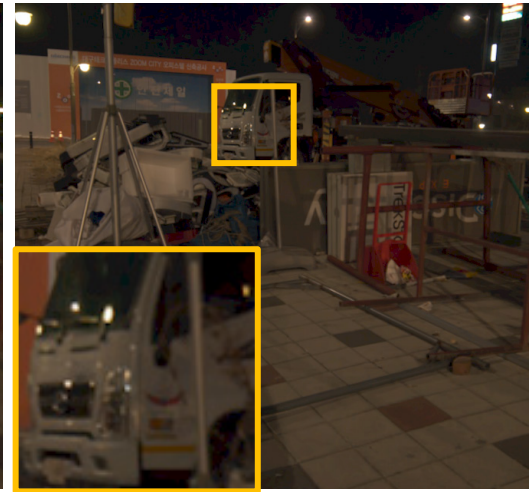

(m) Ground truth

# Additional examples of RealBlur-R (2)

Purple: optimization-based methods. Black: deep learning-based methods. Blue\*: deep learning-based methods trained with our dataset.

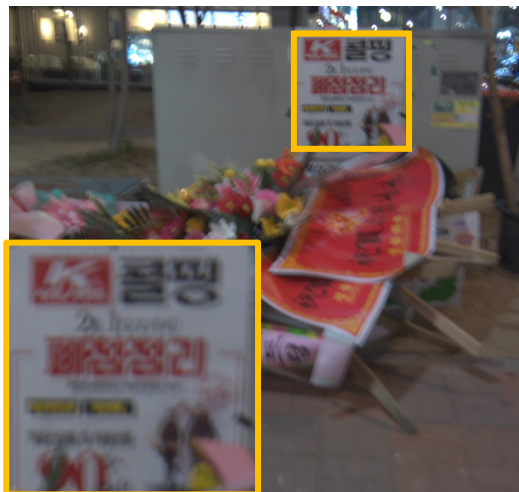

(a) Blurred image  
PSNR/SSIM

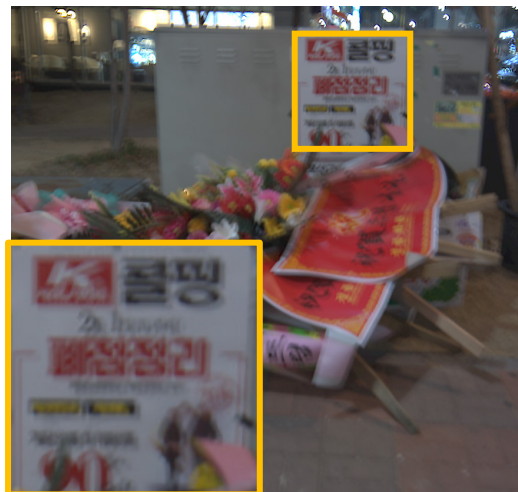

(b) Xu et al. [1]  
25.28/0.8749

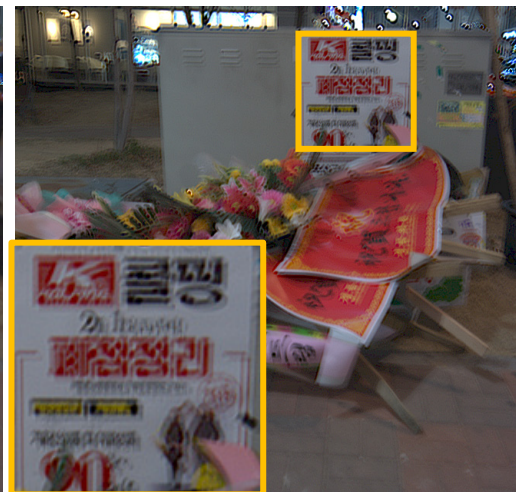

(c) Pan et al. [2]  
25.44/0.8469

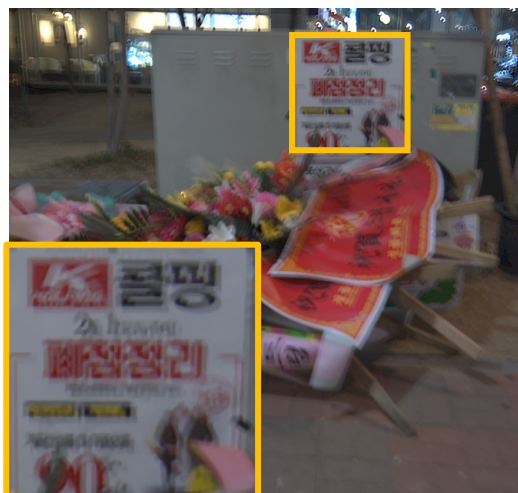

(d) Hu et al. [3]  
25.49/0.8732

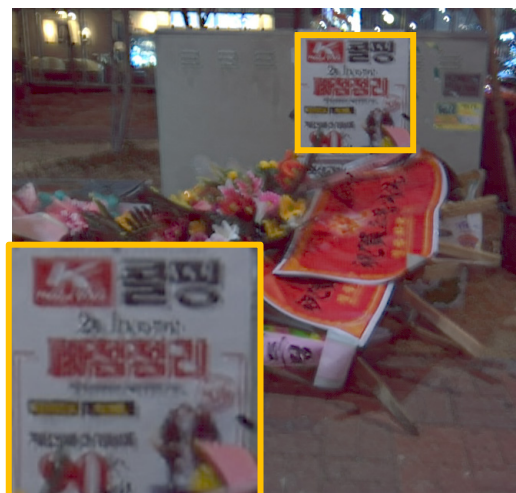

(e) Nah et al. [4]  
25.81/0.8417

# Additional examples of RealBlur-R (2)

Purple: optimization-based methods. Black: deep learning-based methods. Blue\*: deep learning-based methods trained with our dataset.

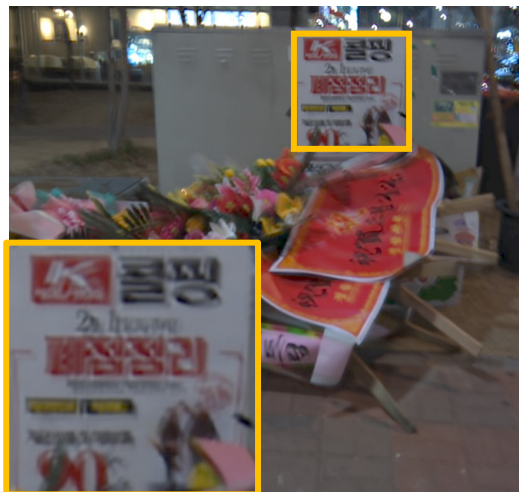

(f) Zhang et al. [5]  
26.00/0.8879

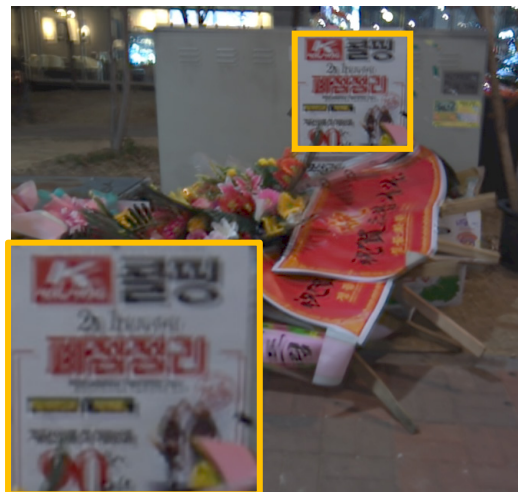

(g) Zhang et al. [6]  
25.94/0.8834

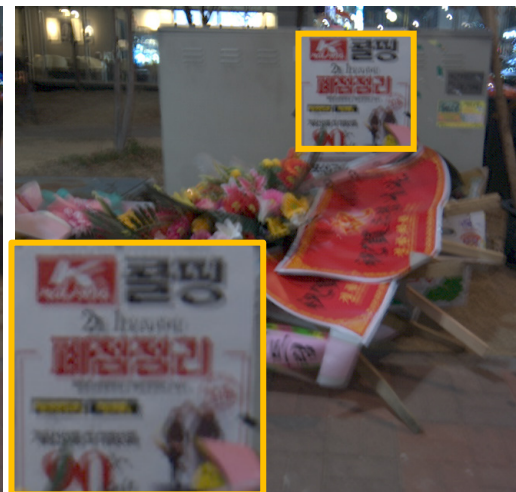

(h) DeblurGAN [7]  
25.74/0.8587

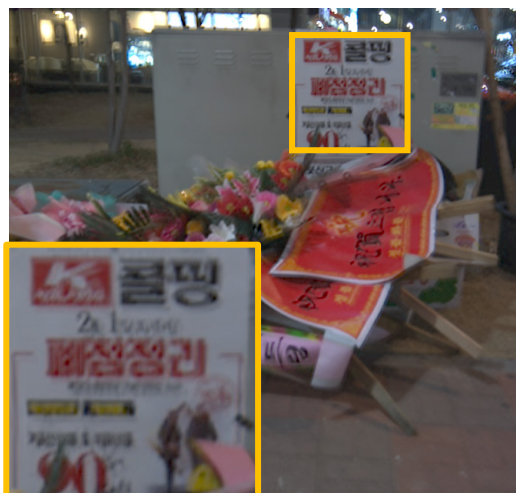

(i) DeblurGAN-v2 [8]  
26.03/0.8949

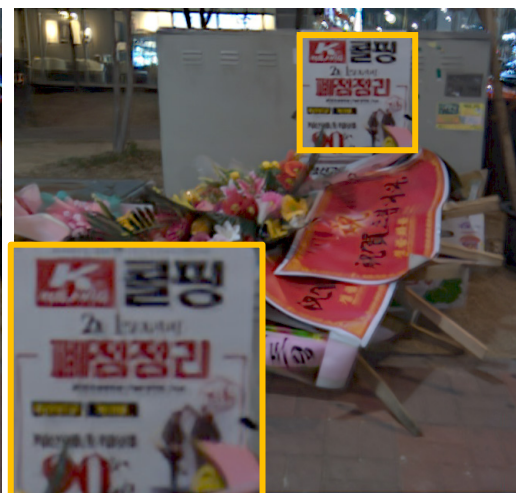

(j) DeblurGAN-v2\* [8]  
27.87/0.8764

# Additional examples of RealBlur-R (2)

Purple: optimization-based methods. Black: deep learning-based methods. Blue\*: deep learning-based methods trained with our dataset.

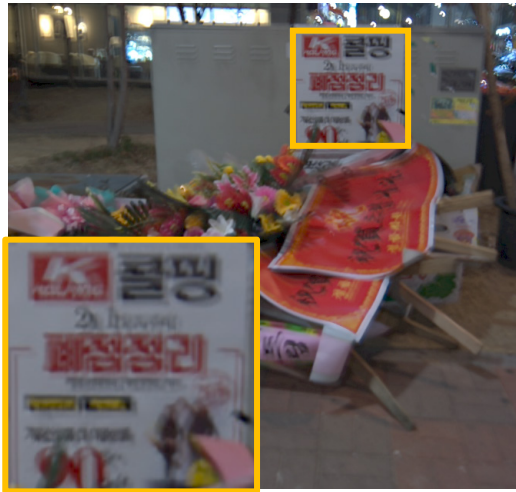

(k) SRN-DeblurNet [9]  
25.87/0.8826

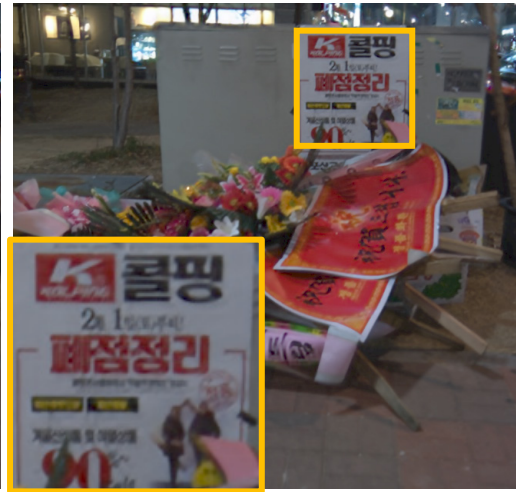

(l) SRN-DeblurNet\* [9]  
29.57/0.9317

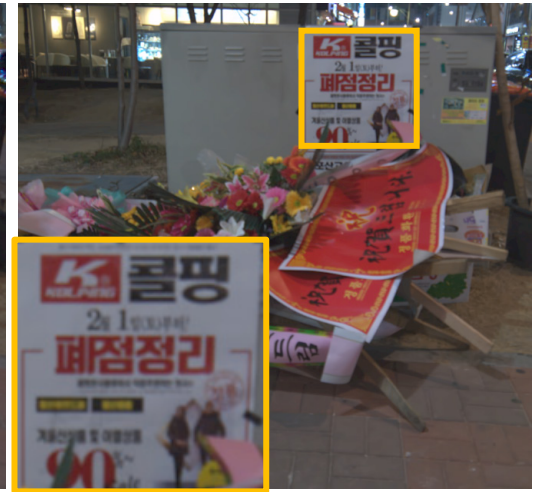

(m) Ground truth

# Additional examples of RealBlur-R (3)

Purple: optimization-based methods. Black: deep learning-based methods. Blue\*: deep learning-based methods trained with our dataset.

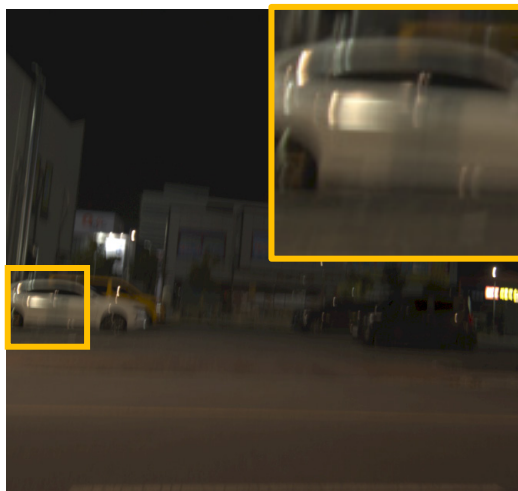

(a) Blurred image  
PSNR/SSIM

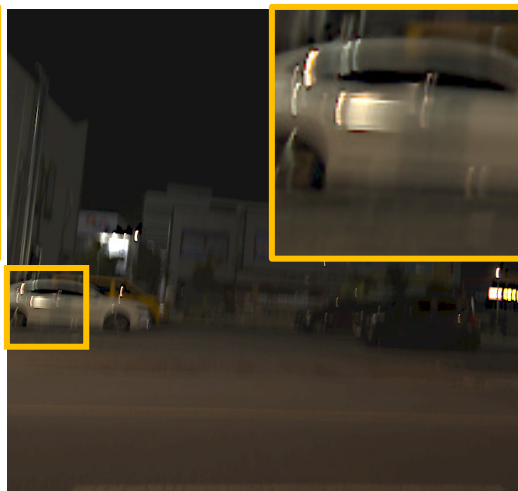

(b) Xu et al. [1]  
31.99/0.9377

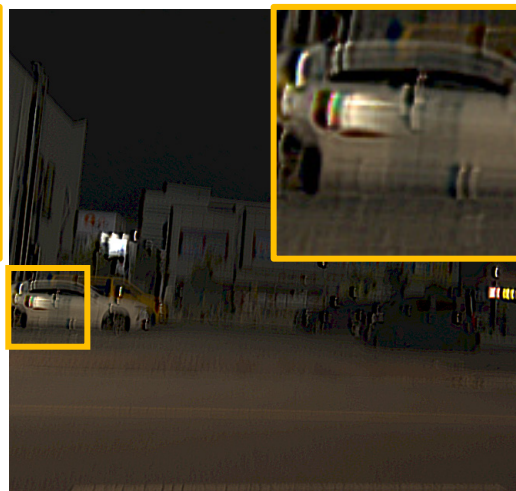

(c) Pan et al. [2]  
31.47/0.9379

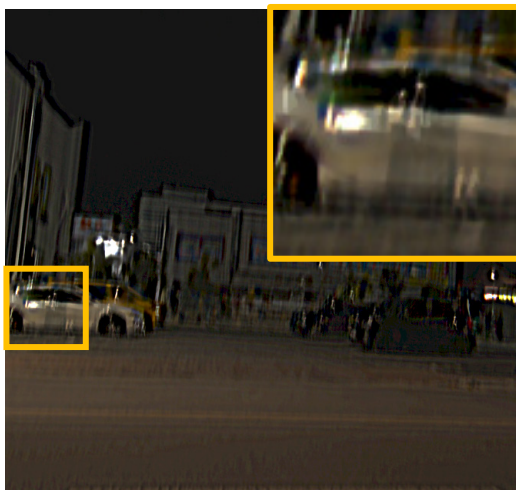

(d) Hu et al. [3]  
32.13/0.9283

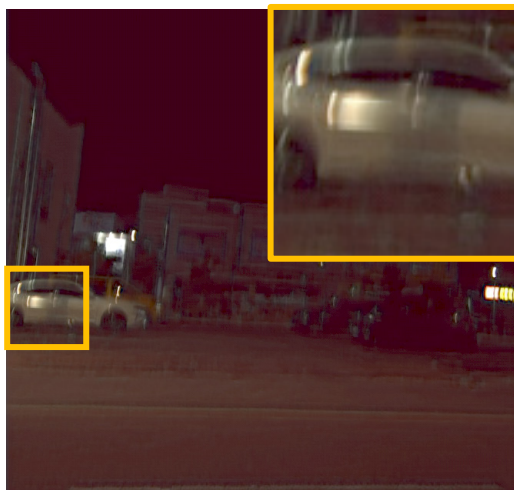

(e) Nah et al. [4]  
31.39/0.7982

# Additional examples of RealBlur-R (3)

Purple: optimization-based methods. Black: deep learning-based methods. Blue\*: deep learning-based methods trained with our dataset.

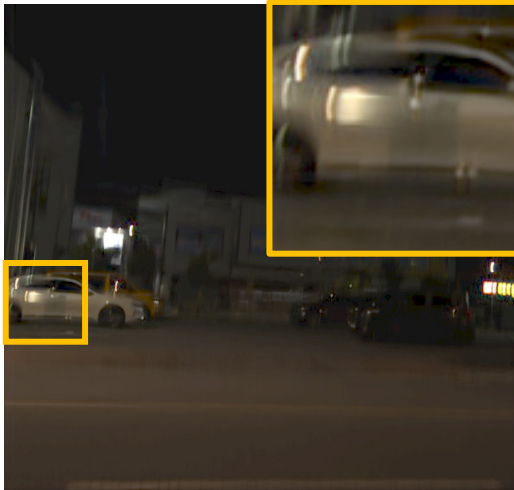

(f) Zhang et al. [5]  
32.68/0.9534

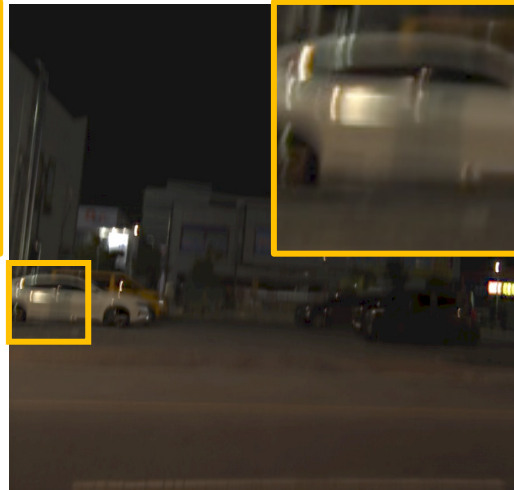

(g) Zhang et al. [6]  
32.53/0.9493

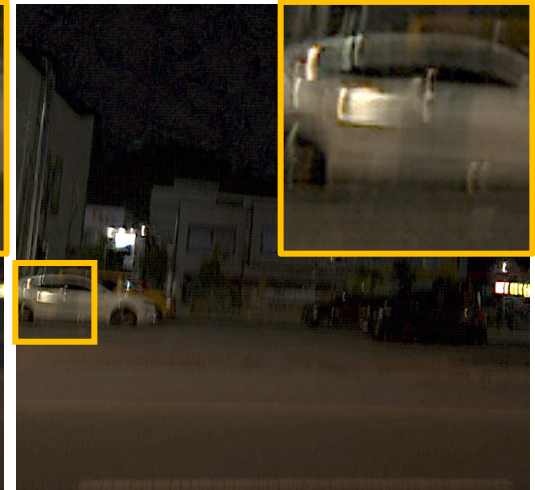

(h) DeblurGAN [7]  
31.91/0.9034

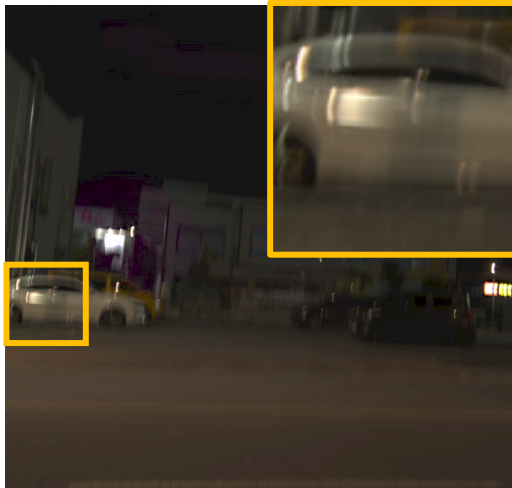

(i) DeblurGAN-v2 [8]  
32.37/0.9488

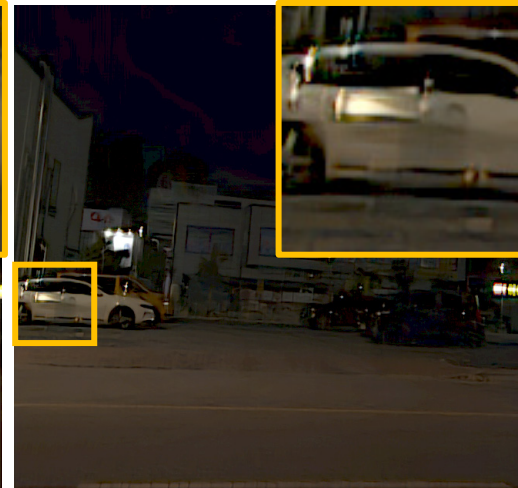

(j) DeblurGAN-v2\* [8]  
36.38/0.9413

# Additional examples of RealBlur-R (3)

Purple: optimization-based methods. Black: deep learning-based methods. Blue\*: deep learning-based methods trained with our dataset.

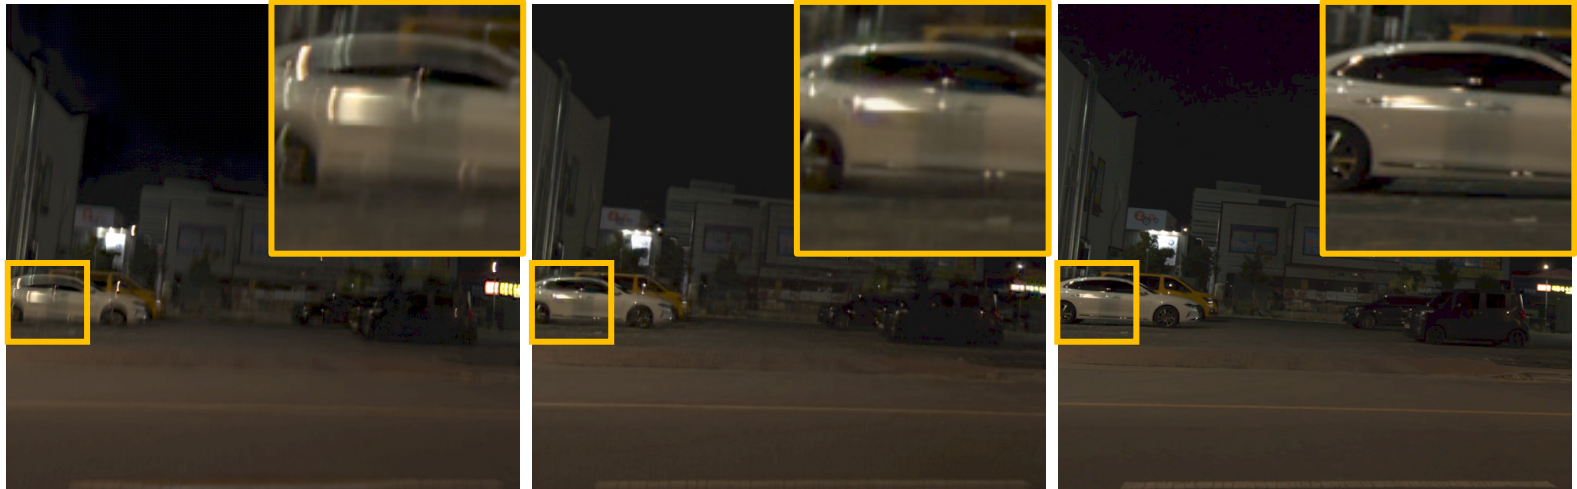

(k) SRN-DeblurNet [9]  
32.48/0.9316

(l) SRN-DeblurNet\* [9]  
40.02/0.9681

(m) Ground truth

# Additional examples of dynamic scenes (1)

Black: deep learning-based methods. Blue\*: deep learning-based methods trained with our dataset.

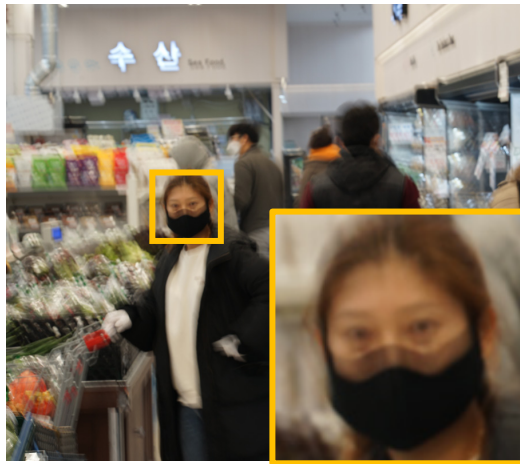

(a) Blurred image

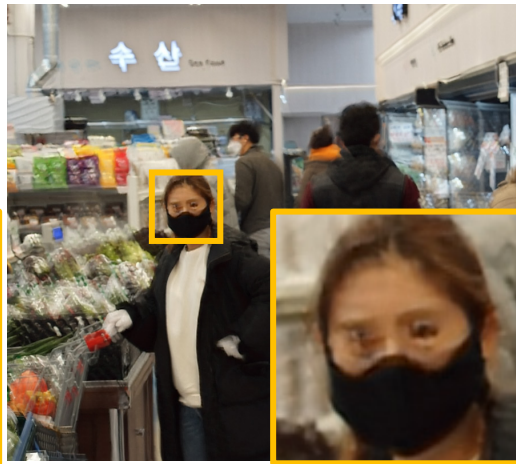

(b) Nah et al. [4]

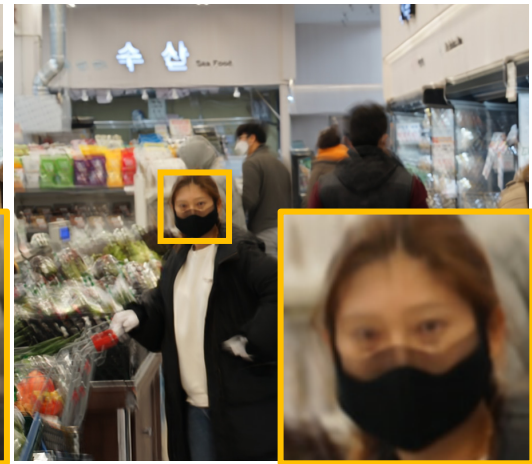

(c) Zhang et al. [5]

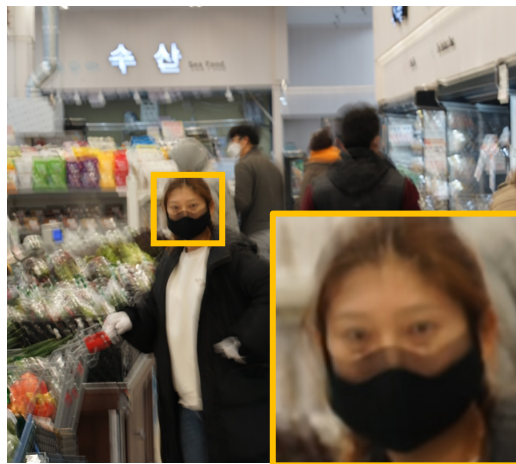

(d) Zhang et al. [6]

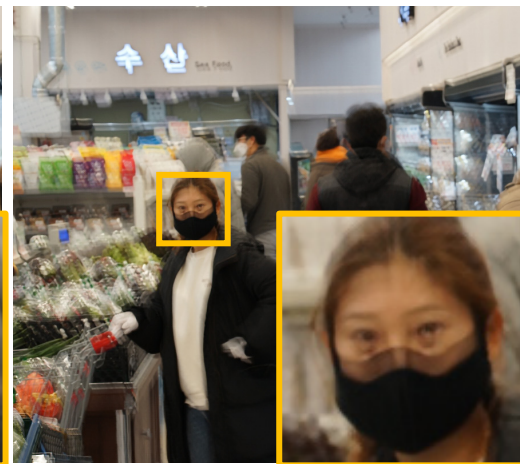

(e) DeblurGAN [7]

# Additional examples of dynamic scenes (1)

Black: deep learning-based methods. Blue\*: deep learning-based methods trained with our dataset.

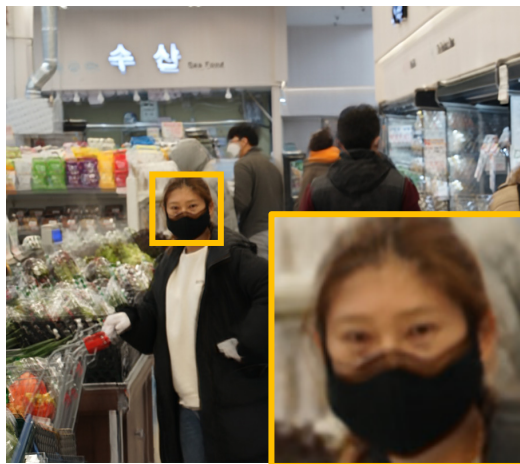

(f) DeblurGAN-v2 [8]

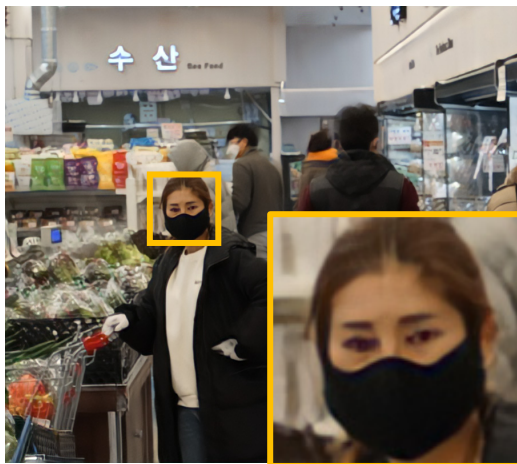

(g) DeblurGAN-v2 [8]  
RealBlur-J

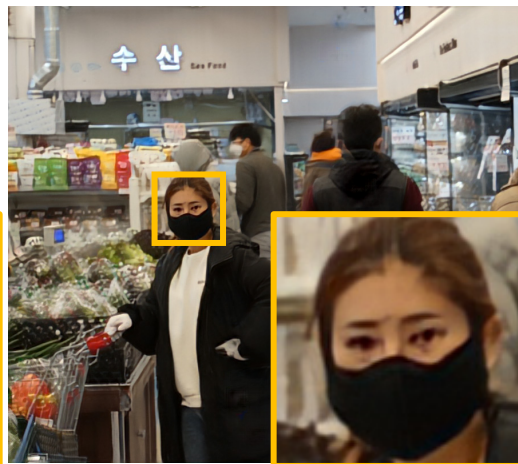

(h) DeblurGAN-v2 [8]  
RealBlur-J+GoPro+BSD-B

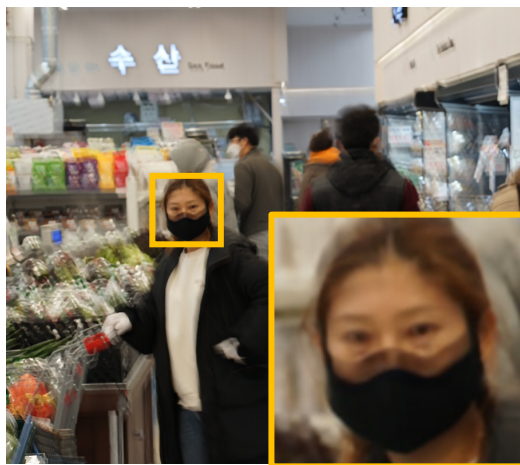

(i) SRN-DeblurNet [9]

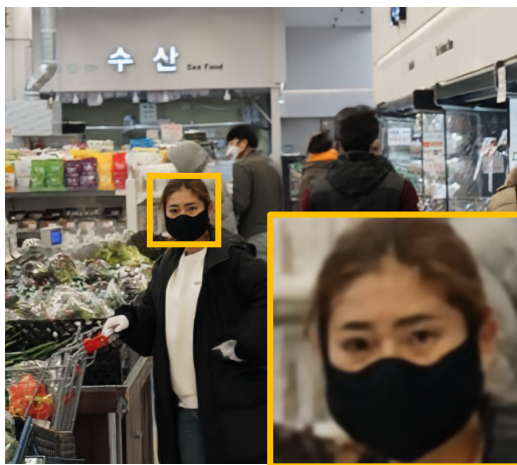

(j) SRN-DeblurNet [9]  
RealBlur-J

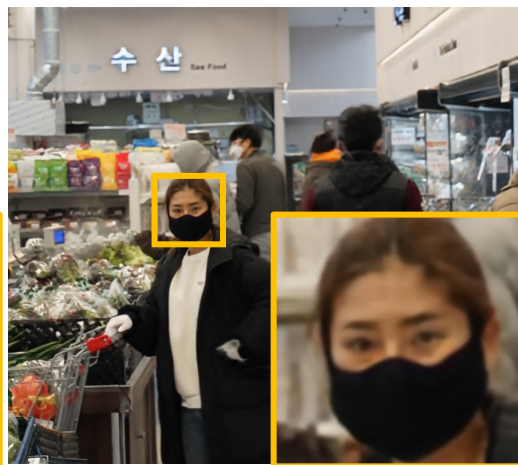

(k) SRN-DeblurNet [9]  
RealBlur-J+GoPro+BSD-B

# Additional examples of dynamic scenes (2)

Black: deep learning-based methods. Blue\*: deep learning-based methods trained with our dataset.

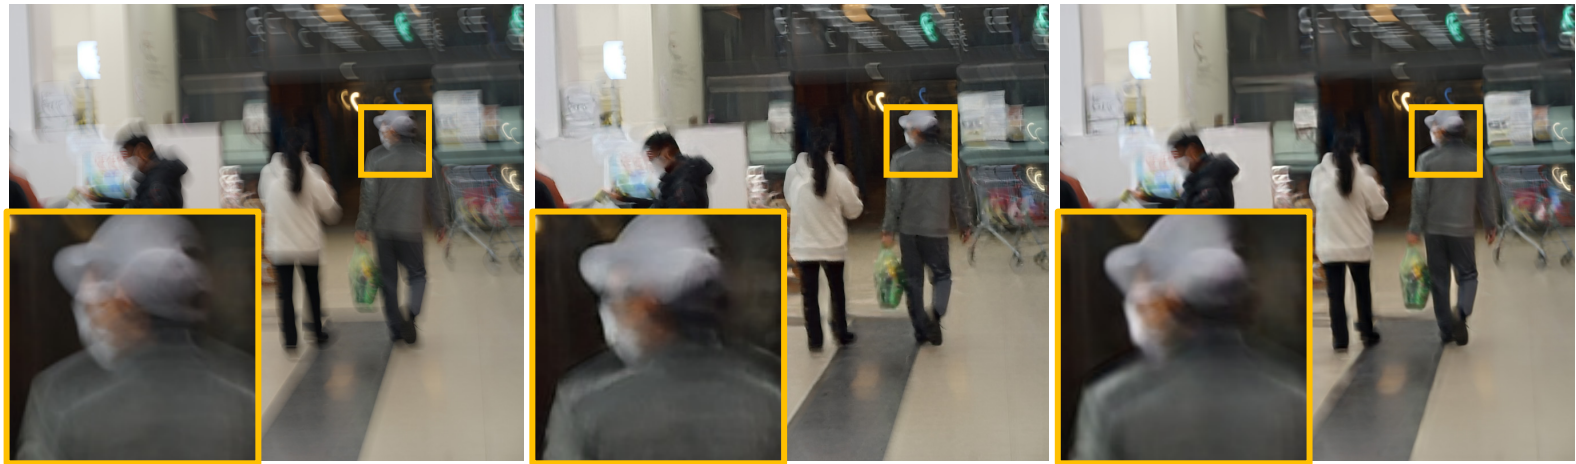

(a) Blurred image

(b) Nah et al. [4]

(c) Zhang et al. [5]

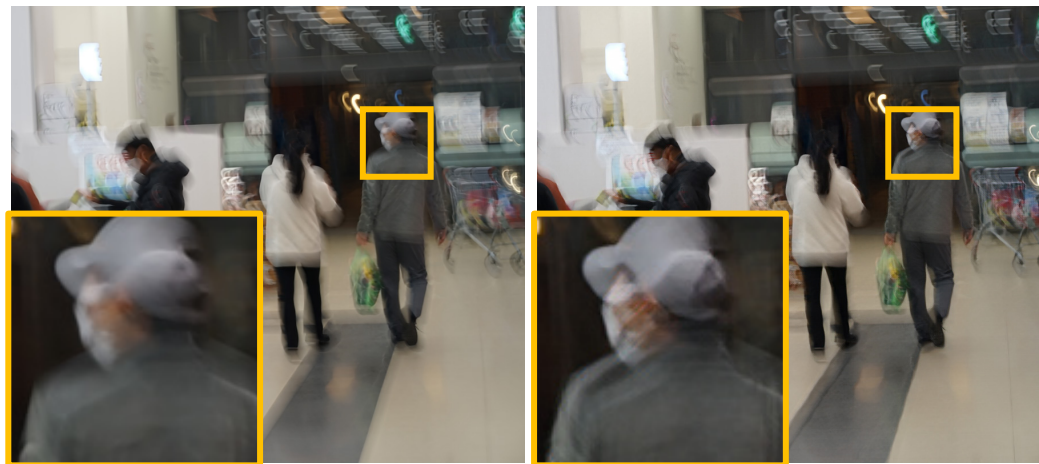

(d) Zhang et al. [6]

(e) DeblurGAN [7]

# Additional examples of dynamic scenes (2)

Black: deep learning-based methods. Blue\*: deep learning-based methods trained with our dataset.

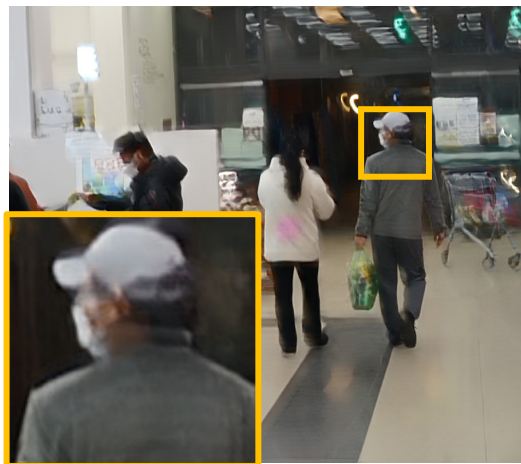

(f) DeblurGAN-v2 [8]

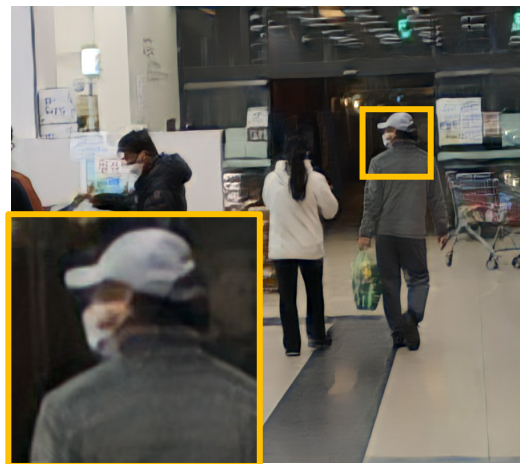

(g) DeblurGAN-v2 [8]  
RealBlur-J

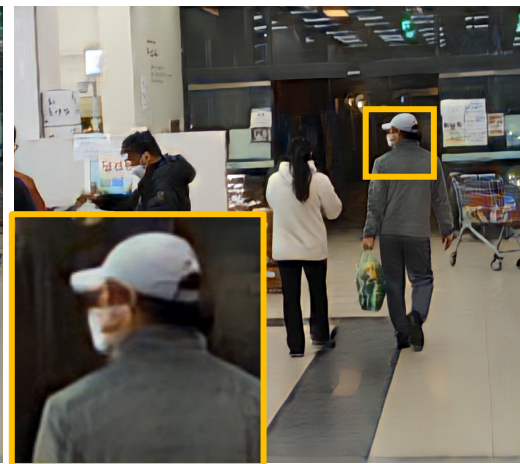

(h) DeblurGAN-v2 [8]  
RealBlur-J+GoPro+BSD-B

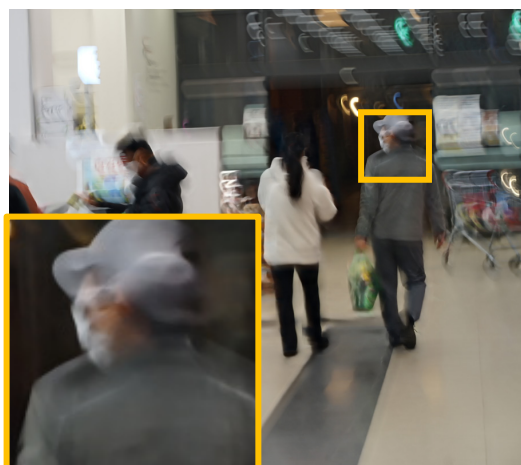

(i) SRN-DeblurNet [9]

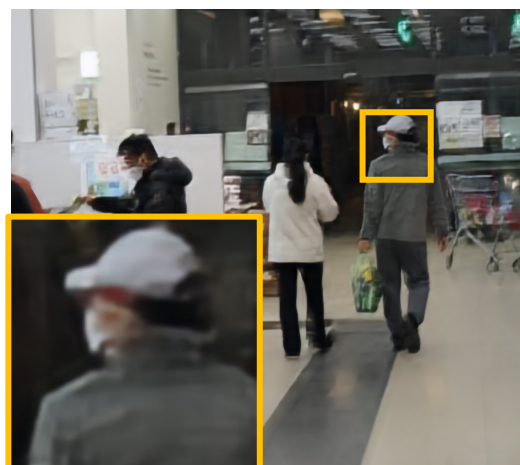

(j) SRN-DeblurNet [9]  
RealBlur-J

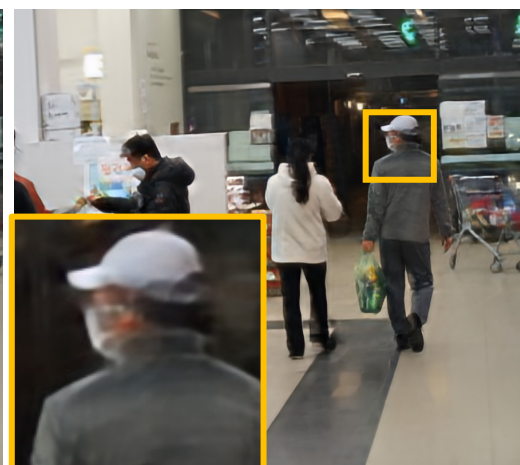

(k) SRN-DeblurNet [9]  
RealBlur-J+GoPro+BSD-B

# Additional examples of dynamic scenes (3)

Black: deep learning-based methods. Blue\*: deep learning-based methods trained with our dataset.

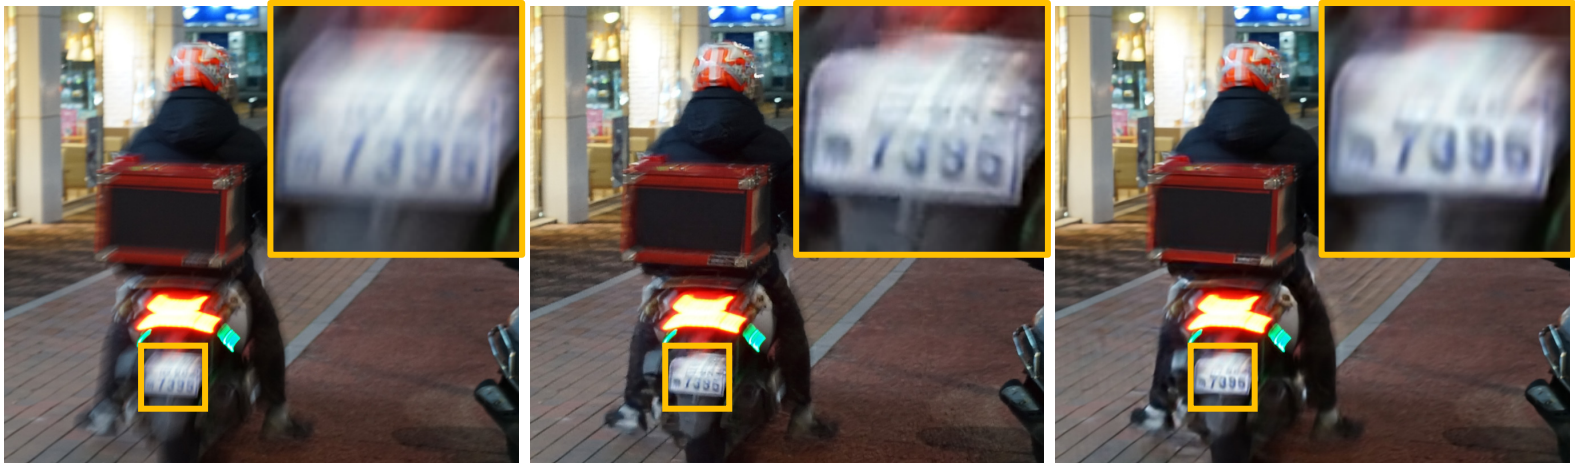

(a) Blurred image

(b) Nah et al. [4]

(c) Zhang et al. [5]

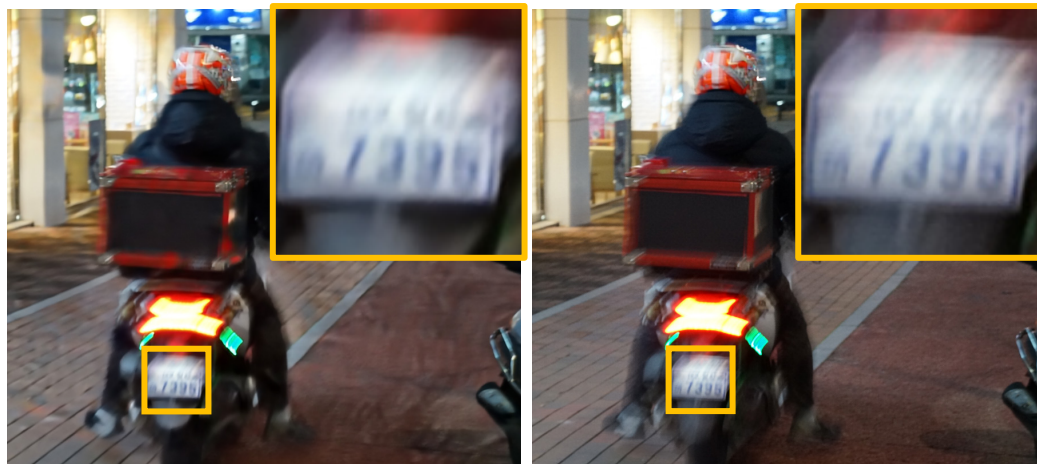

(d) Zhang et al. [6]

(e) DeblurGAN [7]

# Additional examples of dynamic scenes (3)

Black: deep learning-based methods. Blue\*: deep learning-based methods trained with our dataset.

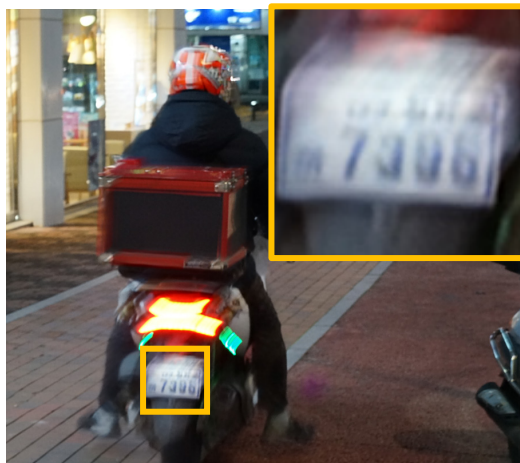

(f) DeblurGAN-v2 [8]

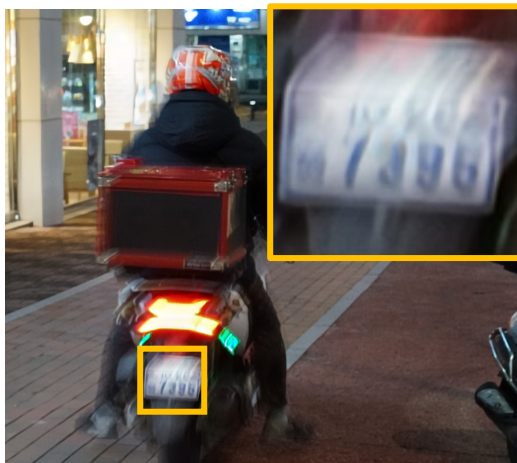

(g) DeblurGAN-v2 [8]  
RealBlur-J

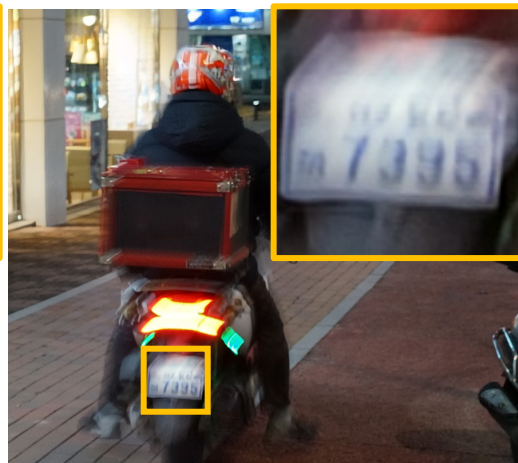

(h) DeblurGAN-v2 [8]  
RealBlur-J+GoPro+BSD-B

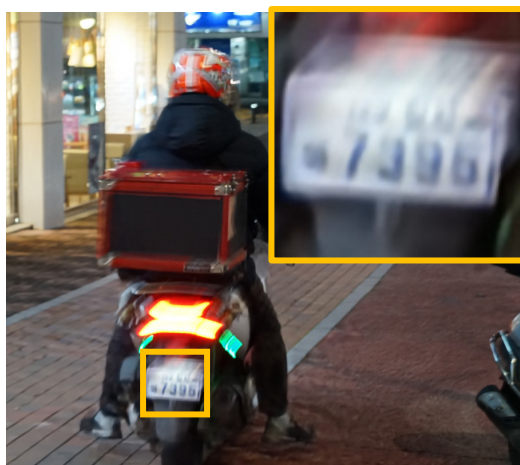

(i) SRN-DeblurNet [9]

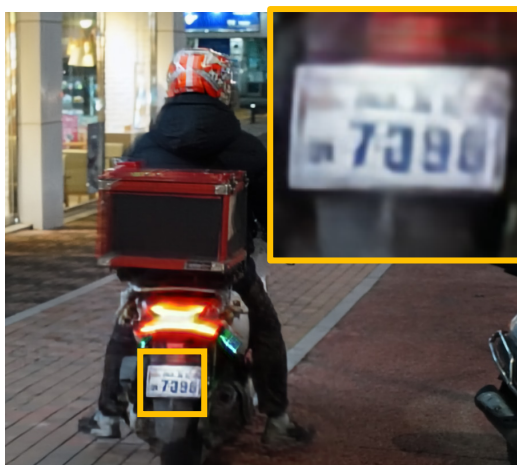

(j) SRN-DeblurNet [9]  
RealBlur-J

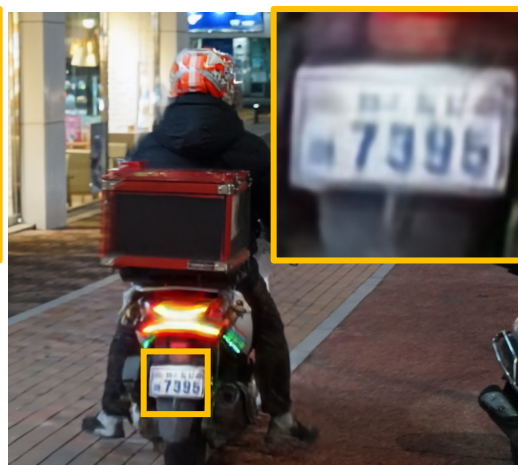

(k) SRN-DeblurNet [9]  
RealBlur-J+GoPro+BSD-B

# Additional examples of dynamic scenes (4)

Black: deep learning-based methods. Blue\*: deep learning-based methods trained with our dataset.

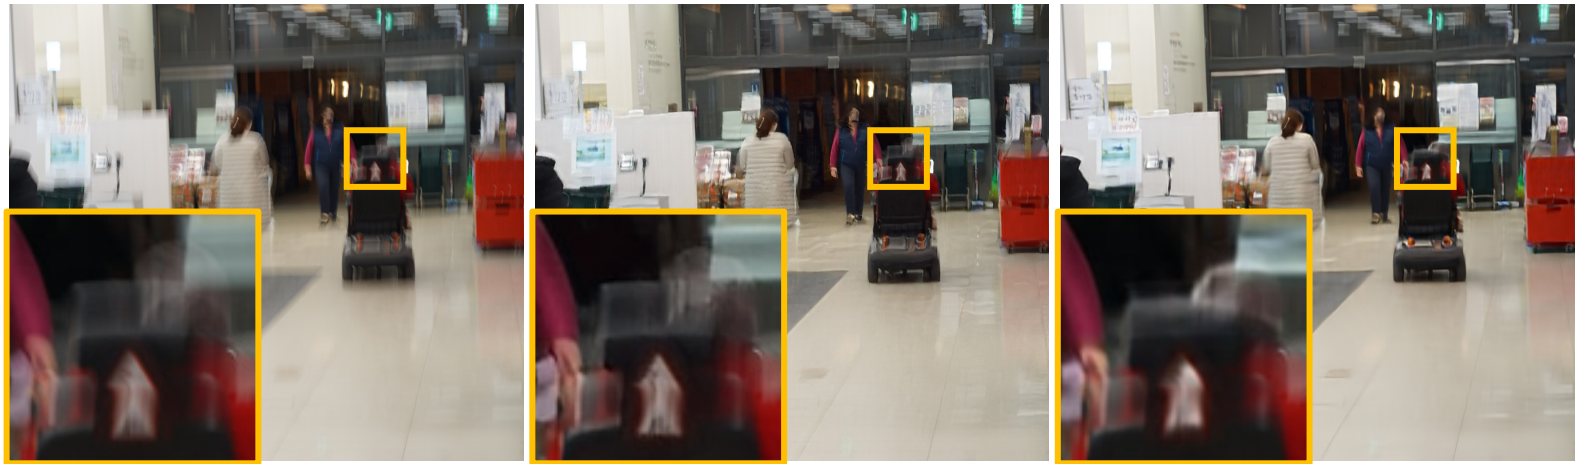

(a) Blurred image

(b) Nah et al. [4]

(c) Zhang et al. [5]

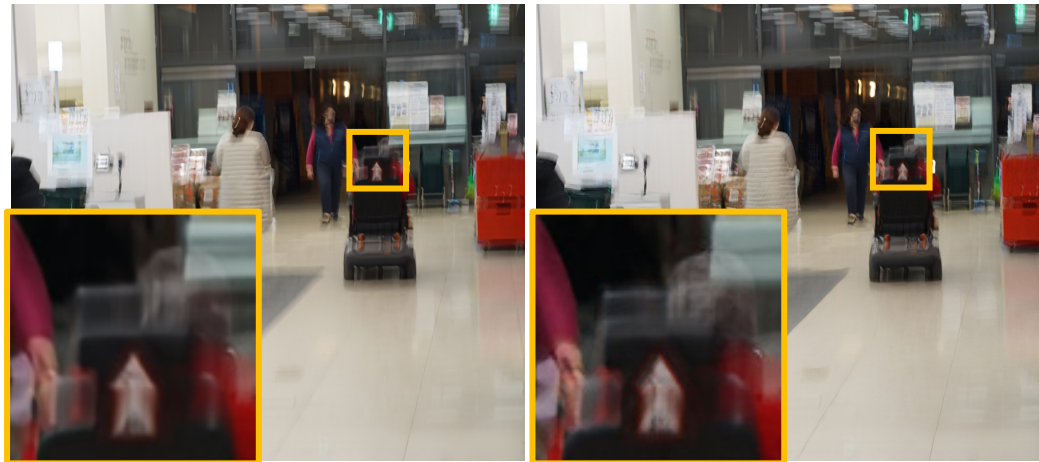

(d) Zhang et al. [6]

(e) DeblurGAN [7]

# Additional examples of dynamic scenes (4)

Black: deep learning-based methods. Blue\*: deep learning-based methods trained with our dataset.

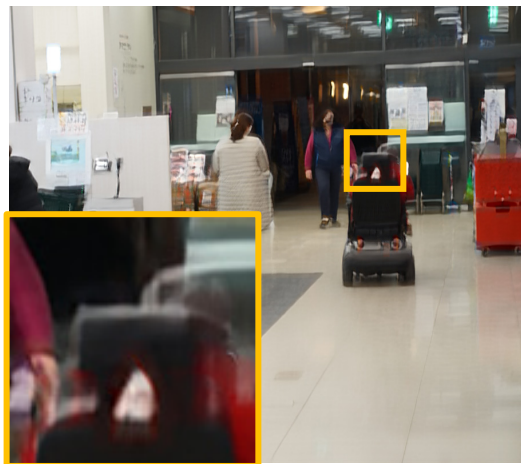

(f) DeblurGAN-v2 [8]

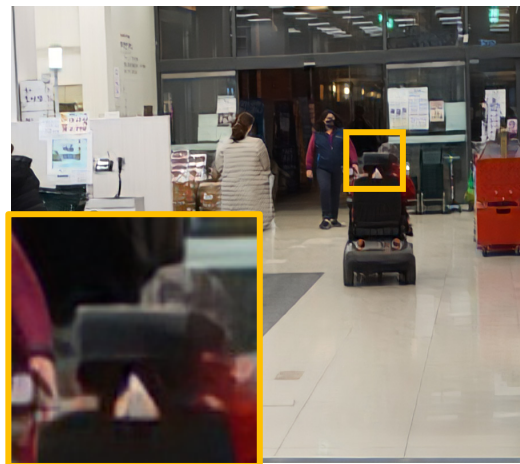

(g) DeblurGAN-v2 [8]  
RealBlur-J

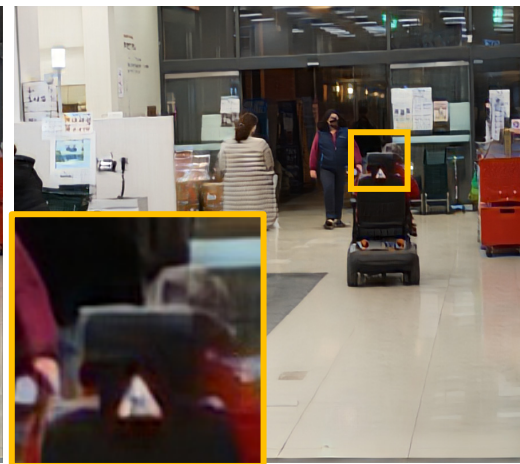

(h) DeblurGAN-v2 [8]  
RealBlur-J+GoPro+BSD-B

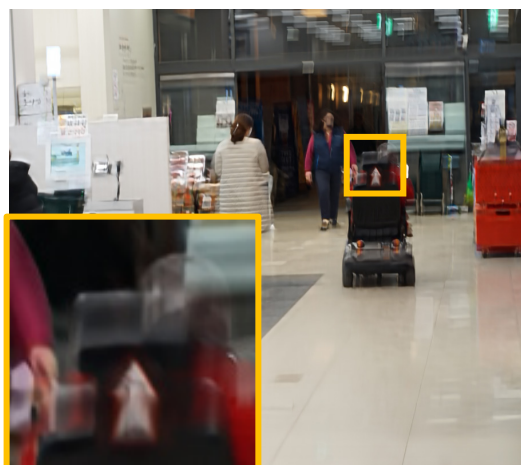

(i) SRN-DeblurNet [9]

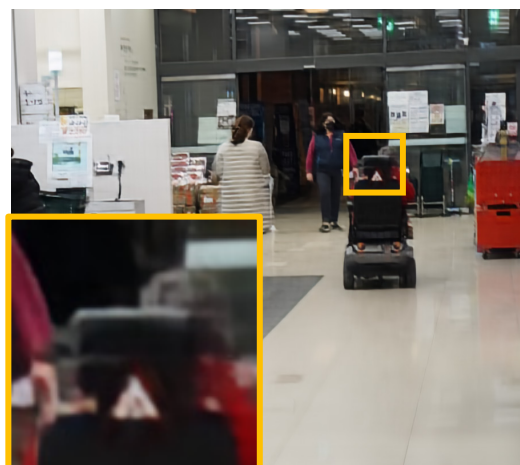

(j) SRN-DeblurNet [9]  
RealBlur-J

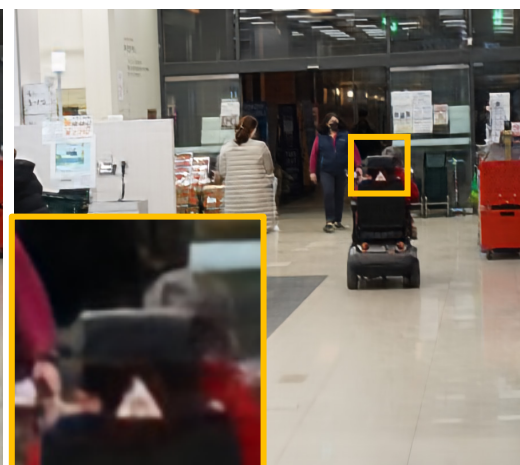

(k) SRN-DeblurNet [9]  
RealBlur-J+GoPro+BSD-B

# Additional examples of dynamic scenes (5)

Black: deep learning-based methods. Blue\*: deep learning-based methods trained with our dataset.

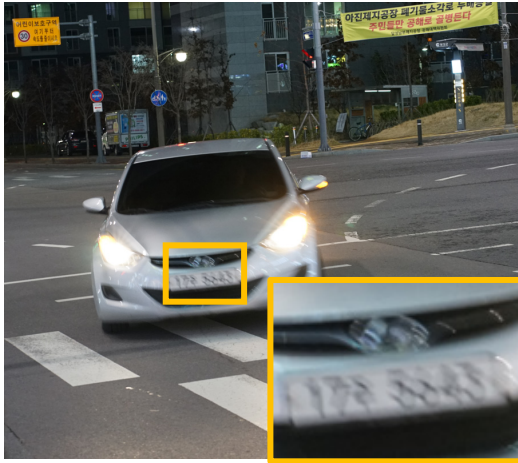

(a) Blurred image

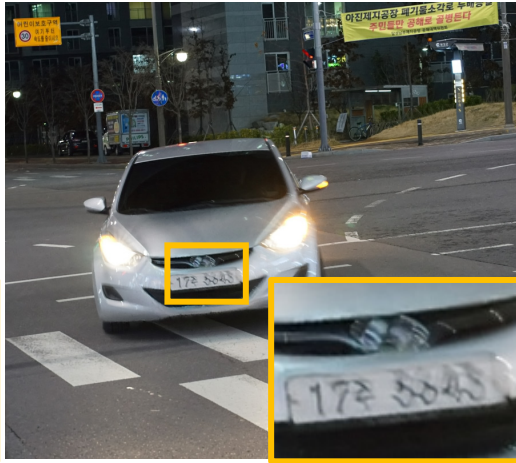

(b) Nah et al. [4]

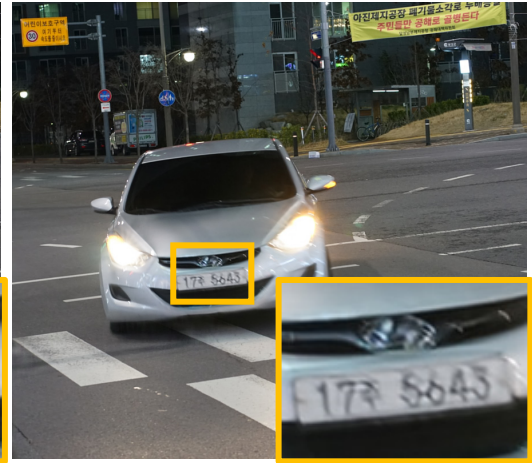

(c) Zhang et al. [5]

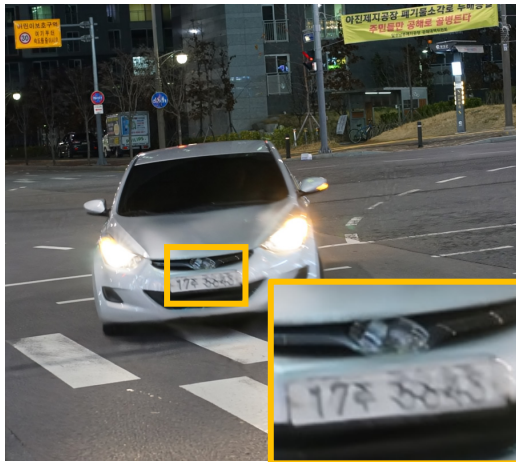

(d) Zhang et al. [6]

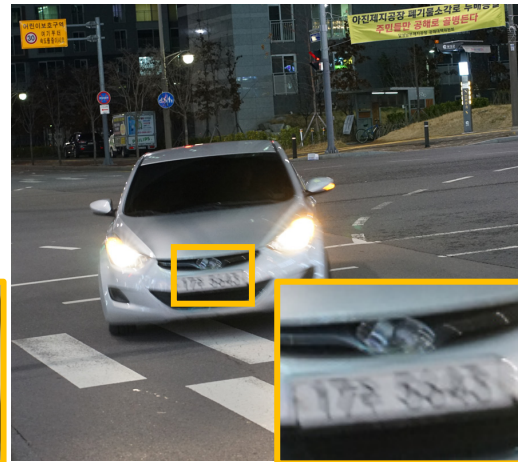

(e) DeblurGAN [7]

# Additional examples of dynamic scenes (5)

Black: deep learning-based methods. Blue\*: deep learning-based methods trained with our dataset.

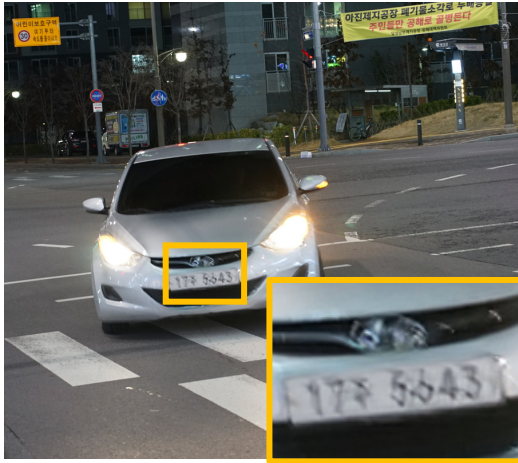

(f) DeblurGAN-v2 [8]

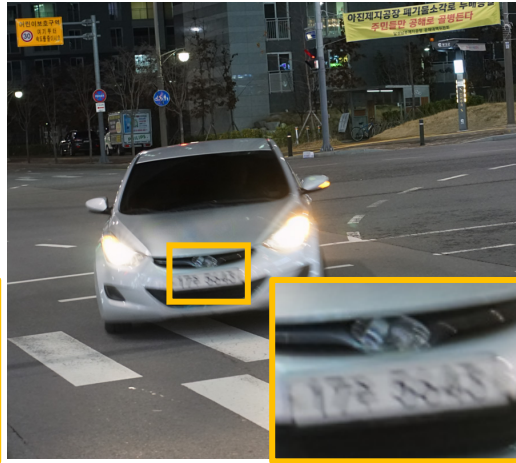

(g) DeblurGAN-v2 [8]  
RealBlur-J

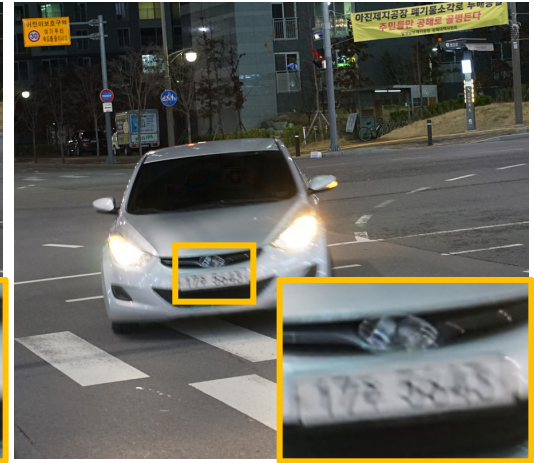

(h) DeblurGAN-v2 [8]  
RealBlur-J+GoPro+BSD-B

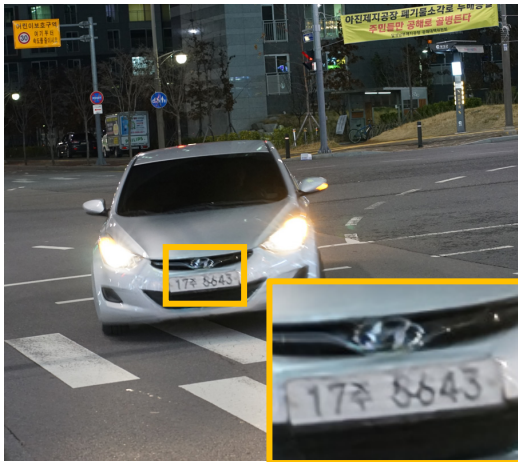

(i) SRN-DeblurNet [9]

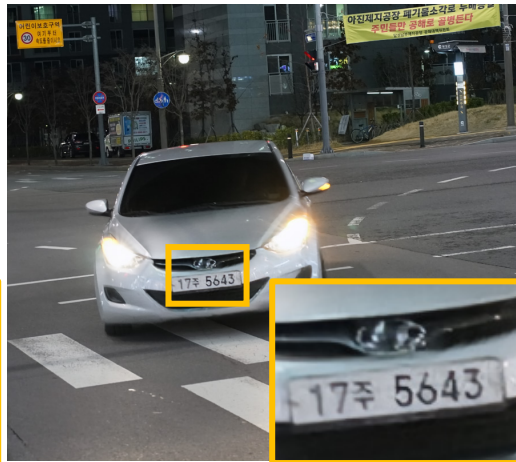

(j) SRN-DeblurNet [9]  
RealBlur-J

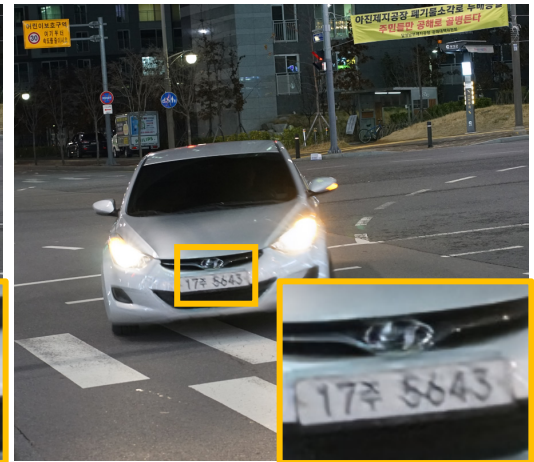

(k) SRN-DeblurNet [9]  
RealBlur-J+GoPro+BSD-B

# Additional examples of RealBlur-TeleJ (1)

Black: deep learning-based methods. Blue\*: deep learning-based methods trained with our dataset.

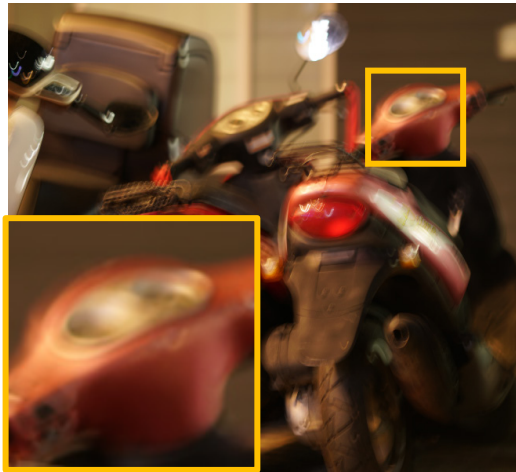

(a) Blurred image  
PSNR/SSIM

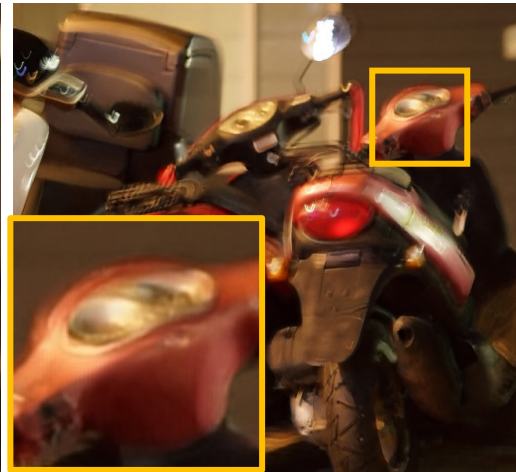

(b) Nah et al. [4]  
23.22/0.7269

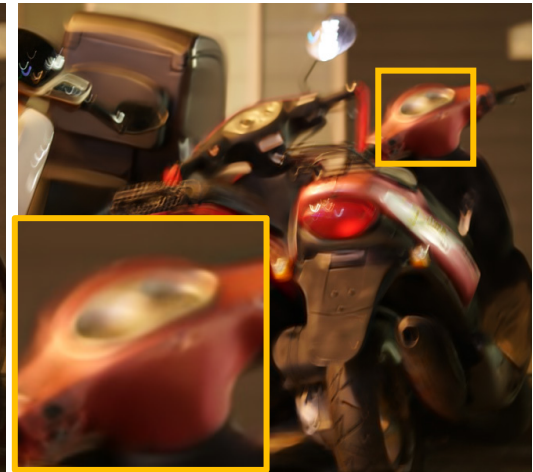

(c) Zhang et al. [5]  
23.41/0.7426

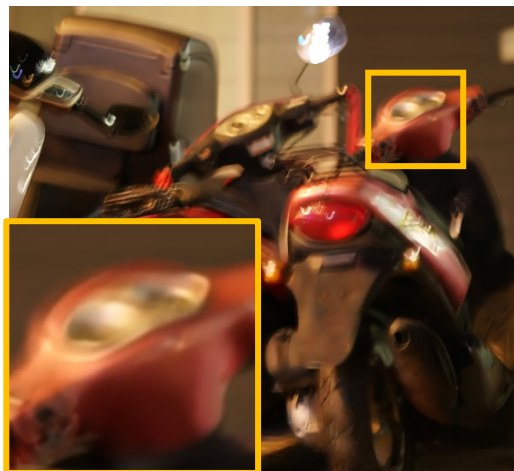

(d) Zhang et al. [6]  
23.00/0.7236

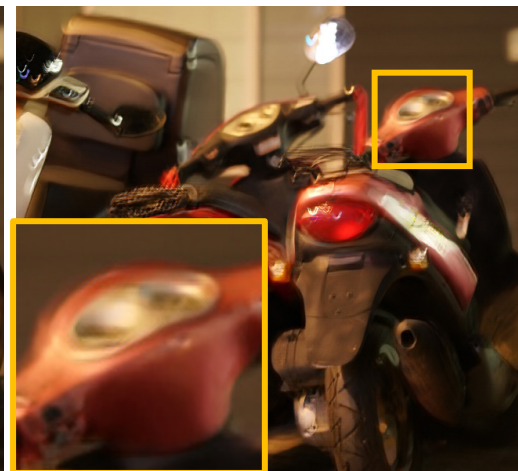

(e) DeblurGAN [7]  
23.43/0.7387

# Additional examples of RealBlur-TeleJ (1)

Black: deep learning-based methods. Blue\*: deep learning-based methods trained with our dataset.

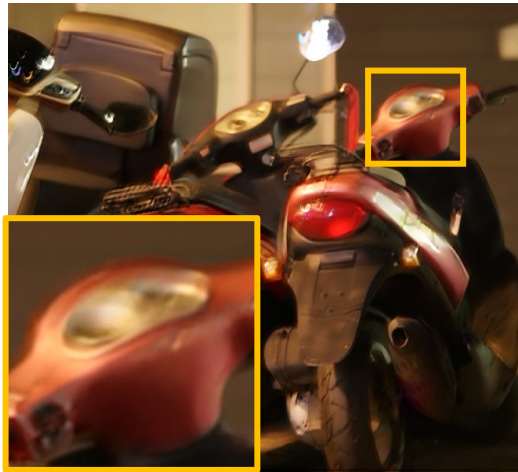

(f) DeblurGAN-v2 [8]  
24.67/0.7980

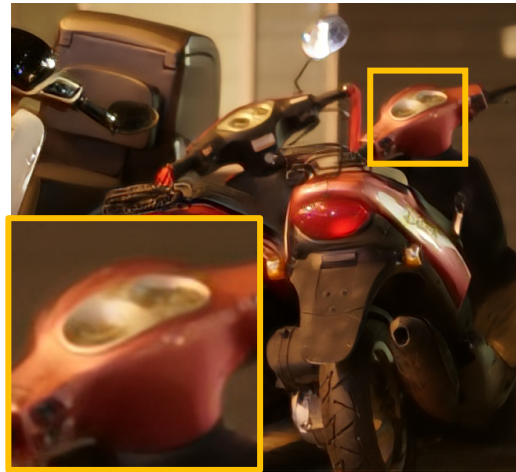

(g) DeblurGAN-v2\* [8]  
25.81/0.8031

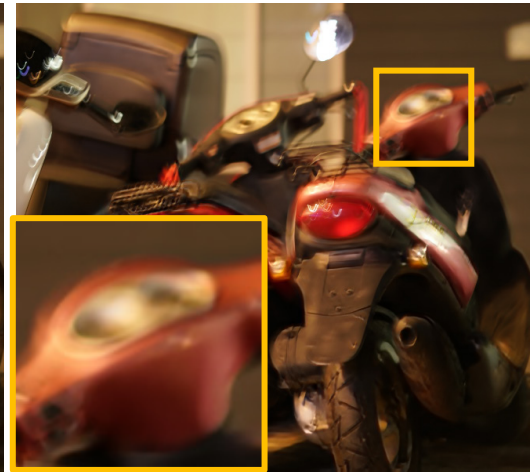

(h) SRN-DeblurNet [9]  
23.62/0.7532

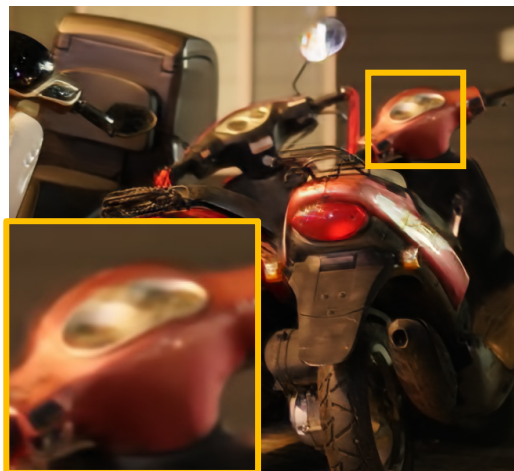

(i) SRN-DeblurNet\* [9]  
26.80/0.8763

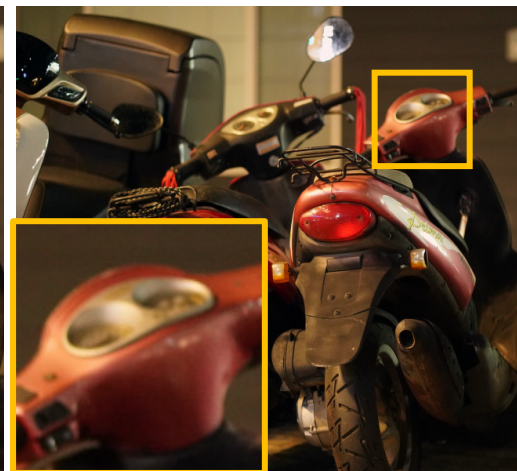

(j) Ground truth

# Additional examples of RealBlur-TeleJ (2)

Black: deep learning-based methods. Blue\*: deep learning-based methods trained with our dataset.

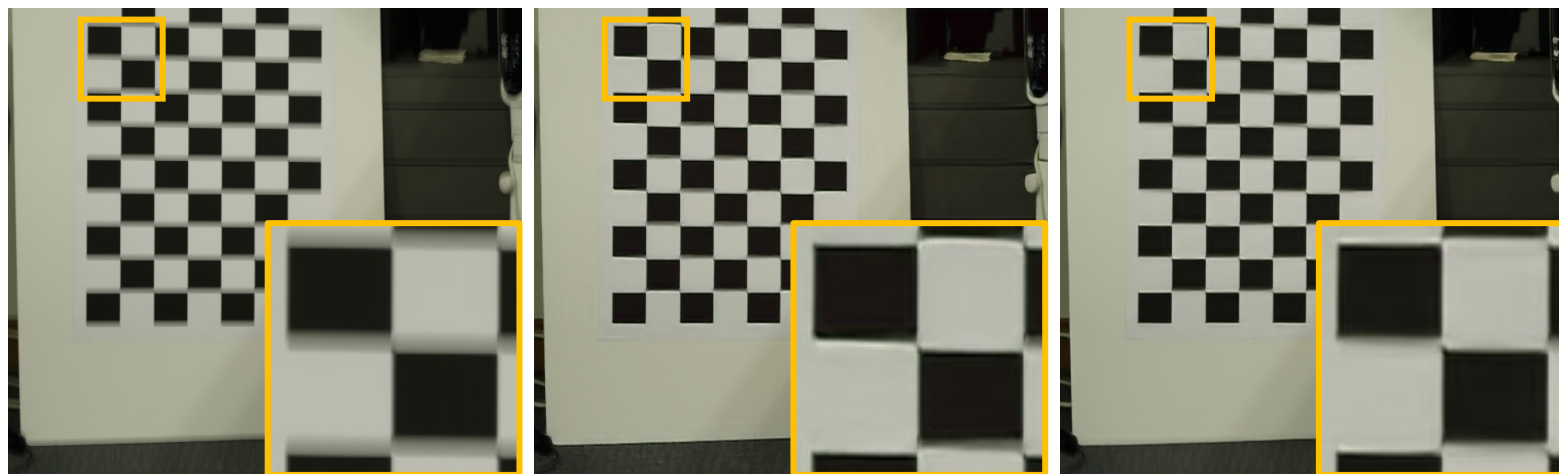

(a) Blurred image  
PSNR/SSIM

(b) Nah et al. [4]  
24.84/0.8642

(c) Zhang et al. [5]  
25.10/0.8911

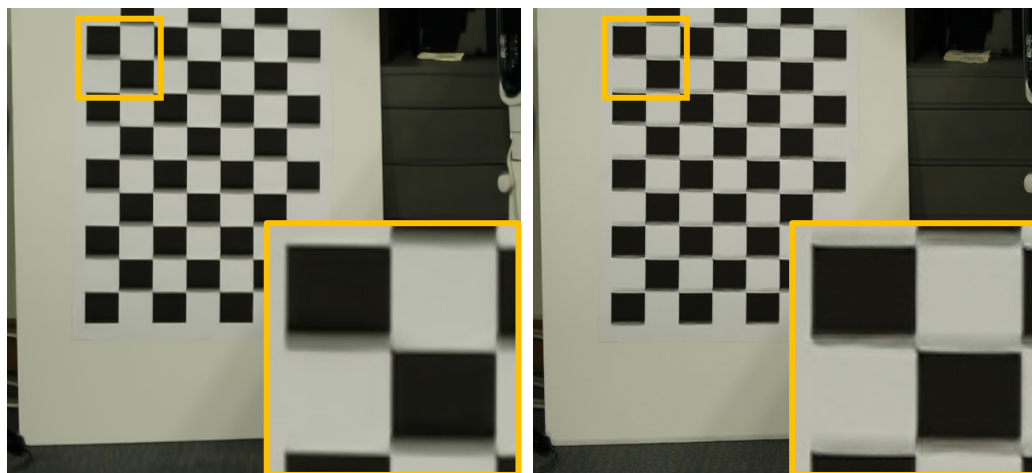

(d) Zhang et al. [6]  
25.93/0.8991

(e) DeblurGAN [7]  
24.94/0.8713

# Additional examples of RealBlur-TeleJ (2)

Black: deep learning-based methods. Blue\*: deep learning-based methods trained with our dataset.

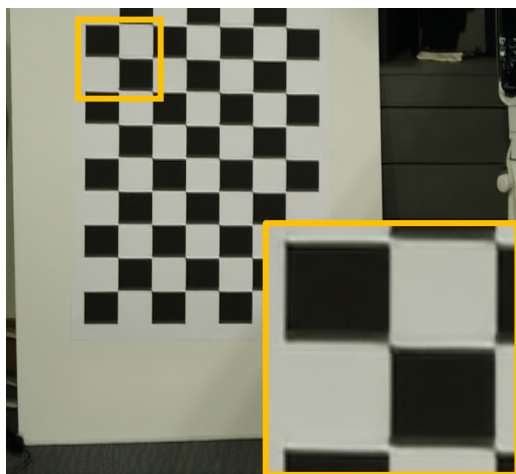

(f) DeblurGAN-v2 [8]  
27.17/0.9104

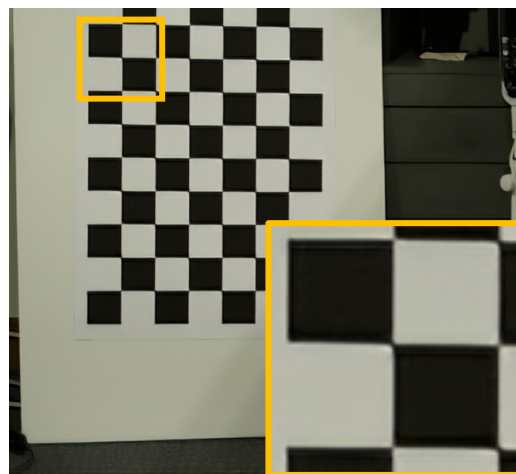

(g) DeblurGAN-v2\* [8]  
31.22/0.9127

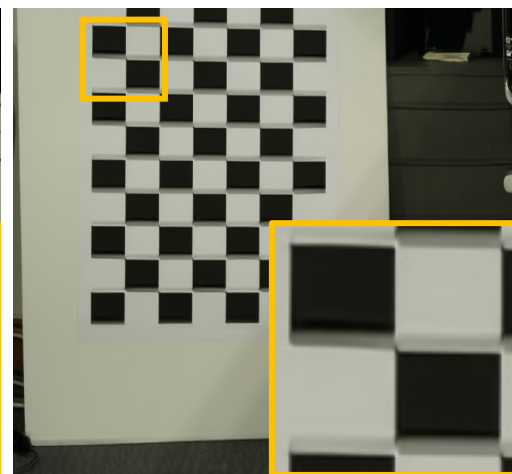

(h) SRN-DeblurNet [9]  
25.19/0.8897

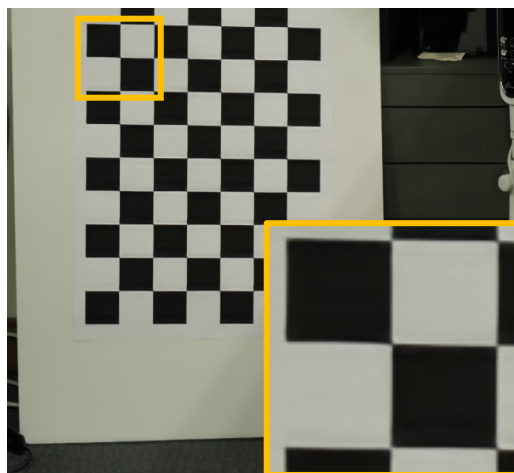

(i) SRN-DeblurNet\* [9]  
32.75/0.9493

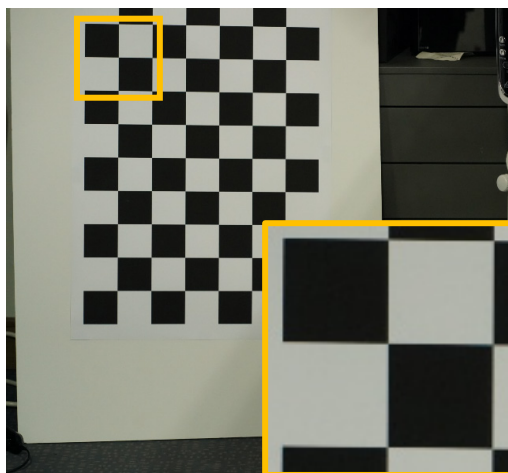

(j) Ground truth

# Additional examples of RealBlur-TeleJ (3)

Black: deep learning-based methods. Blue\*: deep learning-based methods trained with our dataset.

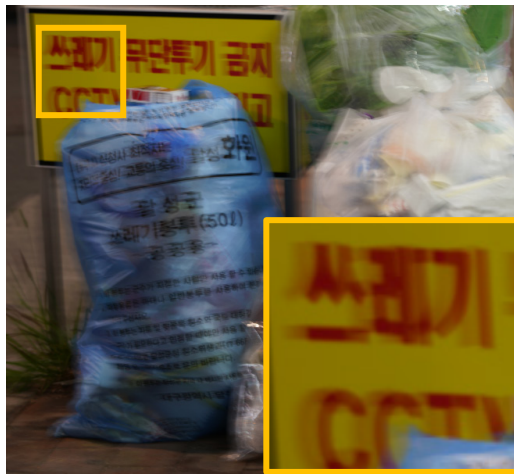

(a) Blurred image  
PSNR/SSIM

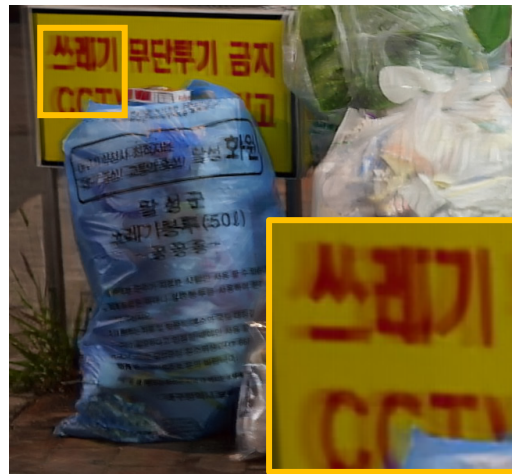

(b) Nah et al. [4]  
26.48/0.7737

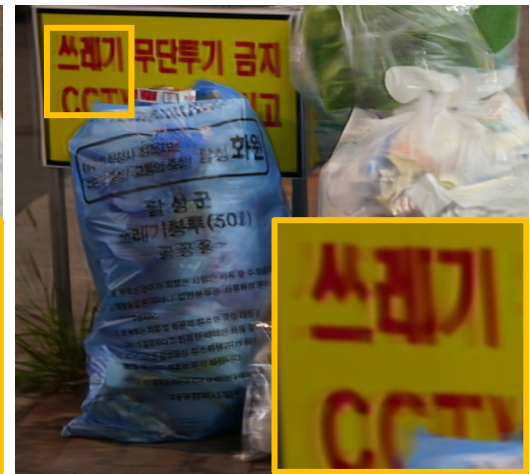

(c) Zhang et al. [5]  
26.71/0.7924

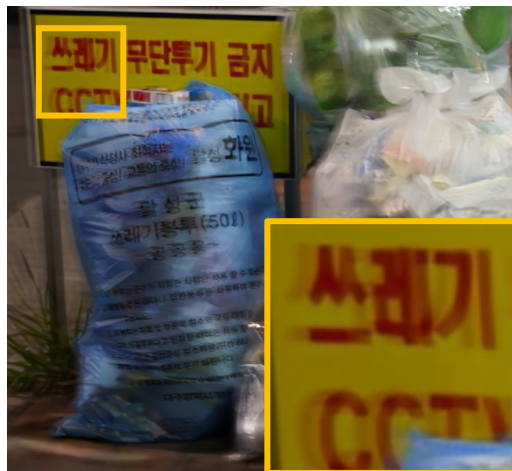

(d) Zhang et al. [6]  
25.34/0.7822

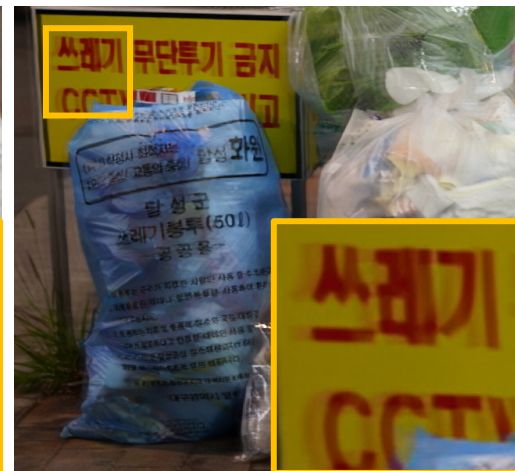

(e) DeblurGAN [7]  
27.12/0.8067

# Additional examples of RealBlur-TeleJ (3)

Black: deep learning-based methods. Blue\*: deep learning-based methods trained with our dataset.

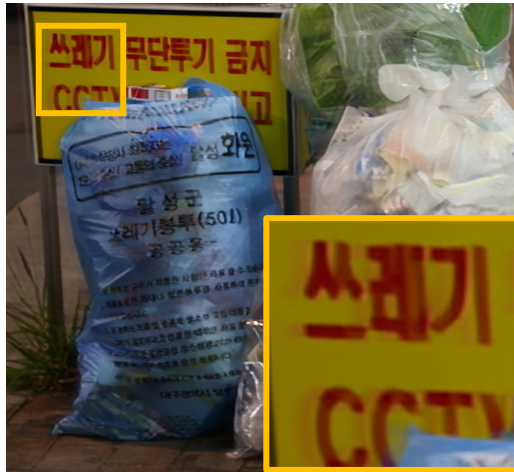

(f) DeblurGAN-v2 [8]  
27.91/0.8414

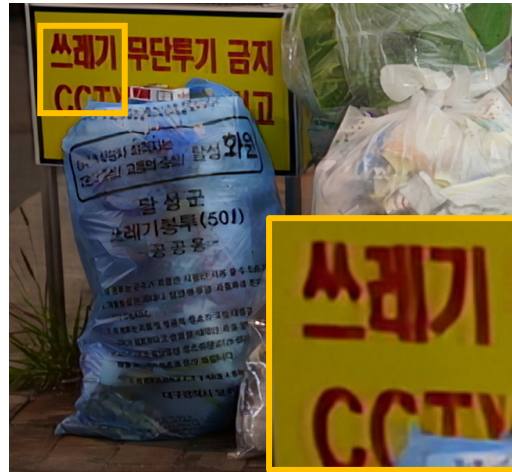

(g) DeblurGAN-v2\* [8]  
27.55/0.8302

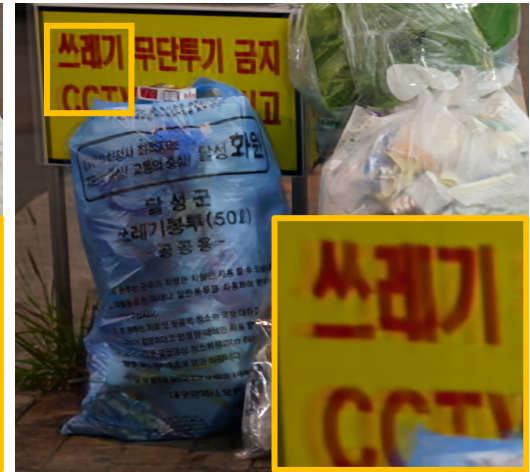

(h) SRN-DeblurNet [9]  
27.62/0.8442

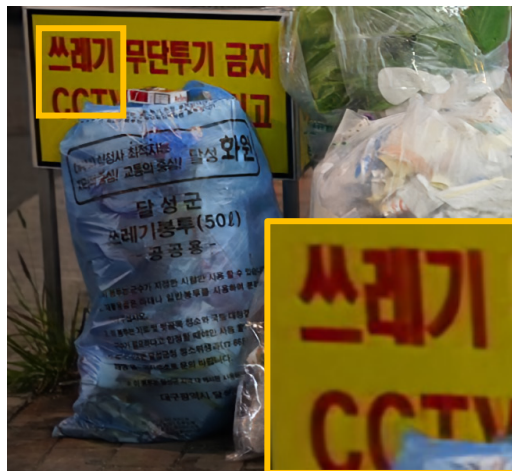

(i) SRN-DeblurNet\* [9]  
29.20/0.8943

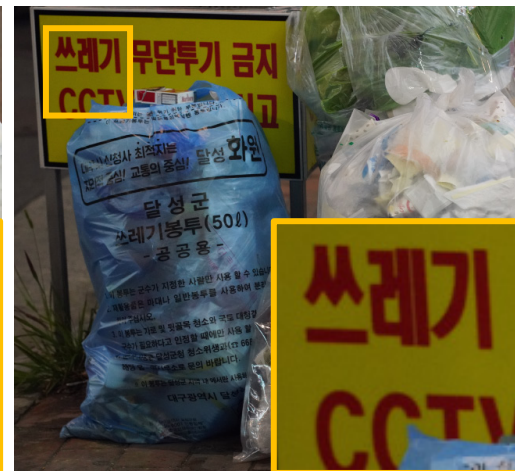

(j) Ground truth

# Additional examples of RealBlur-TeleR (1)

Black: deep learning-based methods. Blue\*: deep learning-based methods trained with our dataset.

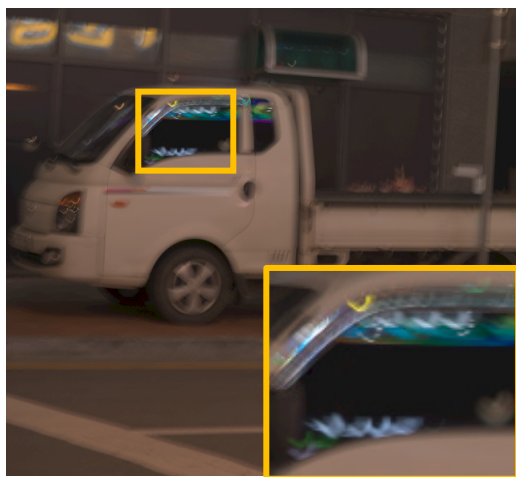

(a) Blurred image  
PSNR/SSIM

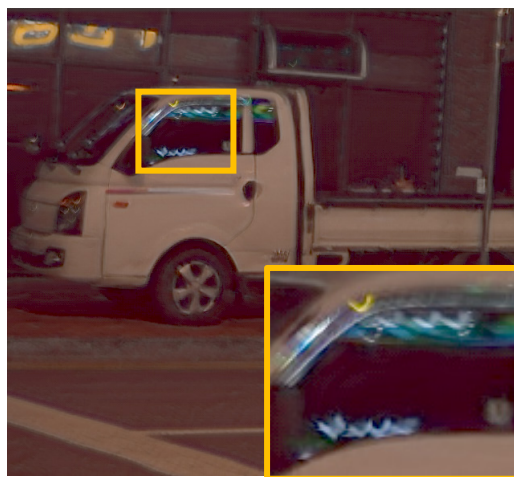

(b) Nah et al. [4]  
31.88/0.8435

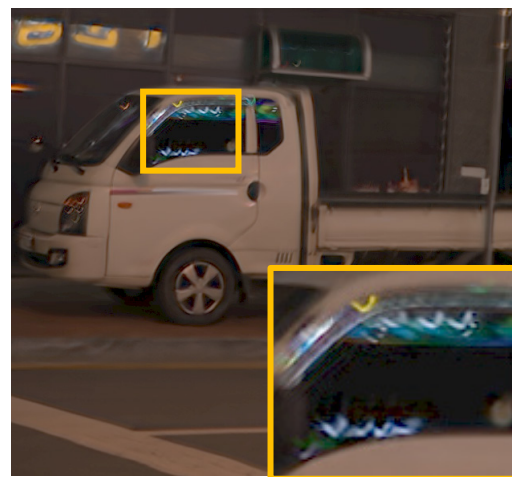

(c) Zhang et al. [5]  
34.50/0.9425

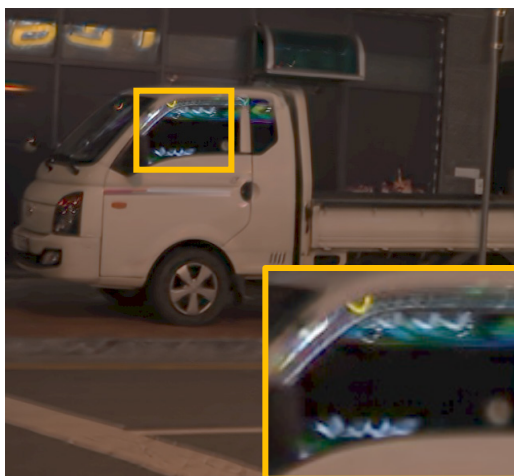

(d) Zhang et al. [6]  
34.71/0.9497

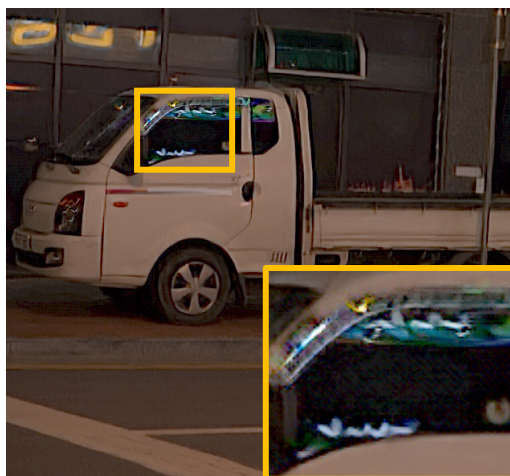

(e) DeblurGAN [7]  
33.66/0.9186

# Additional examples of RealBlur-TeleR (1)

Black: deep learning-based methods. Blue\*: deep learning-based methods trained with our dataset.

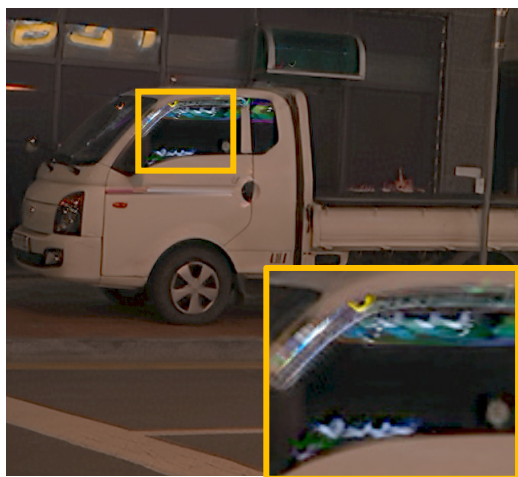

(f) DeblurGAN-v2 [8]  
34.49/0.9419

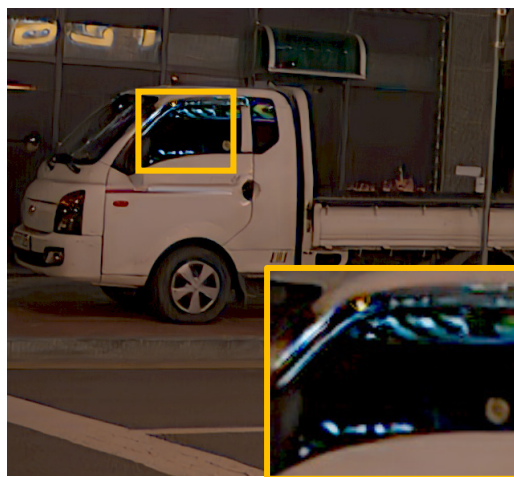

(g) DeblurGAN-v2\* [8]  
34.66/0.9160

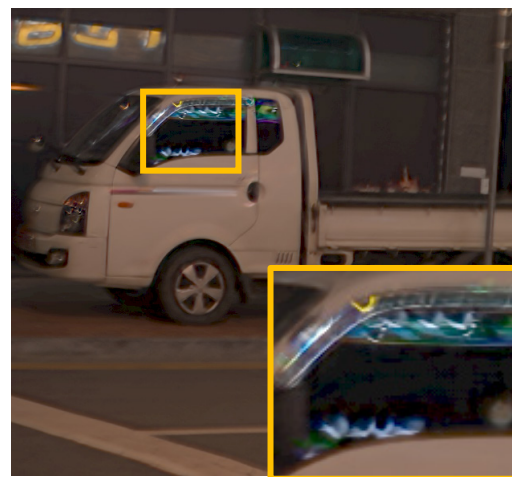

(h) SRN-DeblurNet [9]  
34.72/0.9483

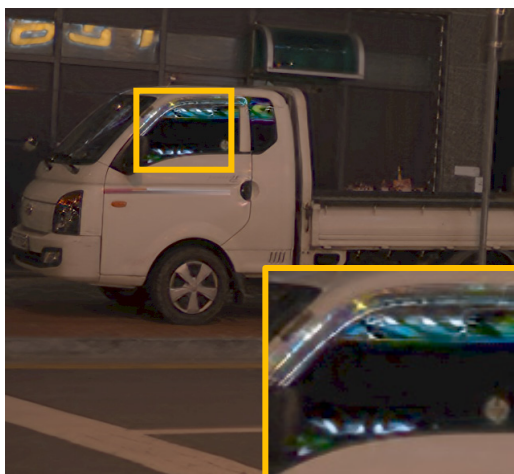

(i) SRN-DeblurNet\* [9]  
37.39/0.9681

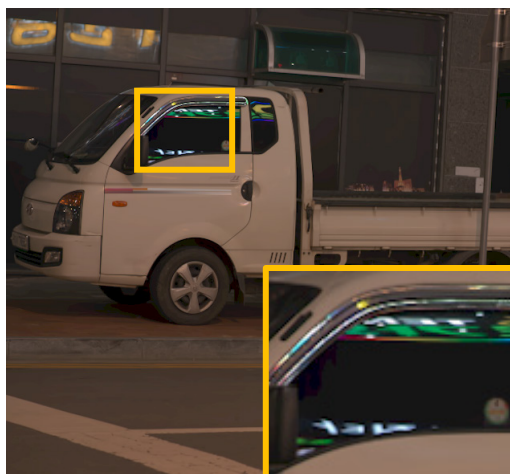

(j) Ground truth

# Additional examples of RealBlur-TeleR (2)

Black: deep learning-based methods. Blue\*: deep learning-based methods trained with our dataset.

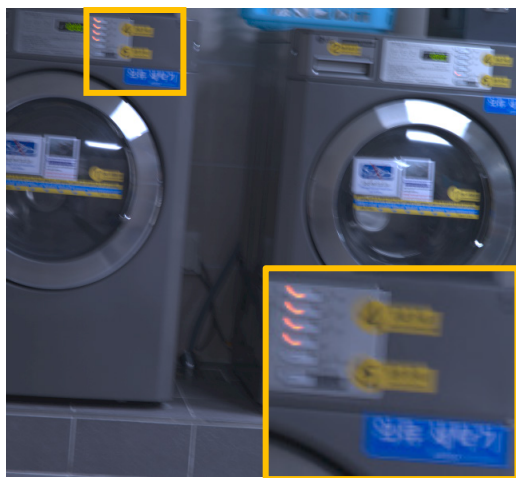

(a) Blurred image  
PSNR/SSIM

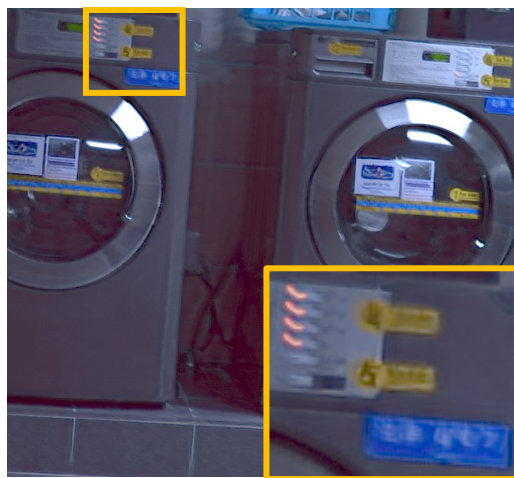

(b) Nah et al. [4]  
28.69/0.8701

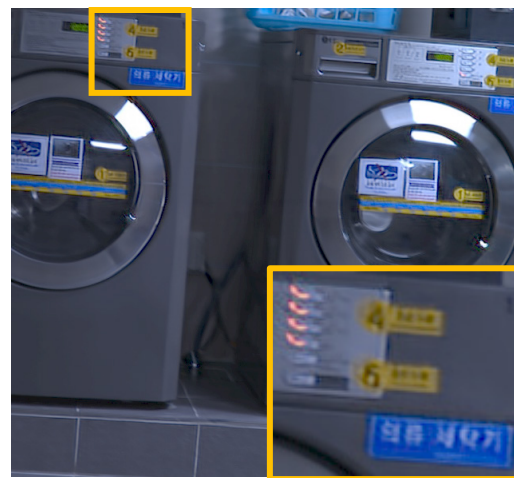

(c) Zhang et al. [5]  
29.40/0.9219

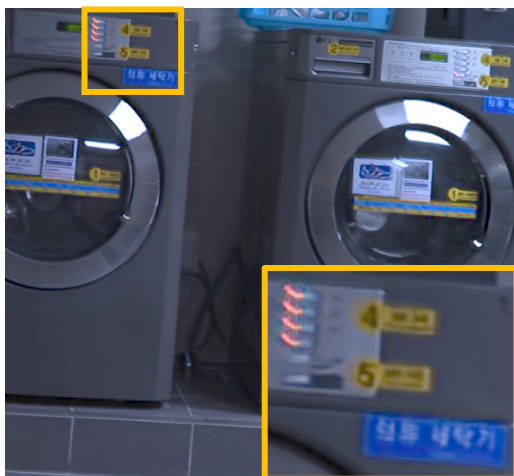

(d) Zhang et al. [6]  
29.10/0.9183

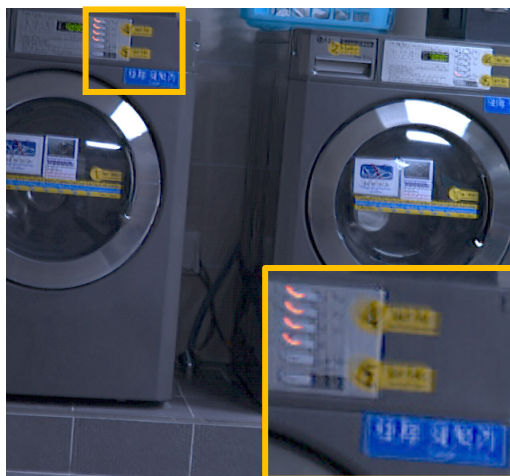

(e) DeblurGAN [7]  
29.04/0.9132

# Additional examples of RealBlur-TeleR (2)

Black: deep learning-based methods. Blue\*: deep learning-based methods trained with our dataset.

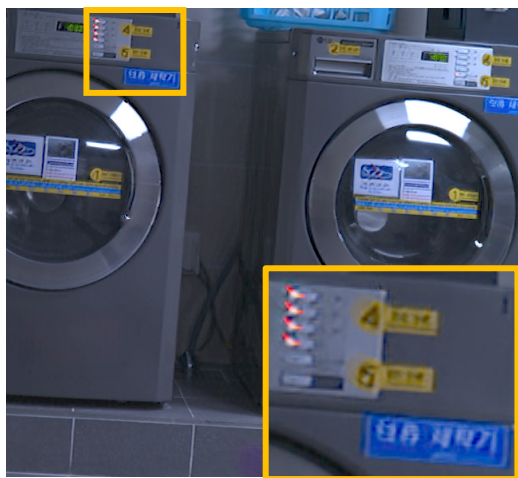

(f) DeblurGAN-v2 [8]  
29.71/0.9271

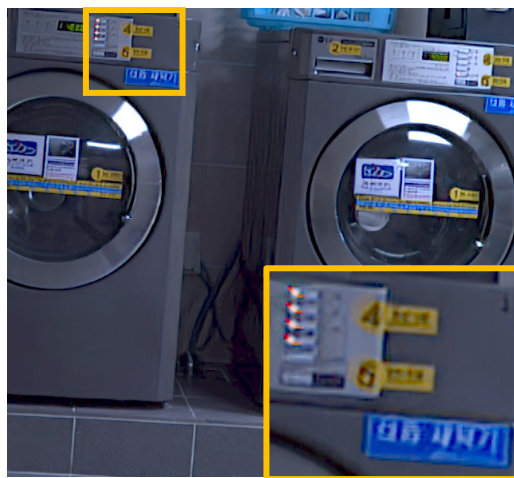

(g) DeblurGAN-v2\* [8]  
30.50/0.9284

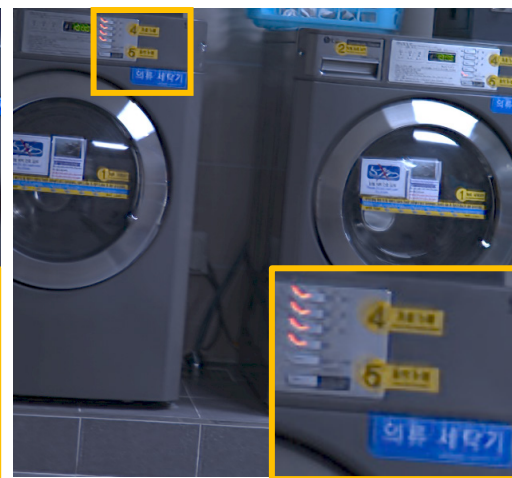

(h) SRN-DeblurNet [9]  
29.13/0.9238

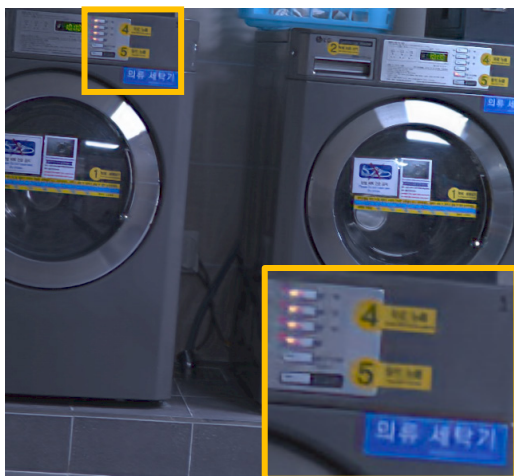

(i) SRN-DeblurNet\* [9]  
33.03/0.9572

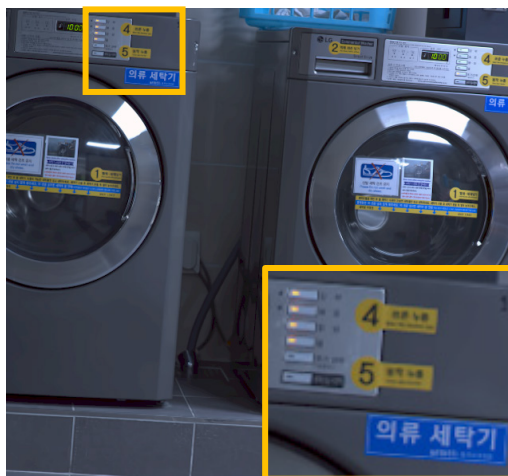

(j) Ground truth

# Additional examples of RealBlur-TeleR (3)

Black: deep learning-based methods. Blue\*: deep learning-based methods trained with our dataset.

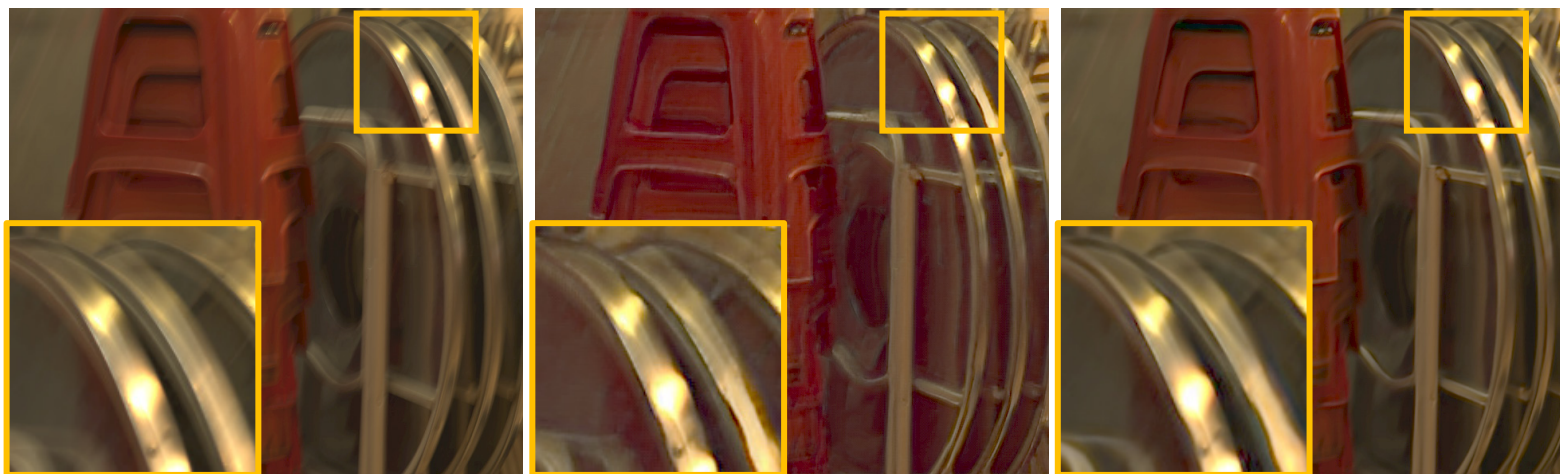

(a) Blurred image  
PSNR/SSIM

(b) Nah et al. [4]  
27.86/0.8561

(c) Zhang et al. [5]  
28.24/0.9149

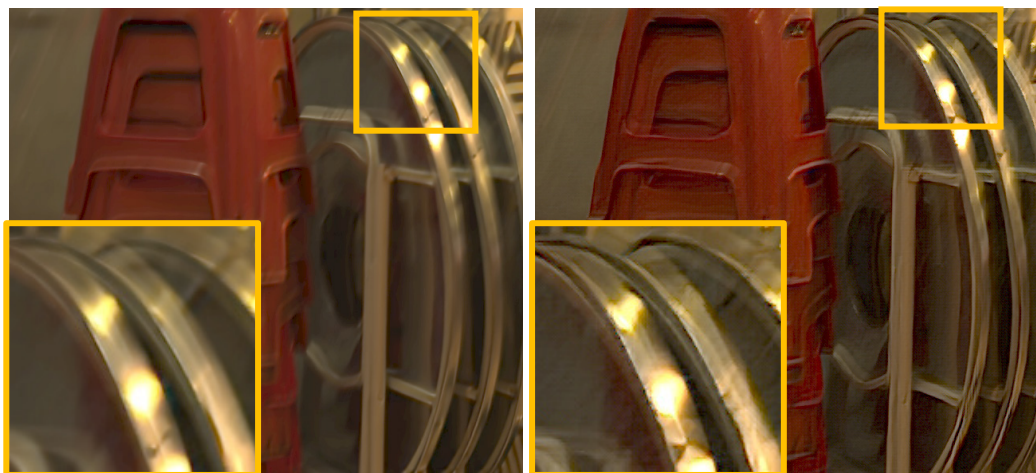

(d) Zhang et al. [6]  
28.03/0.9133

(e) DeblurGAN [7]  
27.35/0.8491

# Additional examples of RealBlur-TeleR (3)

Black: deep learning-based methods. Blue\*: deep learning-based methods trained with our dataset.

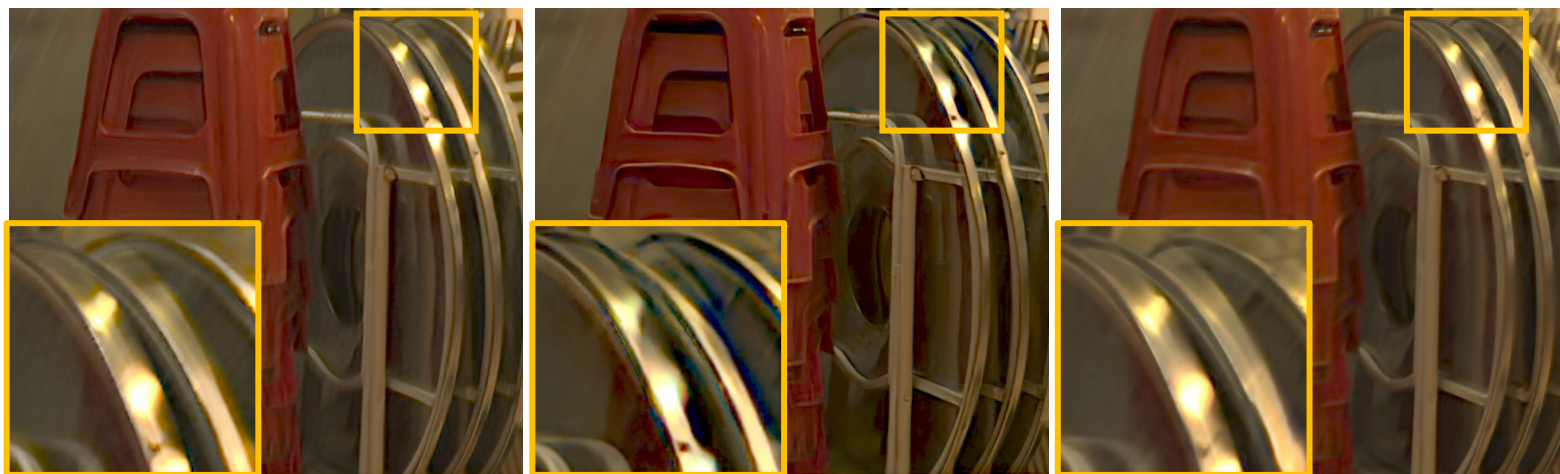

(f) DeblurGAN-v2 [8]  
28.71/0.9084

(g) DeblurGAN-v2\* [8]  
30.96/0.8750

(h) SRN-DeblurNet [9]  
28.23/0.9159

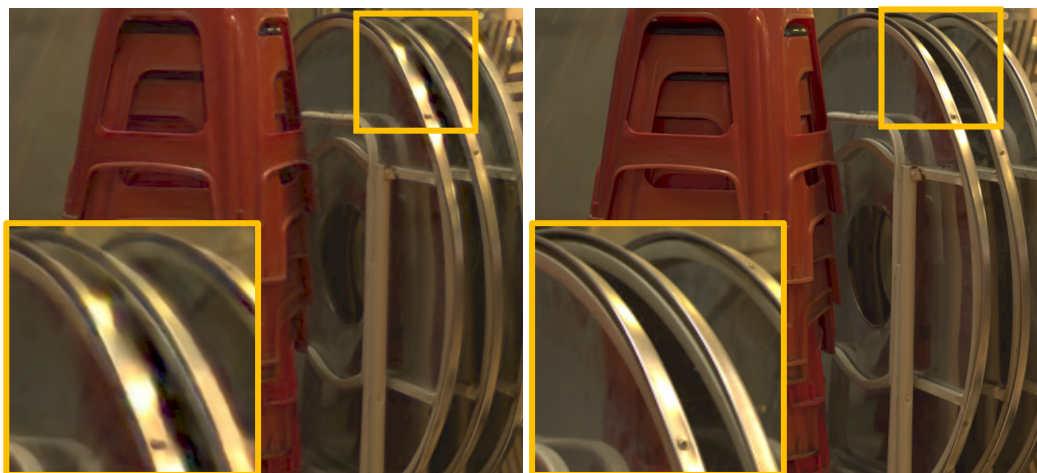

(i) SRN-DeblurNet\* [9]  
32.42/0.9508

(j) Ground truth

# Real-world blurred image dataset of Lai et al. [10] (1)

Black: deep learning-based methods. Blue\*: deep learning-based methods trained with our dataset.

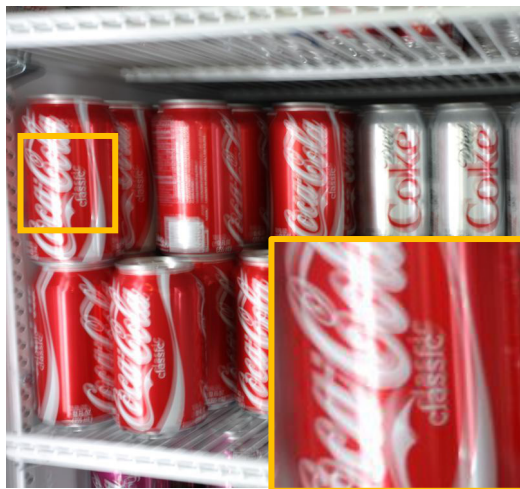

(a) Blurred image

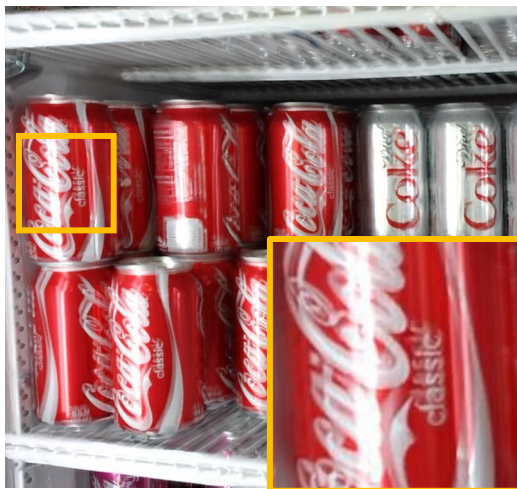

(b) Nah et al. [4]

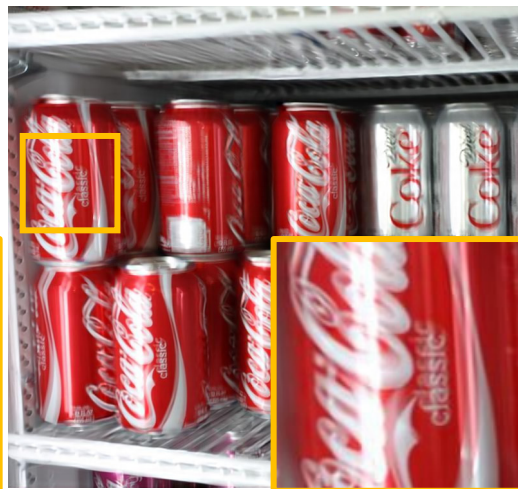

(c) Zhang et al. [5]

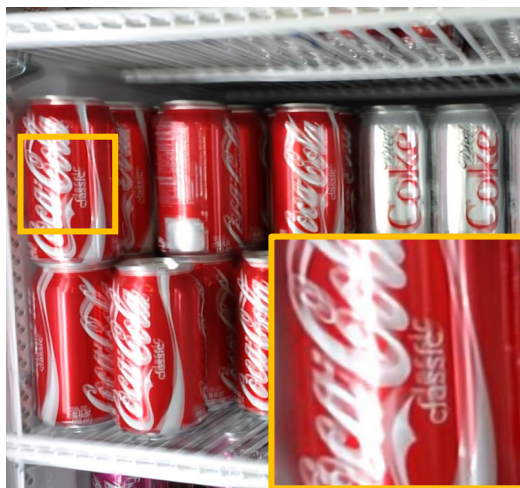

(d) Zhang et al. [6]

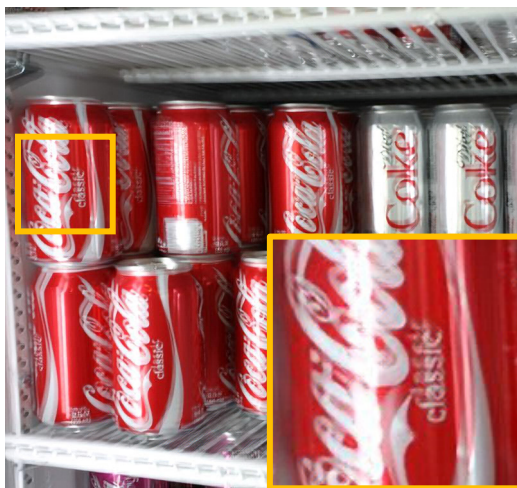

(e) DeblurGAN [7]

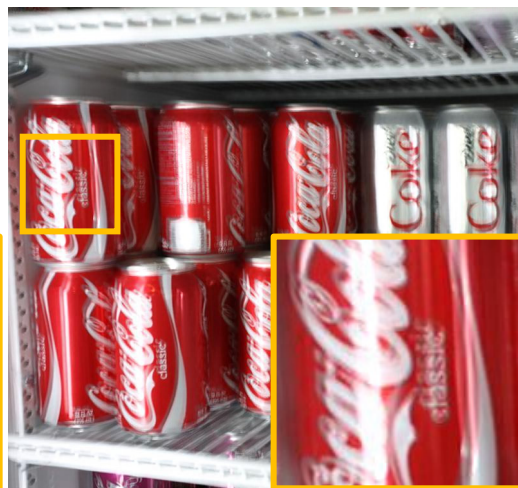

(f) DeblurGAN-v2 [8]

# Real-world blurred image dataset of Lai et al. [10] (1)

Black: deep learning-based methods. Blue\*: deep learning-based methods trained with our dataset.

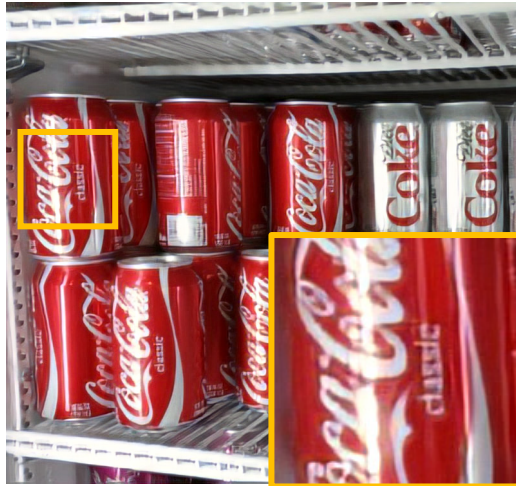

(g) DeblurGAN-v2\* [8]

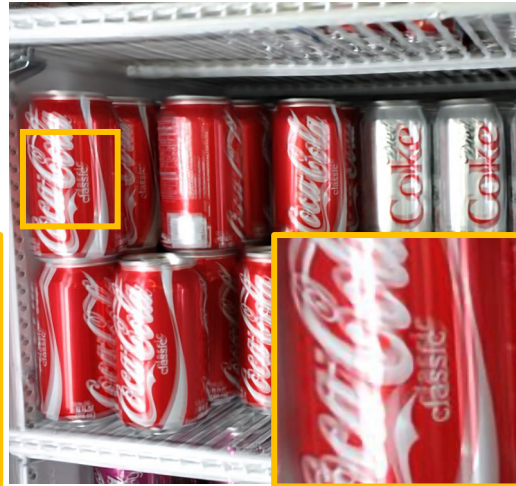

(h) SRN-DeblurNet [9]

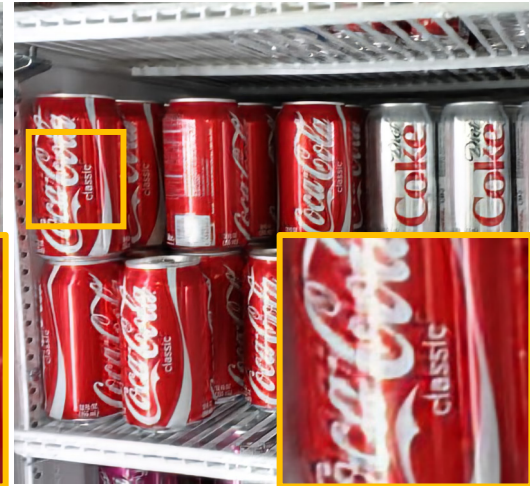

(i) SRN-DeblurNet\* [9]

# Real-world blurred image dataset of Lai et al. [10] (2)

Black: deep learning-based methods. Blue\*: deep learning-based methods trained with our dataset.

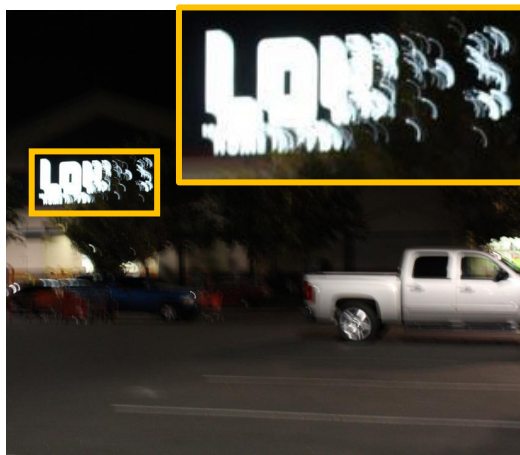

(a) Blurred image

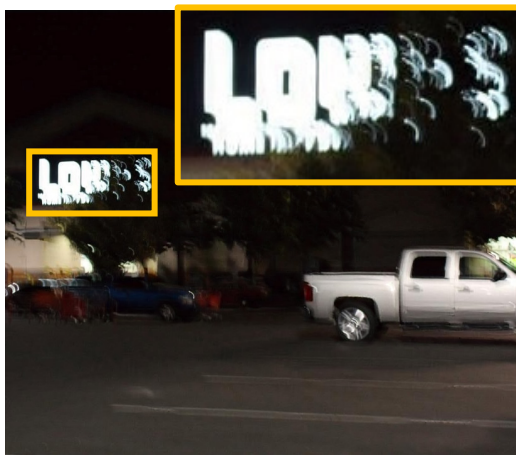

(b) Nah et al. [4]

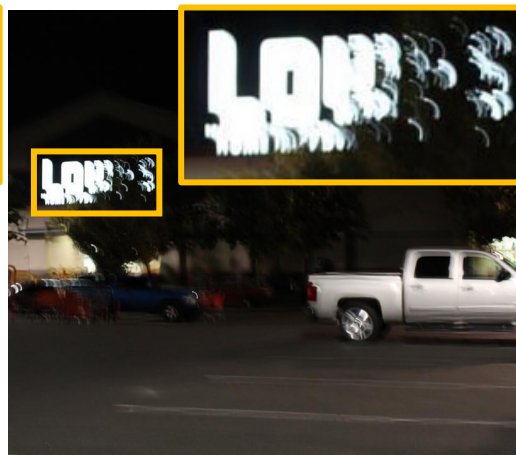

(c) Zhang et al. [5]

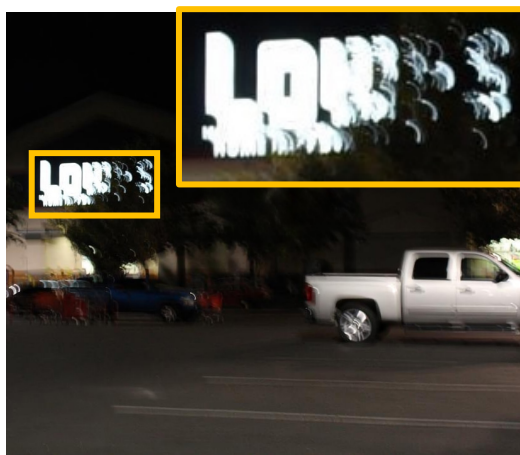

(d) Zhang et al. [6]

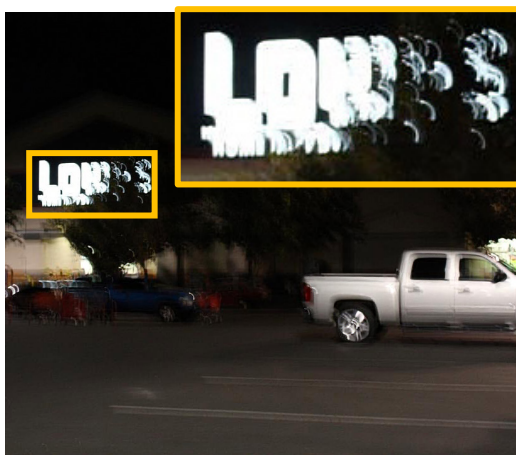

(e) DeblurGAN [7]

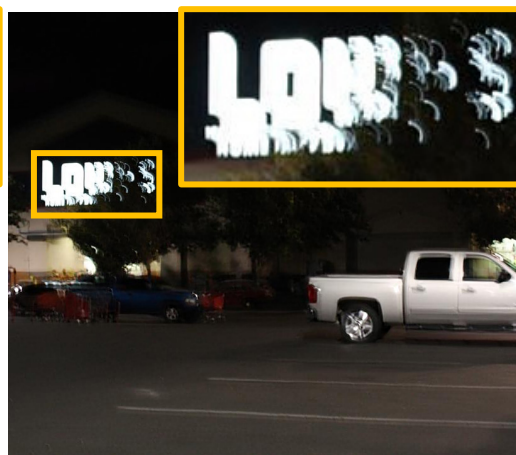

(f) DeblurGAN-v2 [8]

# Real-world blurred image dataset of Lai et al. [10] (2)

Black: deep learning-based methods. Blue\*: deep learning-based methods trained with our dataset.

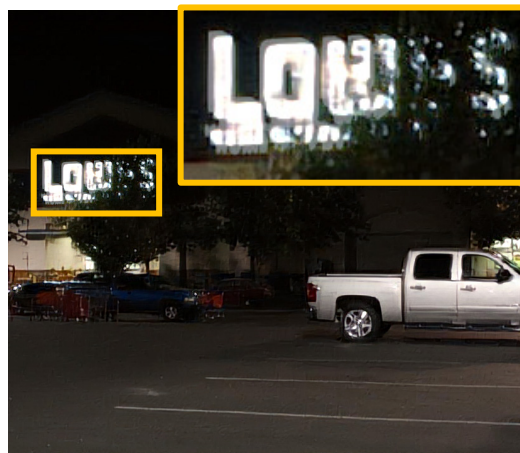

(g) DeblurGAN-v2\* [8]

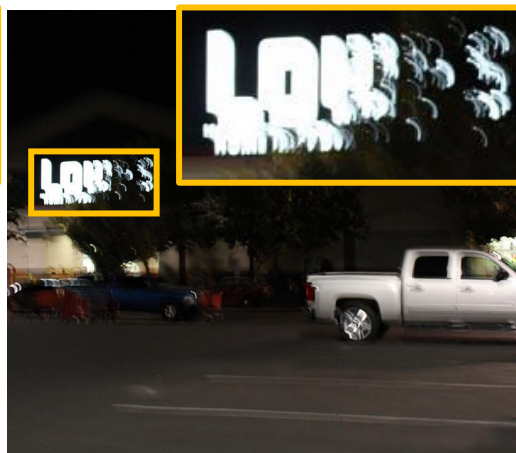

(h) SRN-DeblurNet [9]

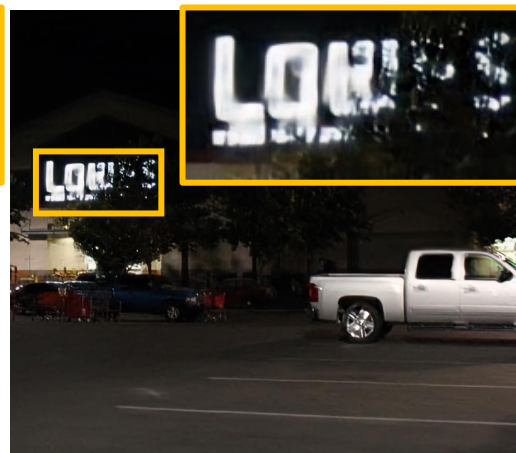

(i) SRN-DeblurNet\* [9]

# Real-world blurred image dataset of Lai et al. [10] (3)

Black: deep learning-based methods. Blue\*: deep learning-based methods trained with our dataset.

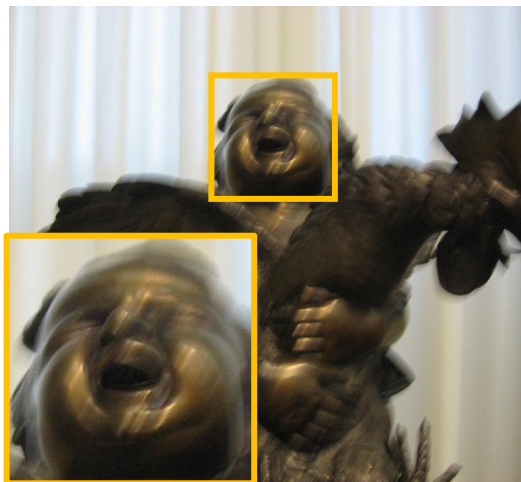

(a) Blurred image

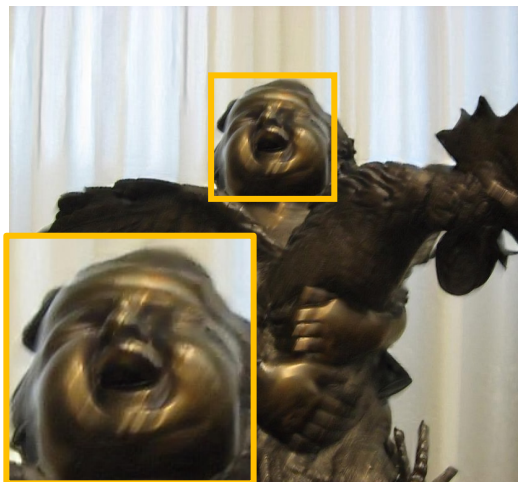

(b) Nah et al. [4]

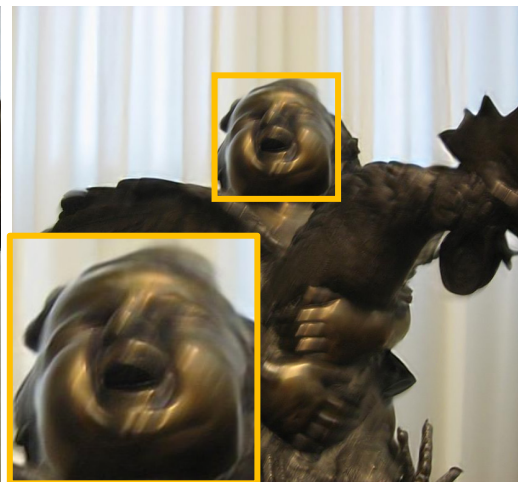

(c) Zhang et al. [5]

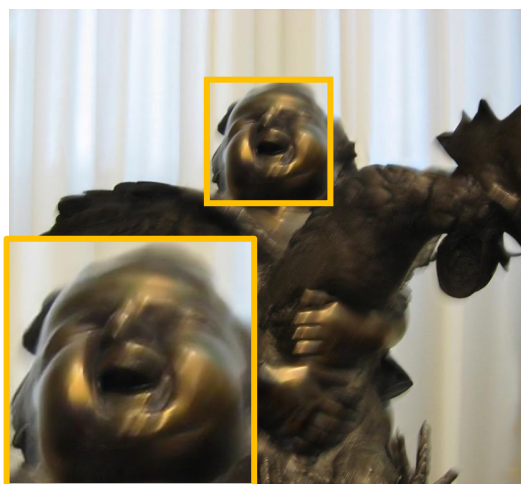

(d) Zhang et al. [6]

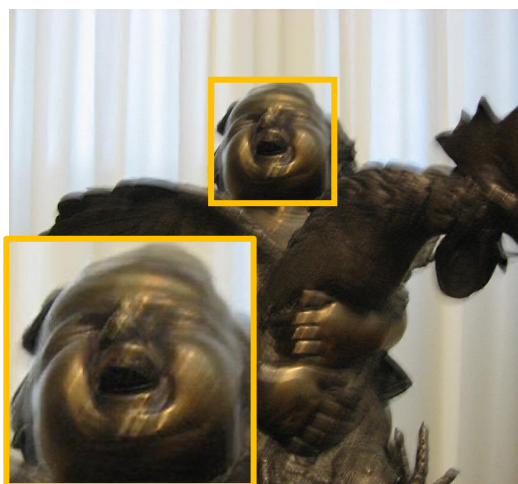

(e) DeblurGAN [7]

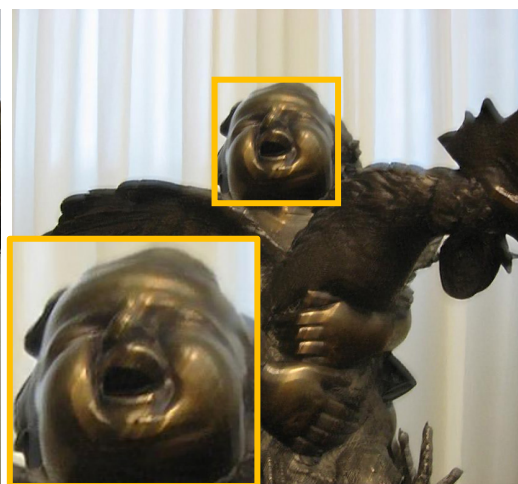

(f) DeblurGAN-v2 [8]

# Real-world blurred image dataset of Lai et al. [10] (3)

Black: deep learning-based methods. Blue\*: deep learning-based methods trained with our dataset.

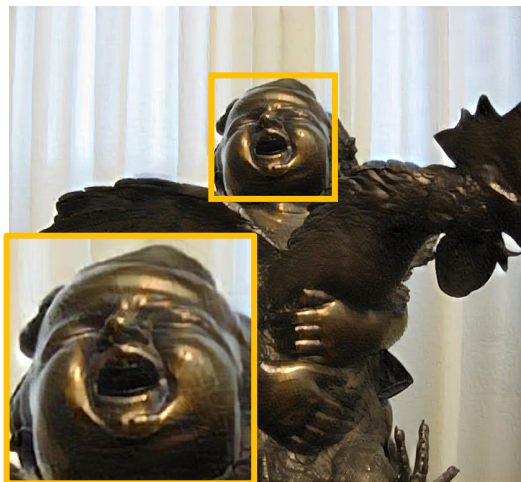

(g) DeblurGAN-v2\* [8]

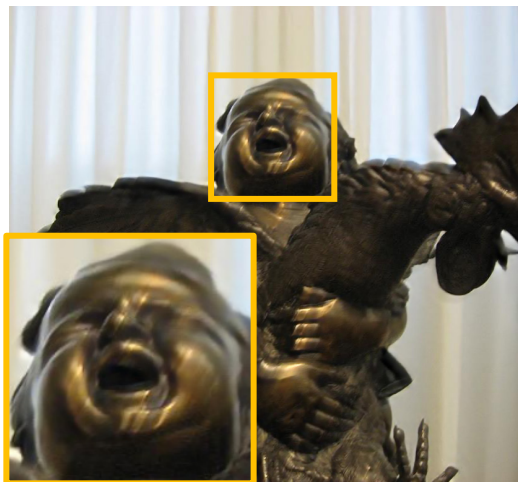

(h) SRN-DeblurNet [9]

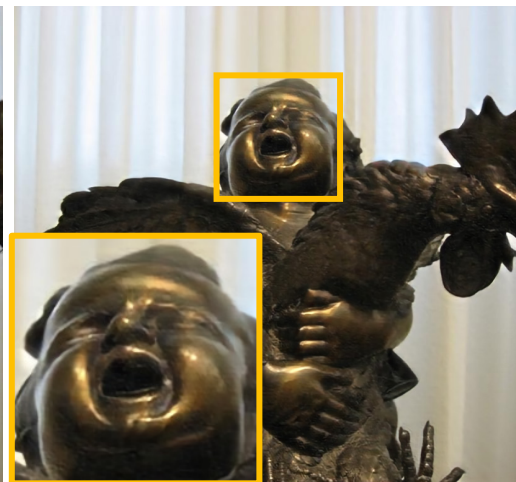

(i) SRN-DeblurNet\* [9]

# Real-world blurred image dataset of Lai et al. [10] (4)

Black: deep learning-based methods. Blue\*: deep learning-based methods trained with our dataset.

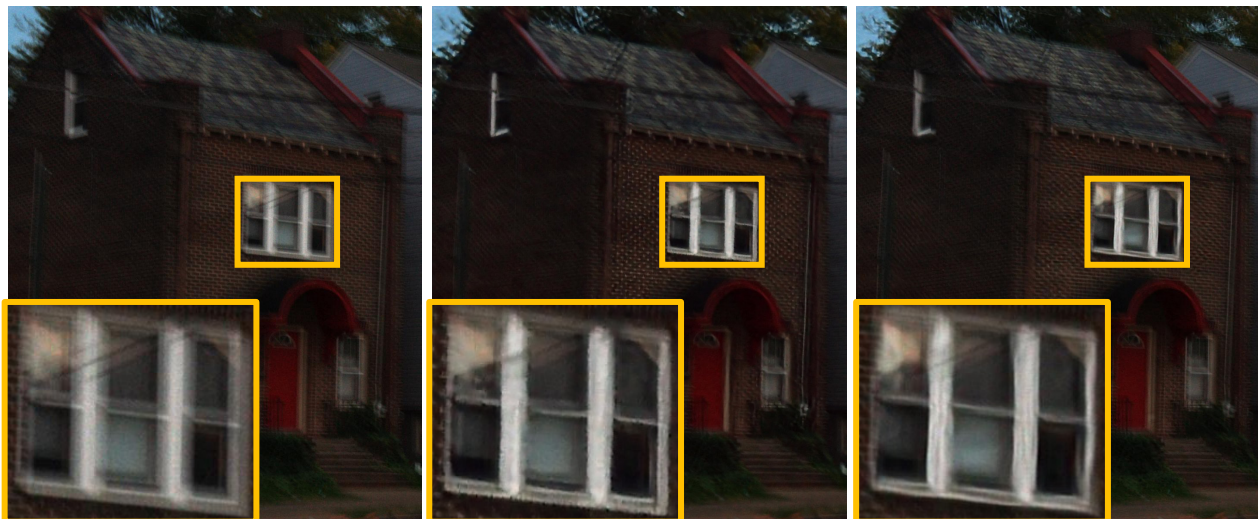

(a) Blurred image

(b) Nah et al. [4]

(c) Zhang et al. [5]

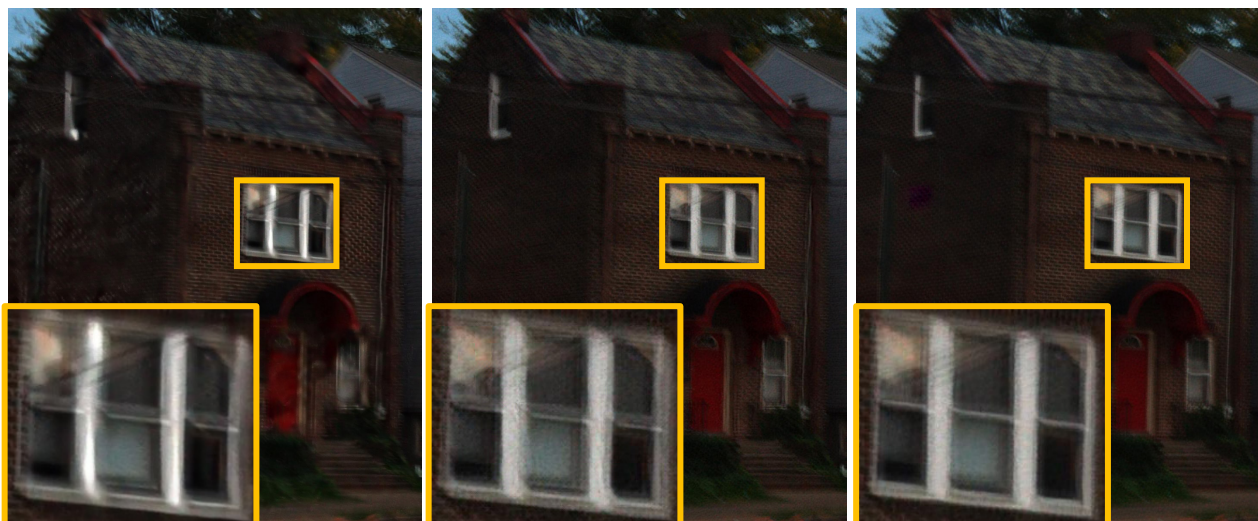

(d) Zhang et al. [6]

(e) DeblurGAN [7]

(f) DeblurGAN-v2 [8]

# Real-world blurred image dataset of Lai et al. [10] (4)

Black: deep learning-based methods. Blue\*: deep learning-based methods trained with our dataset.

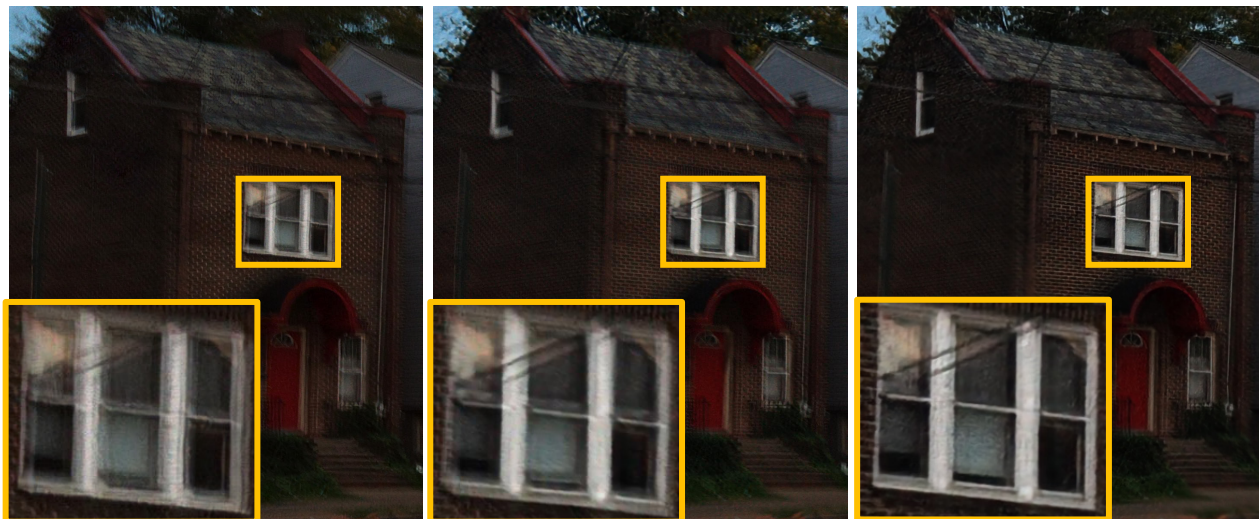

(g) DeblurGAN-v2\* [8]

(h) SRN-DeblurNet [9]

(i) SRN-DeblurNet\* [9]

# Real-world blurred image dataset of Lai et al. [10] (5)

Black: deep learning-based methods. Blue\*: deep learning-based methods trained with our dataset.

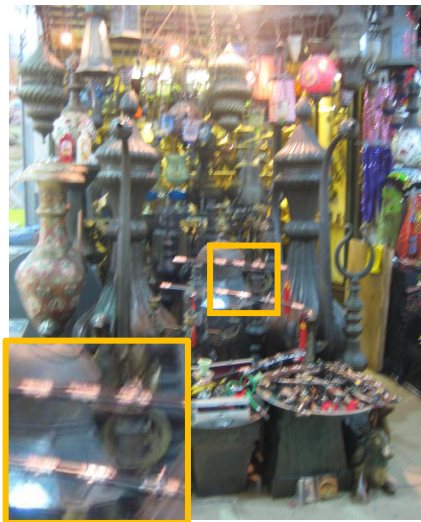

(a) Blurred image

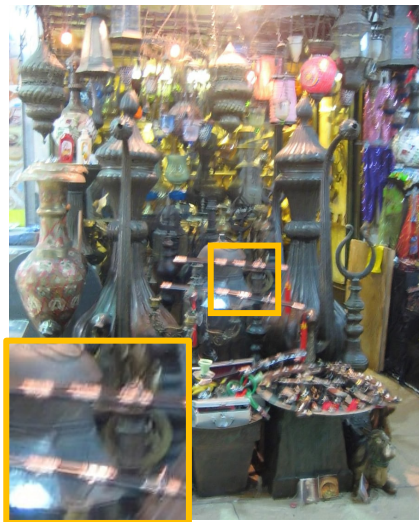

(b) Nah et al. [4]

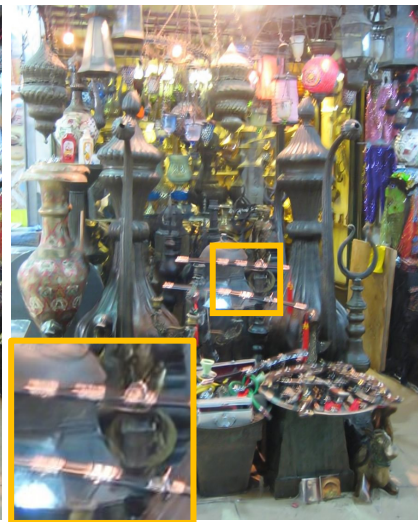

(c) Zhang et al. [5]

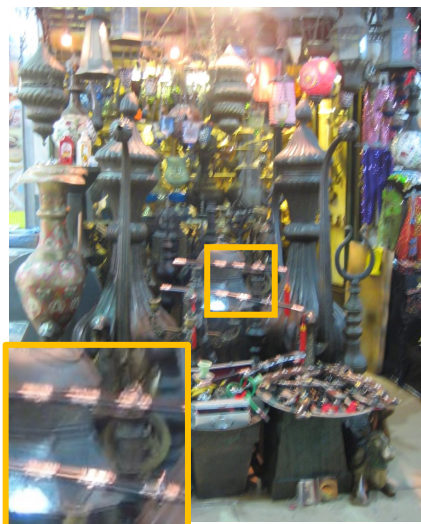

(d) Zhang et al. [6]

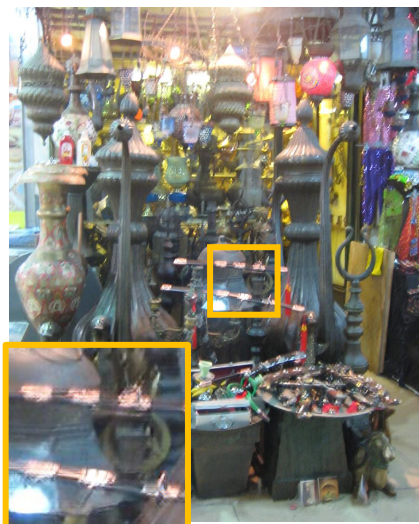

(e) DeblurGAN [7]

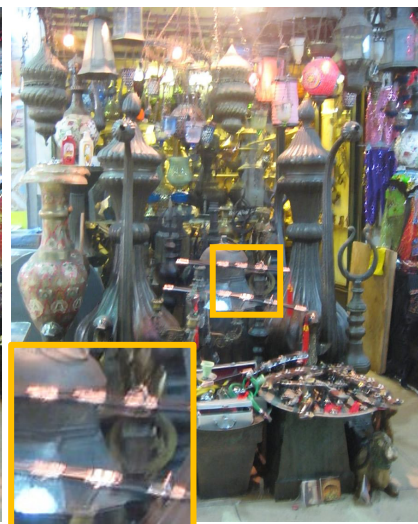

(f) DeblurGAN-v2 [8]

# Real-world blurred image dataset of Lai et al. [10] (5)

Black: deep learning-based methods. Blue\*: deep learning-based methods trained with our dataset.

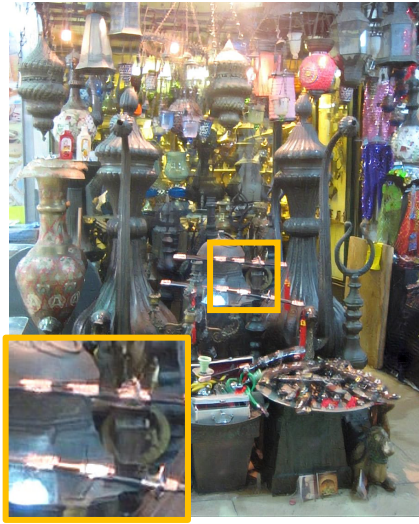

(g) DeblurGAN-v2\* [8]

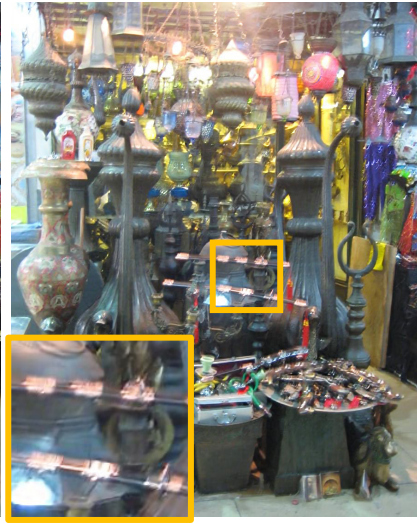

(h) SRN-DeblurNet [9]

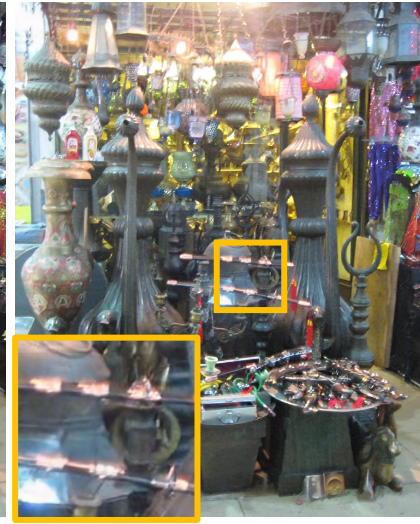

(i) SRN-DeblurNet\* [9]

# Additional examples of Galaxy S10 images (1)

Black: deep learning-based methods. Blue\*: deep learning-based methods trained with our dataset.

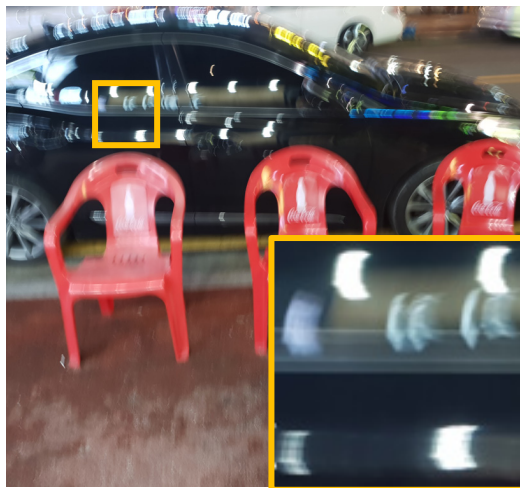

(a) Blurred image

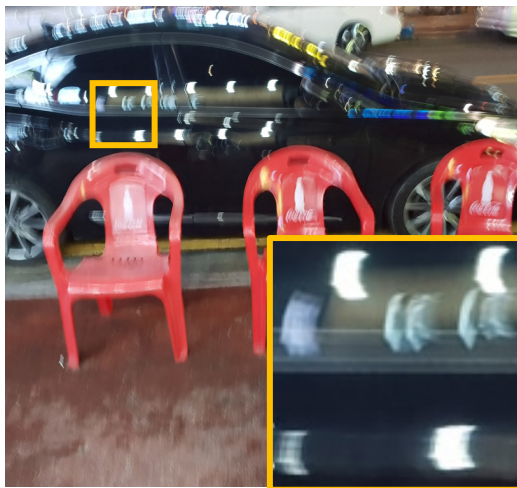

(b) Nah et al. [4]

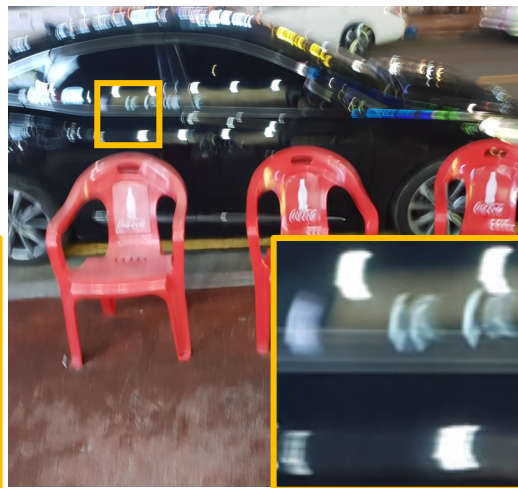

(c) Zhang et al. [5]

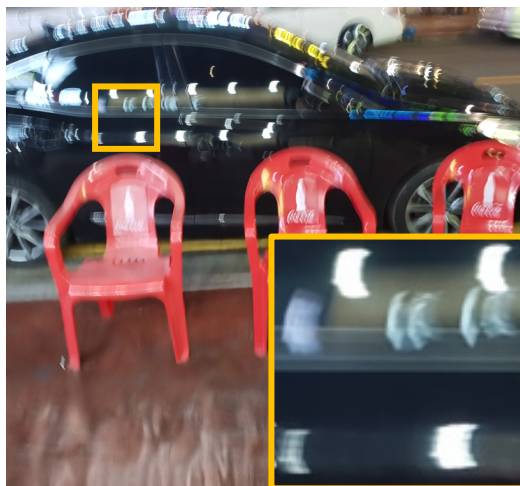

(d) Zhang et al. [6]

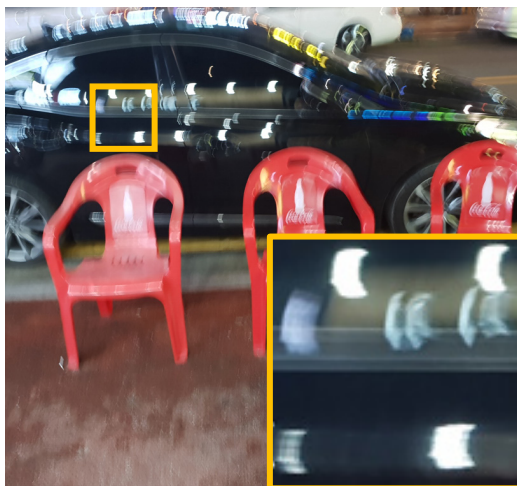

(e) DeblurGAN [7]

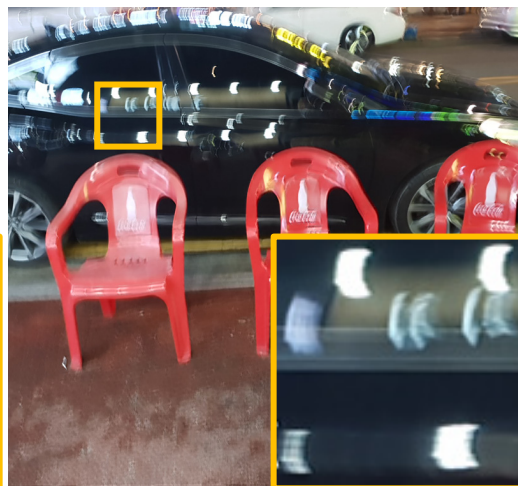

(f) DeblurGAN-v2 [8]

# Additional examples of Galaxy S10 images (1)

Black: deep learning-based methods. Blue\*: deep learning-based methods trained with our dataset.

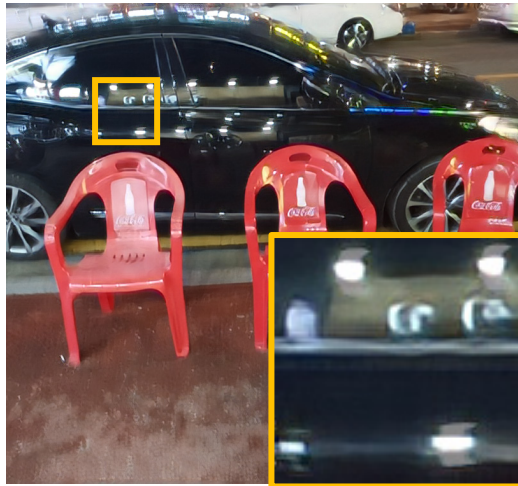

(g) DeblurGAN-v2\* [8]

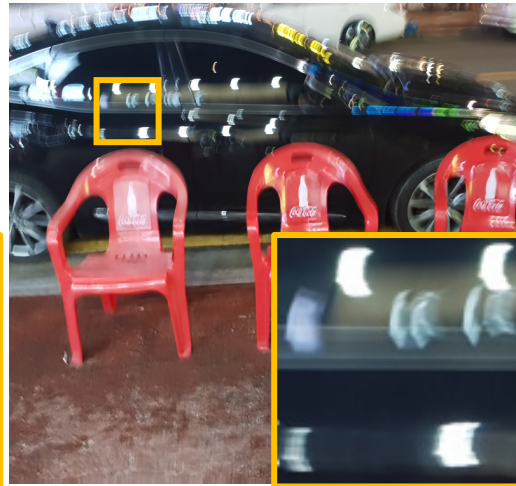

(h) SRN-DeblurNet [9]

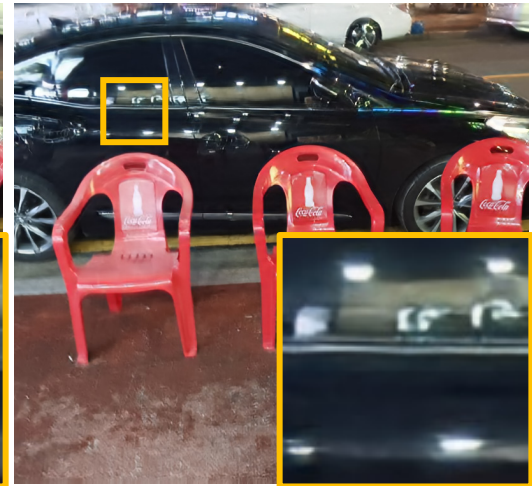

(i) SRN-DeblurNet\* [9]

# Additional examples of Galaxy S10 images (2)

Black: deep learning-based methods. Blue\*: deep learning-based methods trained with our dataset.

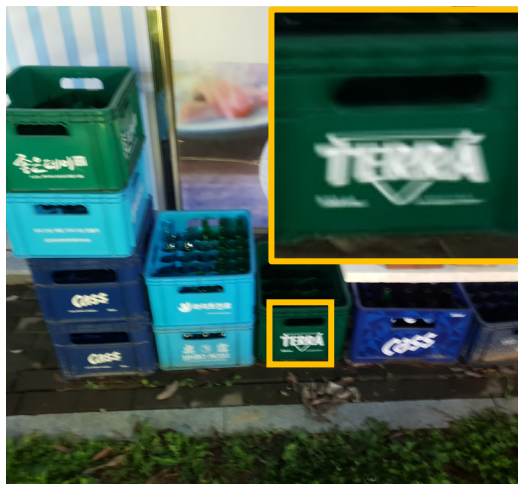

(a) Blurred image

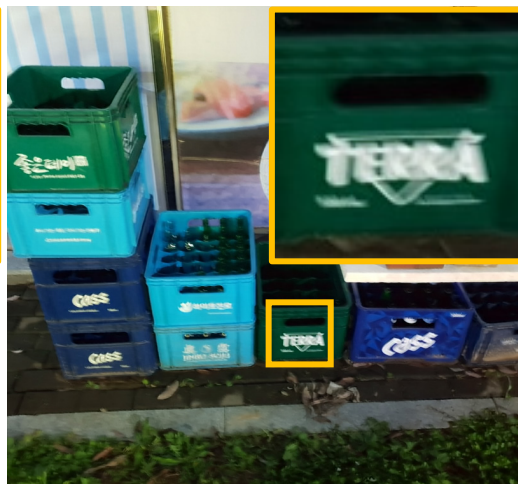

(b) Nah et al. [4]

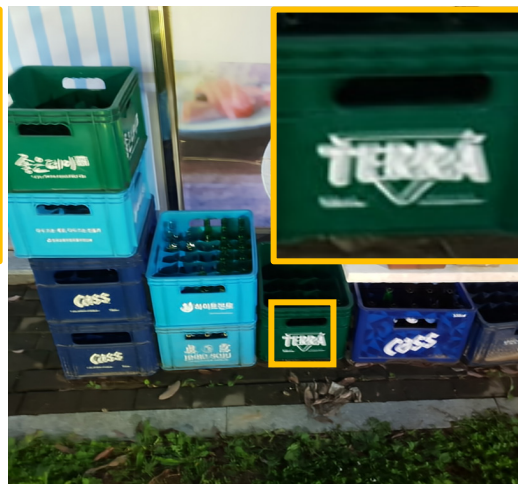

(c) Zhang et al. [5]

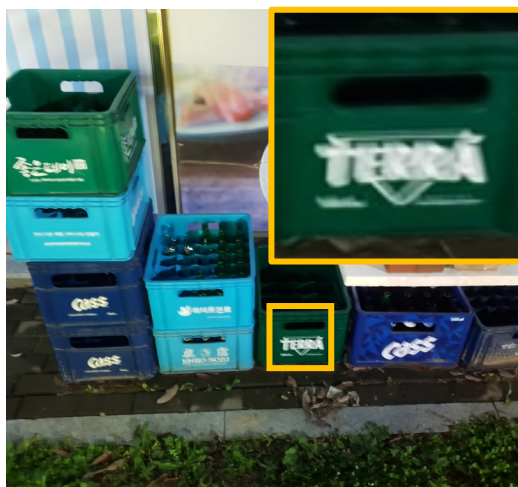

(d) Zhang et al. [6]

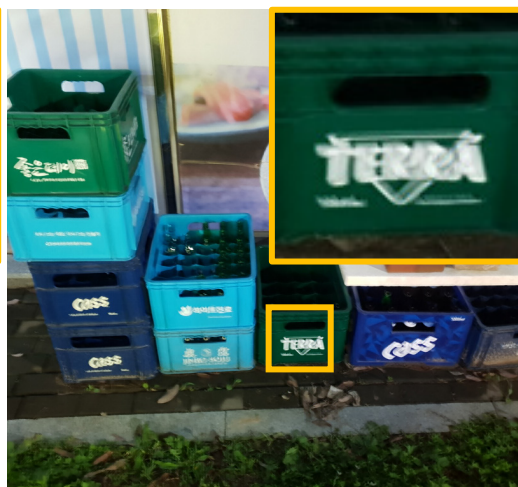

(e) DeblurGAN [7]

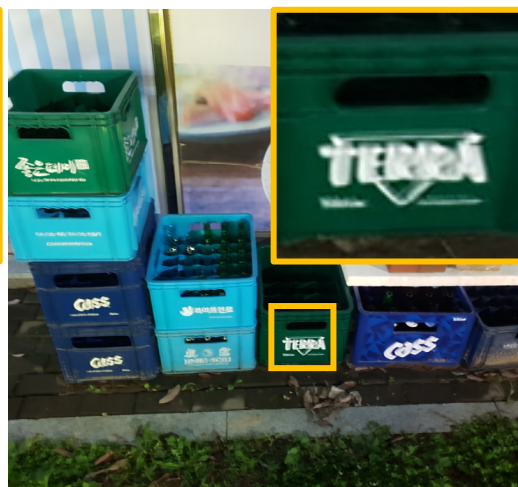

(f) DeblurGAN-v2 [8]

# Additional examples of Galaxy S10 images (2)

Black: deep learning-based methods. Blue\*: deep learning-based methods trained with our dataset.

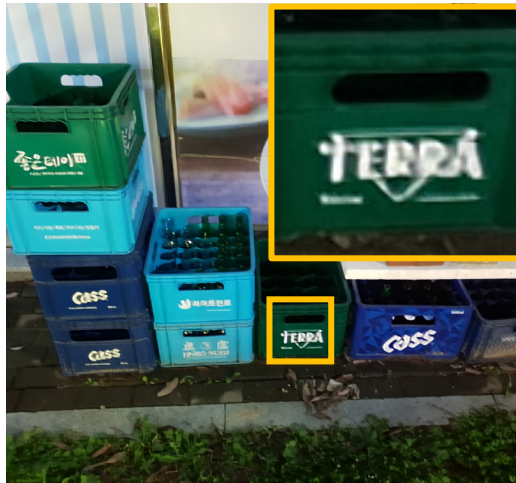

(g) DeblurGAN-v2\* [8]

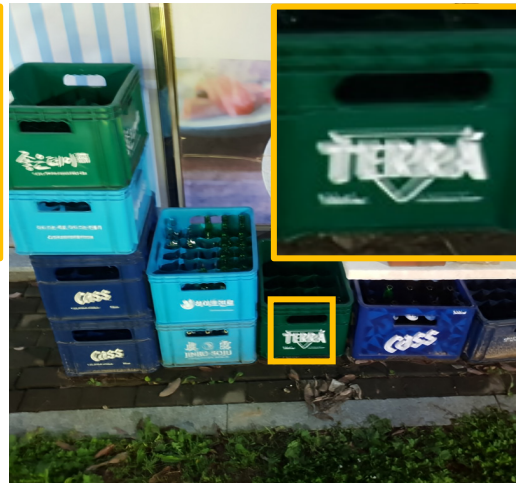

(h) SRN-DeblurNet [9]

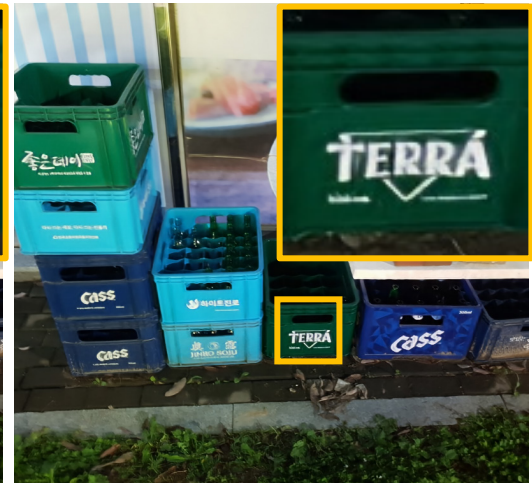

(i) SRN-DeblurNet\* [9]

# Additional examples of Galaxy S10 images (3)

Black: deep learning-based methods. Blue\*: deep learning-based methods trained with our dataset.

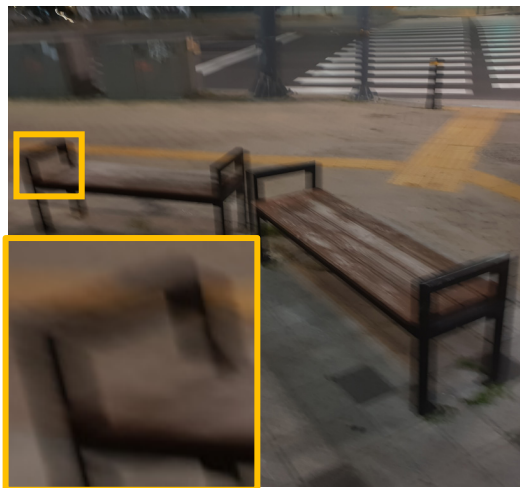

(a) Blurred image

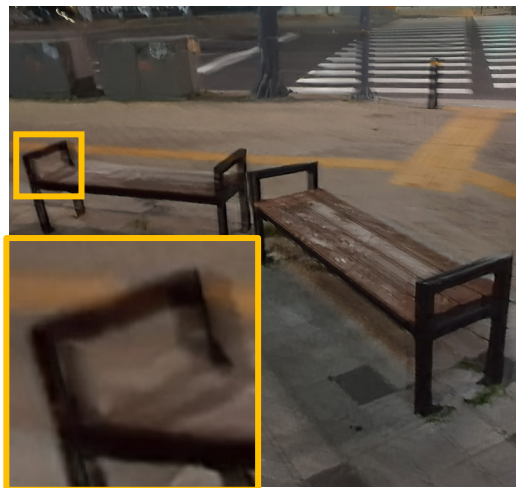

(b) Nah et al. [4]

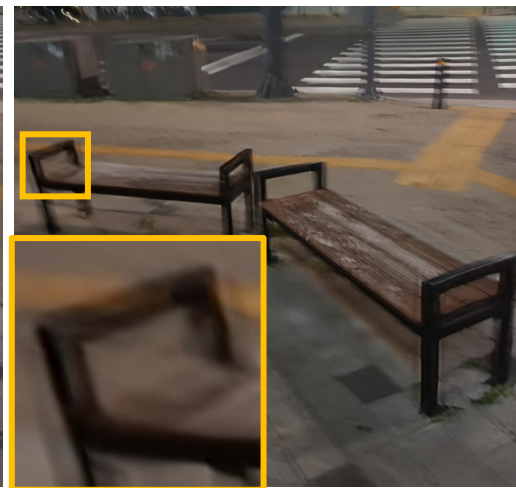

(c) Zhang et al. [5]

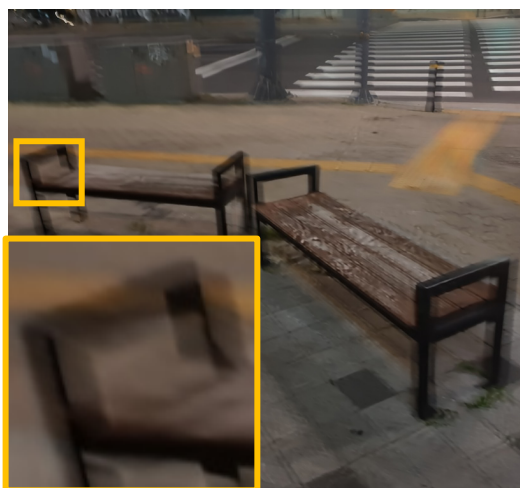

(d) Zhang et al. [6]

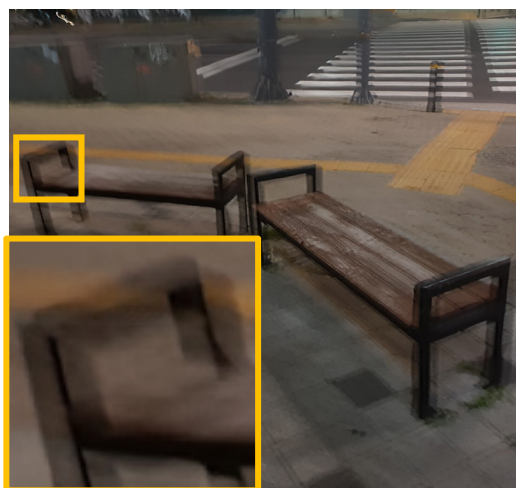

(e) DeblurGAN [7]

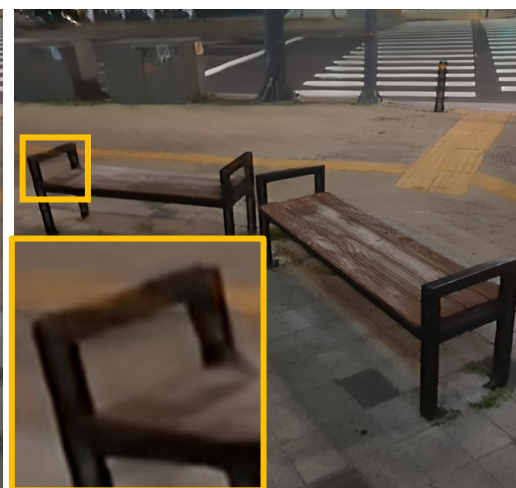

(f) DeblurGAN-v2 [8]

# Additional examples of Galaxy S10 images (3)

Black: deep learning-based methods. Blue\*: deep learning-based methods trained with our dataset.

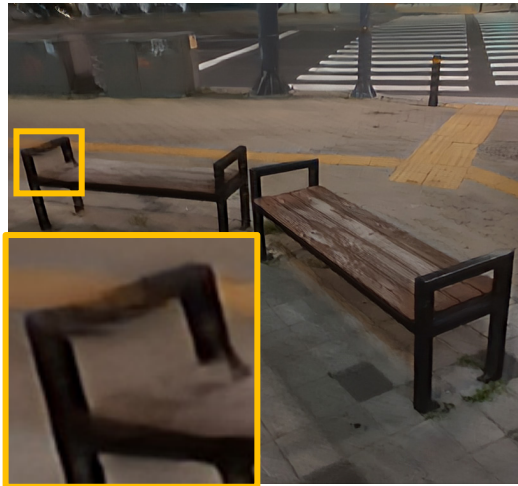

(g) DeblurGAN-v2\* [8]

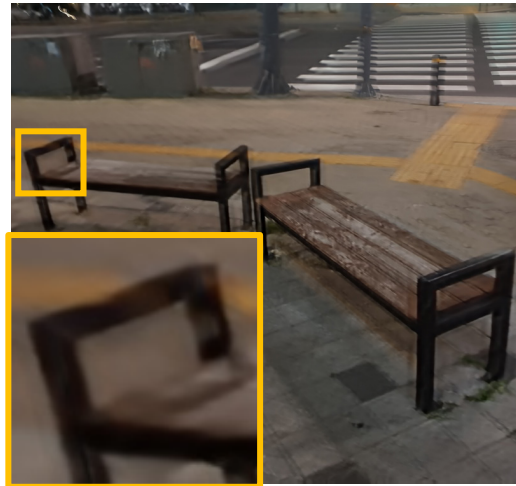

(h) SRN-DeblurNet [9]

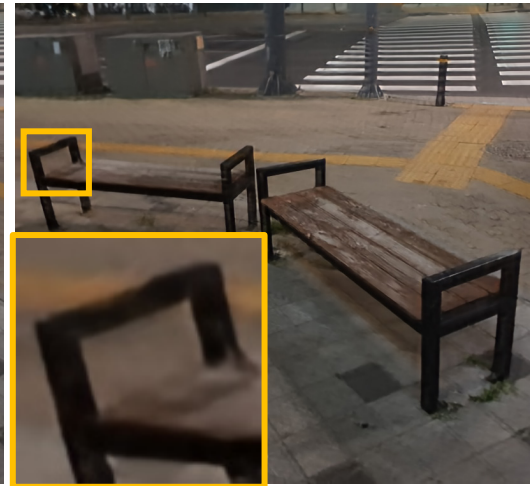

(i) SRN-DeblurNet\* [9]

# Additional examples of Galaxy S10 images (4)

Black: deep learning-based methods. Blue\*: deep learning-based methods trained with our dataset.

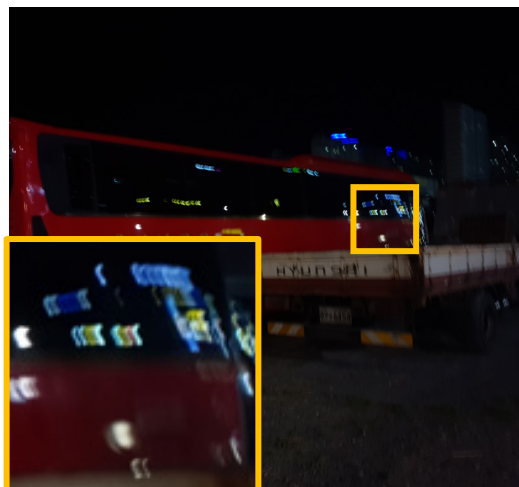

(a) Blurred image

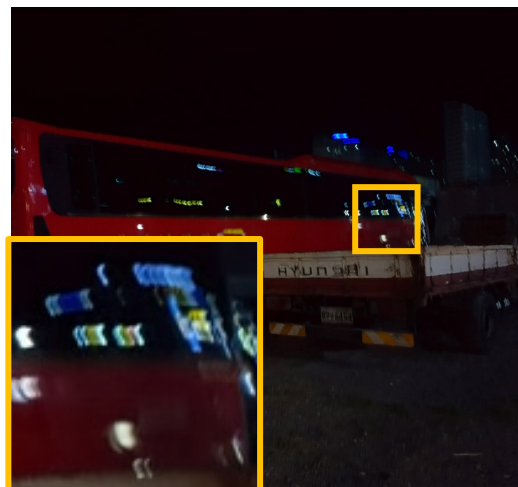

(b) Nah et al. [4]

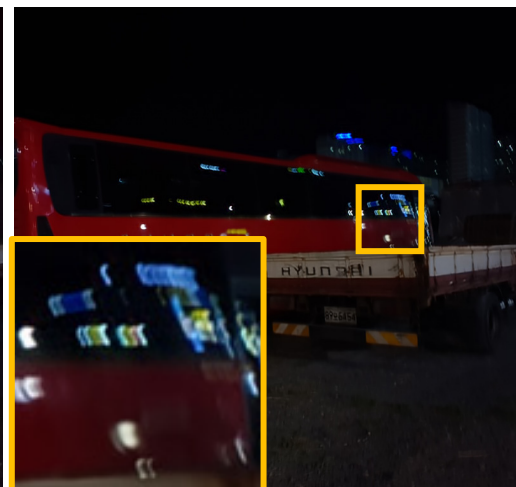

(c) Zhang et al. [5]

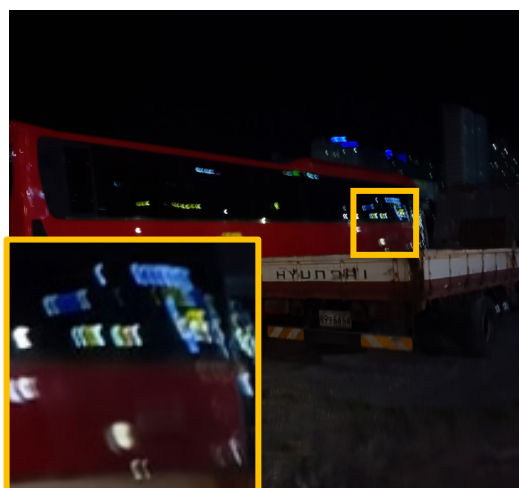

(d) Zhang et al. [6]

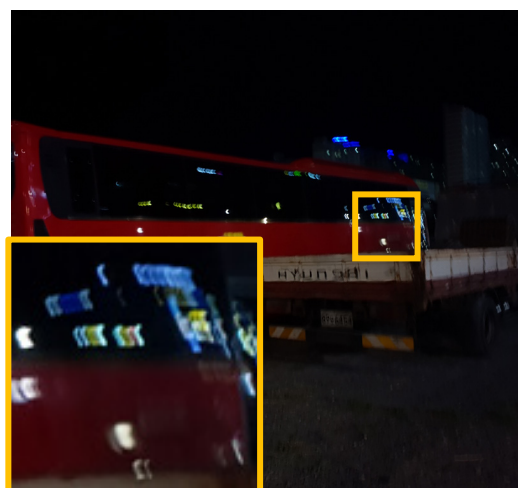

(e) DeblurGAN [7]

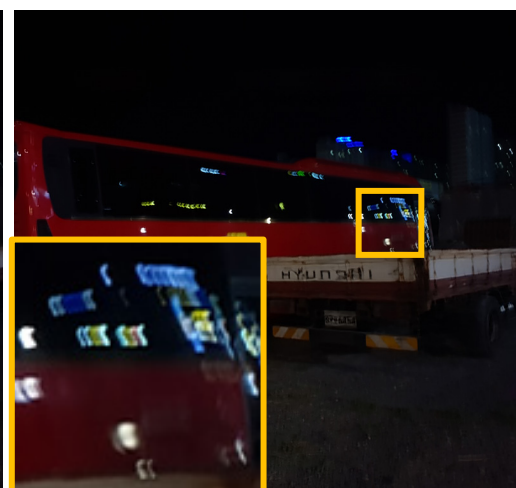

(f) DeblurGAN-v2 [8]

# Additional examples of Galaxy S10 images (4)

Black: deep learning-based methods.    Blue\*: deep learning-based methods trained with our dataset.

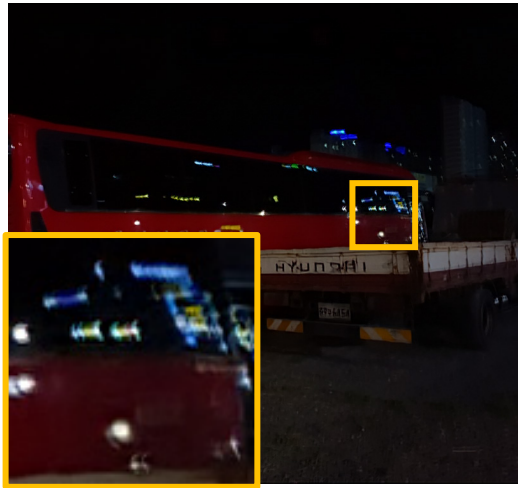

(g) DeblurGAN-v2\* [8]

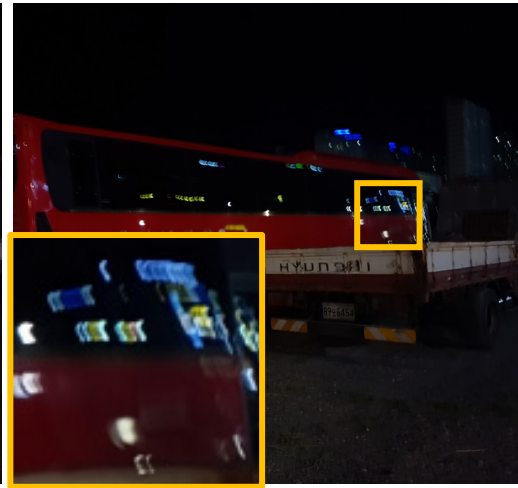

(h) SRN-DeblurNet [9]

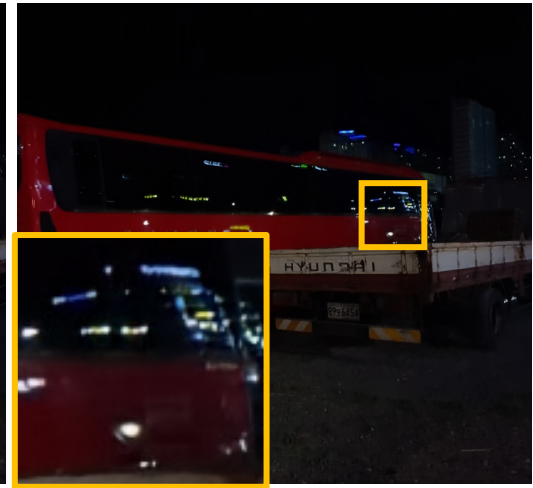

(i) SRN-DeblurNet\* [9]

# Additional examples of Galaxy S10 images (5)

Black: deep learning-based methods. Blue\*: deep learning-based methods trained with our dataset.

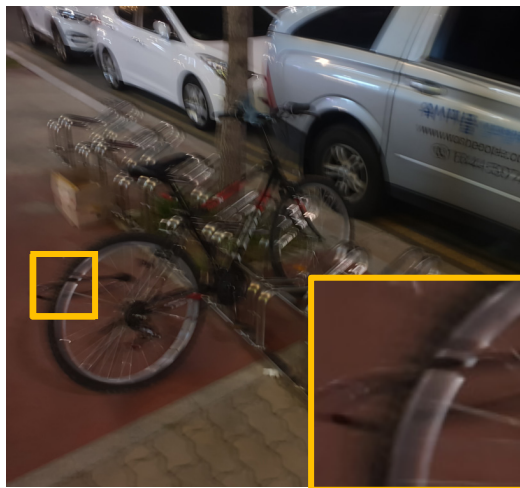

(a) Blurred image

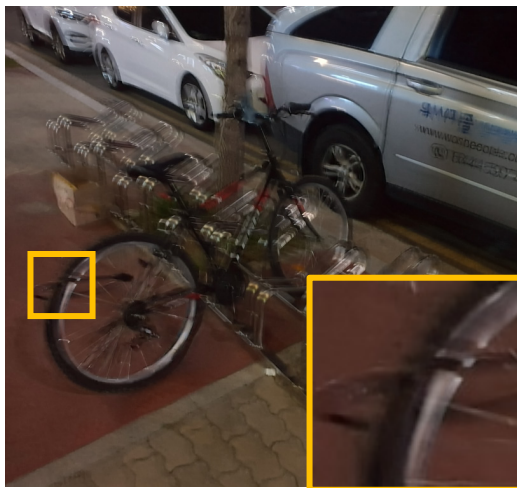

(b) Nah et al. [4]

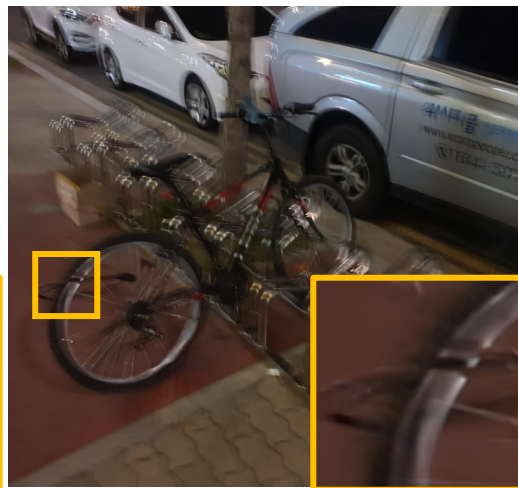

(c) Zhang et al. [5]

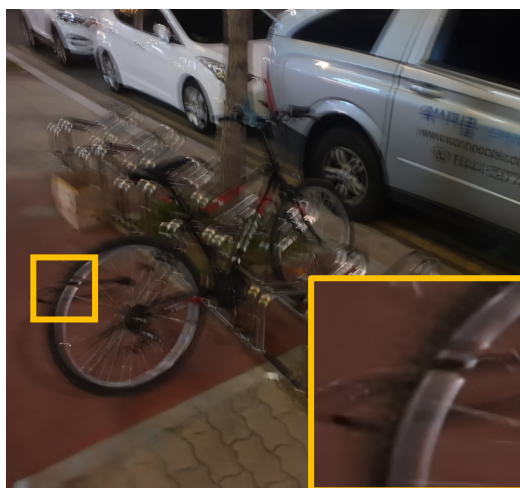

(d) Zhang et al. [6]

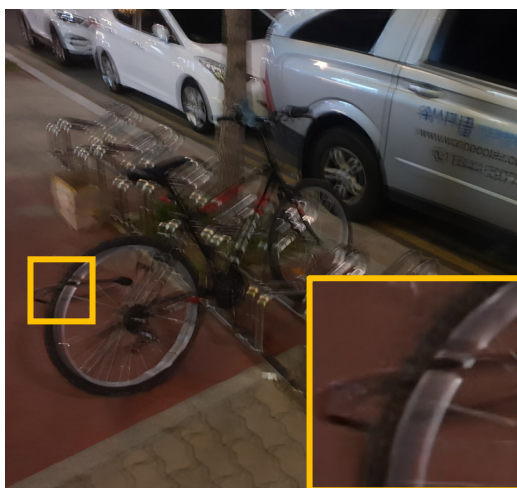

(e) DeblurGAN [7]

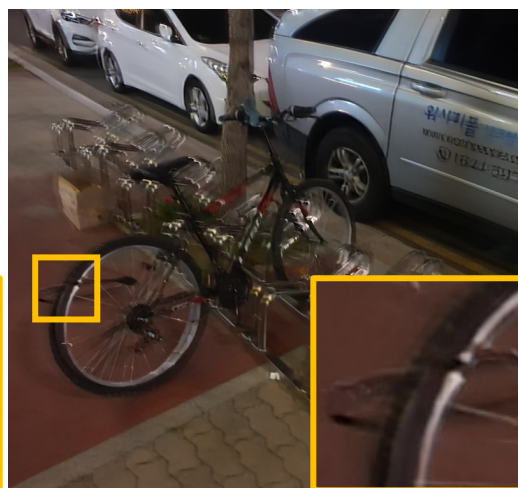

(f) DeblurGAN-v2 [8]

# Additional examples of Galaxy S10 images (5)

Black: deep learning-based methods. Blue\*: deep learning-based methods trained with our dataset.

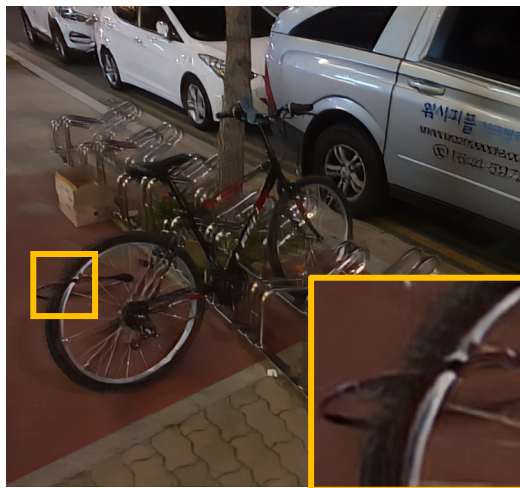

(g) DeblurGAN-v2\* [8]

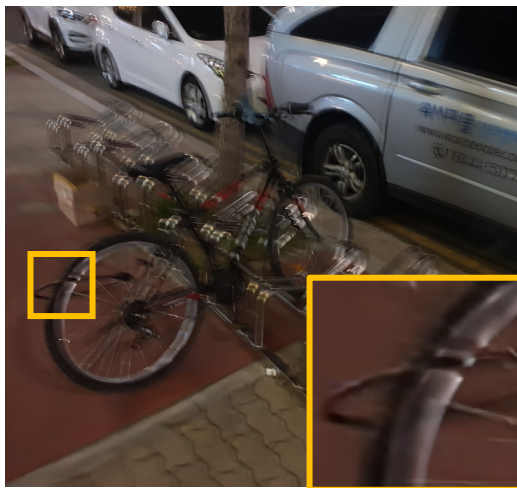

(h) SRN-DeblurNet [9]

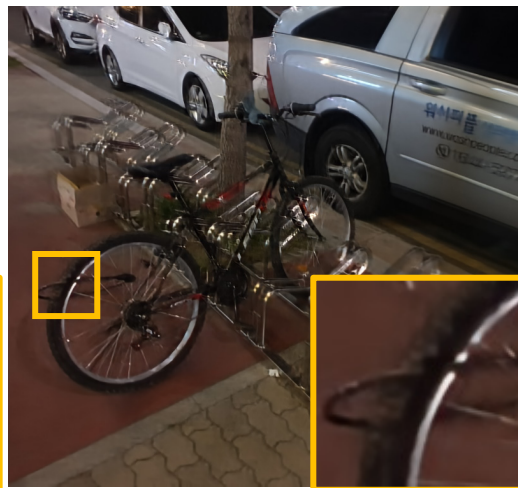

(i) SRN-DeblurNet\* [9]

# References

- [1] Xu, L., Zheng, S., Jia, J.: Unnatural L0 sparse representation for natural image deblurring. In: CVPR (2013)
- [2] Pan, J., Sun, D., Pfister, H., Yang, M.H.: Blind image deblurring using dark channel prior. In: CVPR. pp. 1628–1636 (2016)
- [3] Hu, Z., Cho, S., Wang, J., Yang, M.: Deblurring low-light images with light streaks. *IEEE Transactions on Pattern Analysis and Machine Intelligence*40(10), 2329–2341 (2018)
- [4] Nah, S., Hyun Kim, T., Mu Lee, K.: Deep multi-scale convolutional neural network for dynamic scene deblurring. In: CVPR (July 2017)
- [5] Zhang, J., Pan, J., Ren, J., Song, Y., Bao, L., Lau, R.W., Yang, M.H.: Dynamic scene deblurring using spatially variant recurrent neural networks. In: CVPR (June 2018)
- [6] Zhang, H., Dai, Y., Li, H., Koniusz, P.: Deep stacked hierarchical multi-patch network for image deblurring. In: CVPR (June 2019)
- [7] Kupyn, O., Budzan, V., Mykhailych, M., Mishkin, D., Matas, J.: DeblurGAN:Blind motion deblurring using conditional adversarial networks. In: CVPR (June 2018)
- [8] Kupyn, O., Martyniuk, T., Wu, J., Wang, Z.: DeblurGAN-v2: Deblurring (orders-of-magnitude) faster and better. In: ICCV (October 2019)
- [9] Tao, X., Gao, H., Shen, X., Wang, J., Jia, J.: Scale-recurrent network for deep image deblurring. In: CVPR (June 2018)
- [10] Lai, W.S., Huang, J.B., Hu, Z., Ahuja, N., Yang, M.H.: A comparative study for single image blind deblurring. In: CVPR (June 2016)
